# Supplementary material for: Genome-wide patterns of selection–drift variation strongly associate with organismal traits across the green plant lineage
Source: Genome Res. 2024 Aug;34(8):1130–9. doi: 10.1101/gr.279002.124 (PMC11444171; doi:10.1101/gr.279002.124)
Supplement: Supplement 13 [file Supplemental_Table_S1.xlsx]

## Sheet: Green_algae_traits_ODC
Supplemental Table S1: Table of green algae life cycles for conservative and liberal dataset with their references.
abbr	species	type of data	Body_Architecture [Model 1]	Conservative life cycle	Liberal life cycle	references/comments
ChlBryoCatax	Caulerpa taxifolia	Transcriptome	siphonous	N	diploid	The life cycle of siphonous Bryopsidales (e.g. Caulerpa, Halimeda and Codium) is not fully understood at present and may exhibit variation among species and genera. Uncertainty exists regarding the meiotic division which is might occur in the zygote stage or during gamete formation. The life cycle is interpreted, however, as functionally diplontic because even if meiosis occurs in the zygote stag…
ChlBryoCofra	Codium fragile	Transcriptome	siphonous	N	diploid	see Caulerpa
ChlBryoHadis	Halimeda discoidea	Transcriptome	siphonous	N	diploid	see Caulerpa
ChlBryoOsque	Ostreobium quekettii	Transcriptome	siphonous	N	N
ChlChaeBlriz	Blastophysa rhizopus	Transcriptome	siphonocladous	N	N	Uncertain or haplo-diplontic. See Brodie et al. 2007
ChlChldTeast	Tetraselmis astigmatica	Transcriptome	unicellular	N	N	Difficult. Possiby diplontic or haplo-diplontic. Huber, M. E. & Lewin, R. A. 1986. An electrophoretic survey of the genus Tetraselmis (Chlorophyta, Prasinophyceae). Phycologia 25:205-09.
ChlChldTestr	Tetraselmis striata	Transcriptome	unicellular	N	N	Difficult. Possiby diplontic or haplo-diplontic. Huber, M. E. & Lewin, R. A. 1986. An electrophoretic survey of the genus Tetraselmis (Chlorophyta, Prasinophyceae). Phycologia 25:205-09.
ChlChloAcacu	Acutodesmus acuminatus	Transcriptome	multicellular	N	haploid	haplontic by extrapollation
ChlChloChrei	Chlamydomonas reinhardtii	Genome	unicellular	haploid	haploid	Van den Hoek et al. (1995)
ChlChloDuter	Dunaliella tertiolecta	Transcriptome	unicellular	N	haploid	https://microbewiki.kenyon.edu/index.php/Dunaliella_salina
ChlChloGopec	Gonium pectorale	Genome	multicellular	haploid	haploid	Van den Hoek et al. (1995)
ChlChloHaplu	Haematococcus pluvialis	Transcriptome	unicellular	N	haploid	presumed haploid
ChlChloVocar	Volvox carteri	Genome	multicellular	haploid	haploid	Van den Hoek et al. (1995)
ChlChlrAupro	Auxenochlorella protothecoides	Genome	unicellular	N	haploid	presumed haploid
ChlChlrChlor	Chlorella sp NC64A	Genome	unicellular	N	haploid	presumed haploid and sexual (see Blanc, G., Duncan, G., Agarkova, I., Borodovsky, M., Gurnon, J., Kuo, A., Lindquist, E., Lucas, S., Pangilinan, J., Polle, J., Salamov, A., Terry, A., Yamada, T., Dunigan, D. D., Grigoriev, I. V., Claverie, J.-M. & Van Etten, J. L. 2010. The Chlorella variabilis NC64A genome reveals adaptation to photosymbiosis, coevolution with viruses, and cryptic Sex. Plant Cel…
ChlChlrPiokl	Picochlorum oklahomensis	Transcriptome	unicellular	N	haploid	presumed haploid
ChlCladBocom	Boodlea composita	Transcriptome	siphonocladous	N	haploid-diploid	see Van de Hoek et al. (1995) and Skaloud et al. (2018)
ChlCladClglo	Cladophora glomerata	Transcriptome	siphonocladous	N	haploid-diploid	see Van de Hoek et al. (1995) and Skaloud et al. (2018)
ChlDasyAcace	Acetabularia acetabulum	Transcriptome	siphonous	N	diploid	I used the same reasoning here as for Caulerpa, which is not in agreement with Van den Hoek et al. (1995: 492-493)
ChlIgnaIgtet	Ignatius tetrasporus	Transcriptome	unicellular	N	N
ChlOltmOluni	Oltmannsiellopsis unicellularis	Transcriptome	unicellular	N	N
ChlOltmOlvir	Oltmannsiellopsis viridis	Transcriptome	unicellular	N	N
ChlPediMarsu	Marsupiomonas sp.	Transcriptome	unicellular	N	N
ChlPediPemin	Pedinomonas minor	Transcriptome	unicellular	N	N
ChlPediYPF70	Pedinophyte YPF701	Transcriptome	unicellular	N	N
ChlPrasBapra	Bathycoccus prasinos	Genome	unicellular	N	haploid	not known, but you could extrapollate to haplontic
ChlPrasMipus	Micromonas pusilla	Genome	unicellular	N	haploid	not known, but you could extrapollate to haplontic
ChlPrasNepyr	Nephroselmis pyriformis	Transcriptome	unicellular	N	haploid	Suda, S., Watanabe, M. M. & Inouye, I. 1989. Evidence for sexual reproduction in the primitive green alga Nephroselmis olivacea (Prasinophyceae). J. Phycol. 25:596-600.
ChlPrasOstau	Ostreococcus tauri	Genome	unicellular	N	haploid	haplontic (see Grimsley, N., Pequin, B., Bachy, C., Moreau, H. & Piganeau, G. Cryptic Sex in the Smallest Eukaryotic Marine Green Alga. Mol. Biol. Evol. 27:47-54.)
ChlPrasPisal	Picocystis salinarum	Transcriptome	unicellular	N	N
ChlScotSclem	Scotinosphaera lemnae	Transcriptome	unicellular	N	N
ChlTrebAster	Asterochloris sp. Cgr/DA1pho	Genome	unicellular	haploid	haploid	Frederik Leliaert, in Encyclopedia of Microbiology (Fourth Edition), 2019 (he says that this group usually have haploid life cycles)
ChlTrebBobra	Botrycoccus braunii	Transcriptome	multicellular	haploid	haploid
ChlTrebCosub	Coccomyxa subellipsoidea	Genome	unicellular	haploid	haploid
ChlTrebPspri	Pseudochlorella pringsheimii	Transcriptome	unicellular	haploid	haploid
ChlTrebTrgel	Trebouxia gelatinosa	Transcriptome	unicellular	haploid	haploid
ChlTrenCepar	Cephaleuros parasiticus	Transcriptome	multicellular	N	haploid-diploid	extrapolated to haplodiplontic
ChlTrenTrann	Trentepohlia annulata	Transcriptome	multicellular	haploid-diploid	haploid-diploid	The most widespread hypothesis is that the life history probably consists ofan isomorphic alternance of diploid sporophytes producing quadriflagellate meiospores and haploid gametophytes producing biflagellate gametes, which fuse isogamously (Wille 1878, Oltmanns 1922, Printz 1964,Thompson and Wujek 1997). However, Rindi and Guiry (2002) could not reproduce this (life cycle only asexual in their …
ChlTrenTrjol	Trentepohlia jolithus	Transcriptome	multicellular	haploid-diploid	haploid-diploid
ChlUlotAcros	Acrosiphonia sp.	Transcriptome	multicellular	haploid	haploid	Van den Hoek et al. (1995)
ChlUlvaPhden	Phaeophila dendroides	Transcriptome	multicellular	haploid-diploid	haploid-diploid	Van den Hoek et al. (1995)
ChlUlvaUllin	Ulva linza	Transcriptome	multicellular	haploid-diploid	haploid-diploid	Van den Hoek et al. (1995)
ChlUlvoUlmut	Ulva mutabilis	Genome	multicellular	haploid-diploid	haploid-diploid	Van den Hoek et al. (1995)
StrCharChvul	Chara vulgaris	Transcriptome	multicellular	haploid	haploid	Van den Hoek et al. (1995)
StrChloChatm	Chlorokybus atmophyticus	Transcriptome	multicellular	haploid	haploid	Irisarri et al.(2021) and Rieth A(1972)
StrColeChglo	Chaetosphaeridium globosum	Transcriptome	multicellular	haploid	haploid	Van den Hoek et al. (1995)
StrColeCoorb	Coleochaete orbicularis	Transcriptome	multicellular	haploid	haploid	Van den Hoek et al. (1995)
StrEmbrArtha	Arabidopsis thaliana	Genome	multicellular	haploid-diploid	haploid-diploid	Niklas.K. J and Kutschera.U (2010)
StrEmbrOrsat	Oryza sativa	Genome	multicellular	haploid-diploid	haploid-diploid
StrEmbrPhpat	Physcomitrella patens	Genome	multicellular	haploid-diploid	haploid-diploid
StrEmbrSemoe	Selaginella moellendorfii	Genome	multicellular	haploid-diploid	haploid-diploid
StrKlebKlfla	Klebsormidium flaccidum	Transcriptome	multicellular	N	N
StrMesoMevir	Mesostigma viride	Transcriptome	unicellular	N	N
StrZygnMeend	Mesotaenium endlicherianum	Transcriptome	unicellular	haploid	haploid	Sexual cycles of the conjugating algae are haplobiontic. They display zygotic meiosis; growing cells are haploid; and meiosis occurs in the zygote, the only diploid cell in the sexual cycle. (J.D. Hall and R.M. McCourt), 2017)
StrZygnRoobt	Roya obtusa	Transcriptome	unicellular	haploid	haploid
N-no information
UH - Unicellular haplontic
MH - Multicellular haplontic
MHD - Multicellular haplo-diplontic
