# Supplementary material for: Genome-wide patterns of selection–drift variation strongly associate with organismal traits across the green plant lineage
Source: Genome Res. 2024 Aug;34(8):1130–9. doi: 10.1101/gr.279002.124 (PMC11444171; doi:10.1101/gr.279002.124)
Supplement: Supplement 14 [file Supplemental_Table_S2.xlsx]

## Sheet: temp_07_31
Supplemental Table S2: PAML outputs for body architecture based models[M1]. Lists the dN, dS and dN/dS values of low copy genes of unicellular, multicellular, siphonus and siphonocladous algae.
	Unicellular algae			Multicellular alage			Siphonous algae			Siphonocladous algae
Gene	dN/dS	dN	dS	dN/dS	dN	dS	dN/dS	dN	dS	dN/dS	dN	dS
R_HOMCHL000439	0.10291	0.05	0.4863	0.04036	0.0933	2.3111	0.02155	0.2868	13.3081	0.02548	0.0625	2.4513
R_HOMCHL000496	0.1241	0.0884	0.712	0.0645	0.0761	1.1801	0.00402	0.0924	23.0034	0.00434	0.0985	22.7073
R_HOMCHL000664	0.1392	0.0707	0.5076	0.07459	0.0752	1.0084	0.00371	0.1208	32.5288	0.00316	0.1032	32.687
R_HOMCHL000732	0.00782	0.0767	9.8058	0.00724	0.0858	11.8571	0.02958	0.0948	3.2044	0.00234	0.1181	50.4806
R_HOMCHL000737	0.06345	0.0641	1.0109	0.06112	0.071	1.1624	0.00218	0.1101	50.5794	0.01302	0.0858	6.5901
R_HOMCHL000773	0.10421	0.0807	0.7742	0.04617	0.1171	2.5363	0.00647	0.2104	32.4924	0.00432	0.2976	68.939
R_HOMCHL000781	0.07057	0.0435	0.616	0.039	0.0366	0.9391	0.03762	0.0507	1.3472	0.00154	0.0277	18.0861
R_HOMCHL000789	0.08783	0.1268	1.4441	0.0707	0.154	2.1774	0.00685	0.2165	31.6318	0.00573	0.3823	66.7339
R_HOMCHL000807	0.08773	0.0795	0.9063	0.04971	0.1479	2.9749	0.00481	0.0971	20.1848	0.03656	0.2561	7.0037
R_HOMCHL000826	0.11803	0.1237	1.0481	0.08857	0.1463	1.6524	0.02243	0.3794	16.9165	0.00639	0.313	49.0057
R_HOMCHL000844	0.04836	0.0423	0.8744	0.0338	0.038	1.1246	0.00864	0.0374	4.3347	0.00752	0.063	8.3728
R_HOMCHL000878	0.00596	0.1265	21.2238	0.00945	0.1244	13.1617	0.04983	0.1261	2.5302	0.0048	0.1241	25.8399
R_HOMCHL000897	0.02523	0.12	4.7586	0.06546	0.1939	2.9621	0.00521	0.257	49.3126	0.1066	0.289	2.7108
R_HOMCHL000921	0.09069	0.0542	0.5981	0.01388	0.0546	3.9318	0.00595	0.0803	13.4968	0.00355	0.1096	30.8705
R_HOMCHL000939	0.00673	0.123	18.2875	0.03243	0.1633	5.0349	0.00391	0.3091	79.1575	0.00335	0.1334	39.8104
R_HOMCHL000944	0.11534	0.0562	0.4872	0.04574	0.0693	1.5154	0.02454	0.0801	3.2619	0.0021	0.0692	32.9738
R_HOMCHL000952	0.03427	0.0756	2.2057	0.02836	0.1376	4.852	0.00475	0.0876	18.4448	0.00525	0.0844	16.0778
R_HOMCHL000959	0.05657	0.0877	1.5496	0.03695	0.0992	2.6851	0.02018	0.1247	6.1802	0.00459	0.1251	27.271
R_HOMCHL000962	0.06477	0.05	0.7716	0.02653	0.041	1.5452	0.00659	0.0834	12.6601	0.01413	0.0671	4.7523
R_HOMCHL000964	0.05366	0.0751	1.3996	0.03523	0.0655	1.8581	0.02127	0.191	8.9803	0.03378	0.1939	5.7393
R_HOMCHL000975	0.1521	0.1201	0.7897	0.10045	0.1247	1.2418	0.02734	0.1401	5.1253	0.08979	0.2429	2.7051
R_HOMCHL000977	0.04481	0.0469	1.0463	0.03346	0.0433	1.2934	0.00331	0.0478	14.4296	0.00135	0.0541	40.0632
R_HOMCHL000979	0.09266	0.0759	0.8196	0.0494	0.073	1.4772	0.00187	0.1342	71.5929	0.00156	0.1071	68.8619
R_HOMCHL000982	0.05938	0.0878	1.4793	0.03468	0.1011	2.915	0.00468	0.0788	16.8521	0.0139	0.17	12.2299
R_HOMCHL000998	0.06616	0.0579	0.8749	0.03347	0.0437	1.3055	0.02553	0.0539	2.1113	0.00549	0.0662	12.0717
R_HOMCHL001007	0.05712	0.088	1.5407	0.04101	0.0642	1.5652	0.05356	0.1002	1.8699	0.01436	0.0673	4.6841
R_HOMCHL001026	0.06843	0.0747	1.092	0.08111	0.0889	1.0957	0.00452	0.1028	22.7687	0.02297	0.0825	3.5929
R_HOMCHL001040	0.07526	0.1139	1.513	0.06818	0.1295	1.899	0.00914	0.1909	20.8896	0.0244	0.5169	21.1877
R_HOMCHL001069	0.04811	0.0777	1.6158	0.06079	0.086	1.4146	0.00555	0.1044	18.8243	0.0041	0.1003	24.4403
R_HOMCHL001123	0.06081	0.0472	0.7767	0.02359	0.0487	2.065	0.00116	0.0683	58.7068	0.00102	0.0465	45.4654
R_HOMCHL001141	0.06818	0.0977	1.4333	0.03751	0.1028	2.7395	0.0219	0.1543	7.0452	0.01356	0.134	9.8868
R_HOMCHL001147	0.0833	0.0815	0.9786	0.03762	0.0767	2.0393	0.00259	0.0793	30.5712	0.00233	0.1215	52.1026
R_HOMCHL001154	0.0088	0.1352	15.3698	0.04631	0.1024	2.2122	0.01136	0.134	11.7996	0.02107	0.1437	6.8228
R_HOMCHL001160	0.09137	0.0558	0.611	0.0431	0.0865	2.0072	0.0034	0.0798	23.4494	0.00144	0.0844	58.7877
R_HOMCHL001161	0.0132	0.1123	8.5087	0.00503	0.1152	22.9156	0.004	0.1643	41.0393	0.00236	0.1626	68.9251
R_HOMCHL001169	0.00629	0.1351	21.4717	0.02952	0.1667	5.6461	0.00524	0.2078	39.6514	0.00662	0.4671	70.5672
R_HOMCHL001170	0.13556	0.0939	0.6931	0.07897	0.1023	1.295	0.07156	0.1363	1.9046	0.00745	0.2116	28.3966
R_HOMCHL001173	0.02208	0.1204	5.4523	0.06945	0.1186	1.7077	0.00527	0.1704	32.3253	0.00454	0.1696	37.3292
R_HOMCHL001175	0.03321	0.1984	5.9746	0.03202	0.1118	3.4907	0.06114	0.1816	2.9701	0.05223	0.3238	6.2006
R_HOMCHL001182	0.09399	0.1133	1.2056	0.04431	0.1051	2.3719	0.00668	0.1648	24.6782	0.02734	0.2577	9.4247
R_HOMCHL001203	0.01537	0.109	7.0871	0.03621	0.144	3.976	0.00514	0.1026	19.94	0.00238	0.1076	45.1728
R_HOMCHL001205	0.05598	0.0387	0.6912	0.0246	0.0416	1.6919	0.01559	0.0764	4.9042	0.00786	0.0531	6.7535
R_HOMCHL001216	0.01959	0.0664	3.3883	0.01045	0.0715	6.8402	0.0194	0.086	4.4311	0.00235	0.1119	47.5471
R_HOMCHL001217	0.03462	0.0834	2.4087	0.03777	0.0868	2.2985	0.01886	0.2236	11.8591	0.00858	0.267	31.1395
R_HOMCHL001230	0.06076	0.108	1.7778	0.04178	0.0898	2.1502	0.00915	0.1212	13.2474	0.03115	0.1298	4.1665
R_HOMCHL001240	0.07684	0.1718	2.2359	0.05425	0.18	3.3183	0.09778	0.2999	3.0666	0.21597	0.8513	3.9418
R_HOMCHL001242	0.06091	0.0631	1.0356	0.0489	0.0604	1.2358	0.00366	0.1289	35.26	0.00256	0.1161	45.2698
R_HOMCHL001248	0.00487	0.1316	27.0068	0.07103	0.1716	2.4164	0.00514	0.1249	24.3145	0.0049	0.1316	27.0068
R_HOMCHL001253	0.0931	0.1079	1.1585	0.05347	0.1118	2.0913	0.00431	0.1479	34.3015	0.00351	0.1338	38.0736
R_HOMCHL001258	0.04935	0.1299	2.6316	0.07399	0.1516	2.0485	0.0072	0.248	34.464	0.00376	0.2118	56.3896
R_HOMCHL001261	0.07145	0.0706	0.9878	0.06509	0.1267	1.9461	0.07441	0.1055	1.418	0.00213	0.138	64.8773
R_HOMCHL001265	0.0052	0.12	23.0746	0.05255	0.1132	2.1541	0.00386	0.1125	29.1839	0.01035	0.1624	15.6899
R_HOMCHL001273	0.06276	0.0908	1.447	0.06595	0.0865	1.3117	0.04688	0.1225	2.6142	0.00333	0.0908	27.2436
R_HOMCHL001274	0.06165	0.0553	0.8964	0.05837	0.0615	1.0535	0.02577	0.0738	2.8642	0.02431	0.076	3.1272
R_HOMCHL001278	0.05389	0.0383	0.7108	0.03413	0.0421	1.2329	0.01401	0.0554	3.9552	0.0151	0.1069	7.079
R_HOMCHL001285	0.00504	0.1211	24.0166	0.06272	0.1351	2.1546	0.00511	0.1954	38.2016	0.03058	0.1844	6.0321
R_HOMCHL001287	0.02991	0.106	3.5431	0.03093	0.1186	3.8338	0.02587	0.2527	9.7671
R_HOMCHL001292	0.00357	0.0876	24.5417	0.00561	0.1104	19.67	0.00462	0.1297	28.075	0.00247	0.1362	55.1192
R_HOMCHL001293	0.00679	0.1382	20.3566	0.03555	0.1295	3.6413	0.00895	0.2053	22.9219	0.06834	0.3312	4.8468
R_HOMCHL001305	0.00547	0.1671	30.5593	0.04867	0.164	3.3703	0.00524	0.2166	41.3778	0.00492	0.2585	52.4923
R_HOMCHL001327	0.09423	0.0937	0.9945	0.08375	0.1124	1.3423	0.00309	0.1297	42.0089	0.01497	0.3325	22.2042
R_HOMCHL001339	0.00345	0.0984	28.5012	0.01406	0.134	9.5253	0.00386	0.147	38.111	0.00246	0.1127	45.7975
R_HOMCHL001344	0.06653	0.1199	1.8014	0.04577	0.1135	2.4791	0.00432	0.135	31.2616	0.02248	0.1393	6.1958
R_HOMCHL001356	0.00975	0.1348	13.8264	0.00638	0.1176	18.429	0.00539	0.1749	32.4325	0.0048	0.2379	49.5759
R_HOMCHL001359	0.01456	0.0842	5.7849	0.02962	0.0837	2.8244	0.00317	0.1032	32.5589	0.00227	0.0873	38.4022
R_HOMCHL001361	0.00881	0.1883	21.3757	0.09147	0.1625	1.7762	0.01252	0.2521	20.1377	0.00449	0.3327	74.094
R_HOMCHL001362	0.00547	0.0949	17.3664	0.06776	0.0756	1.115	0.00533	0.1148	21.5547	0.28076	0.3051	1.0868
R_HOMCHL001367	0.02579	0.0713	2.7657	0.01927	0.0956	4.9628	0.00595	0.081	13.5984	0.00229	0.1341	58.577
R_HOMCHL001369	0.0178	0.1211	6.8019	0.0208	0.0904	4.3473	0.00328	0.0993	30.2695	0.00245	0.123	50.2892
R_HOMCHL001370	0.0338	0.0946	2.7989	0.05795	0.1233	2.1285	0.02475	0.1041	4.2047	0.00214	0.1053	49.1454
R_HOMCHL001372	0.00554	0.1066	19.2542	0.00346	0.1255	36.2178	0.00479	0.1971	41.1082	0.00432	0.2645	61.2381
R_HOMCHL001374	0.10477	0.1219	1.1633	0.0624	0.1209	1.937	0.00368	0.1781	48.353	0.06263	0.1701	2.7149
R_HOMCHL001387	0.06856	0.1063	1.5501	0.05164	0.1016	1.9681	0.00456	0.1011	22.1608	0.0022	0.1277	57.9732
R_HOMCHL001395	0.11058	0.1377	1.2448	0.11595	0.1359	1.1724	0.09138	0.2219	2.4283	0.03245	0.1636	5.0427
R_HOMCHL001409	0.04741	0.0948	2	0.08908	0.0937	1.0517	0.00353	0.1675	47.4679	0.04868	0.1229	2.5254
R_HOMCHL001412	0.07342	0.1208	1.6449	0.10884	0.1435	1.3186	0.00458	0.1295	28.2622	0.04141	0.1683	4.0664
R_HOMCHL001414	0.04498	0.125	2.7784	0.03738	0.0931	2.4902	0.00462	0.1282	27.7526	0.00347	0.2128	61.3581
R_HOMCHL001415	0.04236	0.1197	2.8245	0.05297	0.1376	2.5973	0.00472	0.2021	42.8313	0.00391	0.2053	52.4508
R_HOMCHL001427	0.00474	0.1302	27.5007	0.00718	0.1585	22.0789	0.01249	0.2843	22.7544	0.00376	0.2368	62.9659
R_HOMCHL001433	0.07796	0.1544	1.9801	0.10273	0.156	1.5187	0.04228	0.1948	4.6067	0.08549	0.2712	3.1724
R_HOMCHL001434	0.03392	0.1278	3.7688	0.05366	0.159	2.9637	0.00542	0.2101	38.7447	0.00419	0.1802	43.0121
R_HOMCHL001438	0.01018	0.0862	8.4678	0.05472	0.0961	1.7563	0.00842	0.1461	17.3589	0.00311	0.1558	50.0436
R_HOMCHL001443	0.05893	0.0593	1.0062	0.04452	0.0733	1.6454	0.0277	0.0936	3.3807	0.00153	0.1023	66.7621
R_HOMCHL001445	0.07207	0.1057	1.4664	0.07833	0.1174	1.4985	0.00897	0.1648	18.3748	0.01734	0.1506	8.687
R_HOMCHL001446	0.00715	0.1539	21.5335	0.00483	0.1563	32.3982	0.00445	0.2221	49.948	0.0049	0.2758	56.2818
R_HOMCHL001451	0.06059	0.0957	1.5791	0.06122	0.0829	1.3548	0.02289	0.1436	6.2762	0.00672	0.1587	23.6273
R_HOMCHL001460	0.01511	0.1485	9.8271	0.00796	0.1266	15.9136	0.00437	0.1602	36.6497	0.03161	0.3599	11.3862
R_HOMCHL001467	0.02903	0.0877	3.0219	0.03643	0.0937	2.5711	0.02115	0.4006	18.9384	0.01682	1.2371	73.5695
R_HOMCHL001471	0.12781	0.1413	1.1052	0.09362	0.1411	1.5069	0.04962	0.1707	3.4405	0.05085	0.2195	4.3171
R_HOMCHL001474	0.00934	0.1208	12.9395	0.01281	0.1123	8.7654	0.00436	0.1778	40.7979	0.00755	0.1511	20.0168
R_HOMCHL001481	0.04629	0.1439	3.1086	0.05665	0.1595	2.8156	0.00566	0.1919	33.917	0.00277	0.1649	59.5854
R_HOMCHL001484	0.0633	0.0811	1.2807	0.04749	0.0948	1.997	0.00321	0.1309	40.8027	0.00551	0.1574	28.577
R_HOMCHL001498	0.01249	0.1031	8.2567	0.0353	0.1096	3.1038	0.00469	0.1351	28.8285	0.00224	0.1066	47.5136
R_HOMCHL001505	0.12234	0.0855	0.6986	0.06982	0.1013	1.4503	0.0065	0.1353	20.8182	0.02544	0.1543	6.069
R_HOMCHL001506	0.10821	0.075	0.6934	0.07639	0.0871	1.1402	0.01666	0.1278	7.675	0.00205	0.0904	44.141
R_HOMCHL001512	0.00972	0.1009	10.3761	0.04875	0.0777	1.5942	0.00272	0.1189	43.7157	0.0024	0.1167	48.5513
R_HOMCHL001517	0.08081	0.1687	2.0876	0.0684	0.1456	2.129	0.00432	0.2046	47.3514	0.04831	0.1878	3.8864
R_HOMCHL001526	0.03919	0.0922	2.3526	0.05518	0.122	2.2114	0.02973	0.3812	12.8207	0.00583	0.2092	35.8701
R_HOMCHL001536	0.04492	0.0955	2.126	0.04838	0.0827	1.7087	0.00372	0.1094	29.436	0.00281	0.1389	49.4882
R_HOMCHL001539	0.09223	0.0817	0.8855	0.0252	0.1151	4.5677	0.01096	0.167	15.2427	0.00202	0.1238	61.3084
R_HOMCHL001550	0.0886	0.0742	0.8379	0.073	0.0798	1.093	0.03388	0.1578	4.6579	0.05176	0.119	2.2978
R_HOMCHL001552	0.14535	0.169	1.1628	0.07609	0.171	2.2471	0.00554	0.2551	46.0073	0.00418	0.2039	48.8055
R_HOMCHL001556	0.11088	0.1661	1.4981	0.08446	0.1658	1.9627	0.05431	0.2047	3.7693	0.00722	0.2865	39.6576
R_HOMCHL001560	0.15494	0.129	0.8323	0.08936	0.1716	1.9197	0.00971	0.1437	14.8034	0.00735	0.2472	33.6452
R_HOMCHL001563	0.12476	0.1413	1.1326	0.11894	0.1487	1.2506	0.01676	0.1947	11.619	0.04864	0.1855	3.8151
R_HOMCHL001574	0.00438	0.0981	22.4245	0.02825	0.1206	4.2701	0.0082	0.1452	17.7165	0.00373	0.1358	36.4448
R_HOMCHL001575	0.09405	0.0856	0.9105	0.04011	0.1032	2.5725	0.01078	0.106	9.8296	0.04189	0.1233	2.9434
R_HOMCHL001577	0.00425	0.1281	30.166	0.0051	0.1462	28.6447	0.01041	0.2851	27.4007	0.00263	0.1441	54.8308
R_HOMCHL001591	0.05477	0.0928	1.6937	0.07662	0.109	1.4226	0.09965	0.1536	1.5415	0.00148	0.0978	66.3132
R_HOMCHL001601	0.04731	0.0915	1.933	0.03354	0.1116	3.3274	0.00437	0.1482	33.9512	0.00466	0.1	21.4491
R_HOMCHL001610	0.07312	0.0975	1.3341	0.06565	0.1018	1.5506	0.01518	0.1376	9.0656	0.06967	0.1999	2.87
R_HOMCHL001616	0.04766	0.1153	2.4187	0.01959	0.1139	5.8162	0.01173	0.1387	11.8288	0.02531	0.1992	7.8719
R_HOMCHL001619	0.07211	0.1288	1.7864	0.07803	0.1738	2.227	0.0432	0.1665	3.8536	0.03872	0.1293	3.3392
R_HOMCHL001622	0.00893	0.124	13.883	0.12808	0.1417	1.106	0.00349	0.1714	49.0994	0.00317	0.1411	44.4407
R_HOMCHL001625	0.00506	0.1229	24.271	0.00643	0.1533	23.8495	0.00445	0.1585	35.6122	0.004	0.1852	46.3049
R_HOMCHL001629	0.12925	0.1269	0.9815	0.12911	0.1193	0.9242	0.05141	0.1594	3.1009	0.00288	0.1623	56.3805
R_HOMCHL001630	0.07096	0.0636	0.8958	0.04575	0.062	1.3549	0.00181	0.0838	46.3948	0.00258	0.0992	38.3648
R_HOMCHL001633	0.10854	0.0851	0.7837	0.0457	0.1346	2.9449	0.00328	0.1533	46.7209	0.01024	0.1503	14.687
R_HOMCHL001637	0.03311	0.1002	3.0265	0.0352	0.0964	2.7389	0.0189	0.1303	6.8955	0.04226	0.2588	6.1222
R_HOMCHL001640	0.20036	0.1513	0.755	0.07169	0.1429	1.9937	0.00582	0.2008	34.4924	0.00526	0.2197	41.784
R_HOMCHL001643	0.09655	0.0995	1.0305	0.01945	0.1023	5.2622	0.01385	0.1332	9.6212	0.0059	0.1816	30.7638
R_HOMCHL001652	0.09757	0.1268	1.2997	0.0819	0.1235	1.5076	0.09852	0.2114	2.1459	0.006	0.2821	47.0063
R_HOMCHL001655	0.05825	0.1461	2.5084	0.08595	0.2047	2.3817	0.00604	0.3741	61.9639	0.048	0.2124	4.4245
R_HOMCHL001662	0.00827	0.1396	16.8807	0.00566	0.136	24.0437	0.0048	0.1671	34.823	0.00294	0.1275	43.3524
R_HOMCHL001664	0.02241	0.1327	5.9212	0.05384	0.108	2.0062	0.00759	0.2109	27.7895	0.00232	0.1381	59.6534
R_HOMCHL001668	0.00639	0.1238	19.3648	0.0607	0.1244	2.0488	0.00416	0.1816	43.6149	0.00397	0.1884	47.5074
R_HOMCHL001671	0.00779	0.1705	21.898	0.04247	0.1585	3.7326	0.00495	0.3424	69.1725	0.00803	0.57	70.9397
R_HOMCHL001672	0.00924	0.1331	14.4049	0.01717	0.2324	13.5348	0.01178	0.3216	27.2979	0.00742	0.4599	62.0181
R_HOMCHL001674	0.0051	0.1172	22.9727	0.01	0.1569	15.6905	0.00734	0.2276	31.029	0.00735	0.2276	31.029
R_HOMCHL001678	0.00624	0.1625	26.0425	0.14177	0.1799	1.2689	0.00575	0.2289	39.8045	0.01893	0.2364	12.4938
R_HOMCHL001687	0.06942	0.0616	0.8874	0.02727	0.0781	2.8655	0.00146	0.064	43.8075	0.00185	0.068	36.8126
R_HOMCHL001689	0.00408	0.0939	23.0458	0.04981	0.0965	1.9367	0.00867	0.1394	16.078	0.00206	0.1332	64.5182
R_HOMCHL001690	0.00742	0.1261	16.9882	0.03887	0.132	3.3954	0.02438	0.3405	13.9648	0.00762	0.1838	24.137
R_HOMCHL001706	0.04863	0.0767	1.577	0.03825	0.075	1.9607	0.01036	0.1169	11.2811	0.00426	0.26	60.9736
R_HOMCHL001716	0.0079	0.1679	21.2363	0.00638	0.1719	26.9274	0.01564	0.3032	19.3879	0.00903	0.2576	28.5333
R_HOMCHL001722	0.02978	0.0905	3.04	0.04756	0.0844	1.7752	0.01711	0.1061	6.1992	0.01391	0.0882	6.3423
R_HOMCHL001725	0.0979	0.0832	0.85	0.07303	0.0967	1.3235	0.00917	0.0952	10.3724	0.0366	0.1289	3.5205
R_HOMCHL001726	0.00698	0.1401	20.0739	0.04892	0.147	3.0039	0.00517	0.3351	64.8373	0.05515	0.3478	6.3059
R_HOMCHL001727	0.05496	0.1117	2.032	0.08233	0.1315	1.5965	0.04095	0.1984	4.8458	0.00272	0.1349	49.6459
R_HOMCHL001734	0.07255	0.0842	1.16	0.0581	0.0921	1.5855	0.06134	0.1256	2.047	0.00225	0.0923	41.0543
R_HOMCHL001735	0.02519	0.0824	3.2707	0.03871	0.1116	2.883	0.02432	0.1274	5.2377	0.00319	0.1164	36.455
R_HOMCHL001742	0.00382	0.0929	24.3418	0.0128	0.1171	9.1516	0.00414	0.1621	39.1765	0.00369	0.1923	52.0802
R_HOMCHL001751	0.09957	0.0634	0.6366	0.0517	0.069	1.3341	0.00192	0.0919	47.7988	0.00172	0.0809	47.0322
R_HOMCHL001754	0.00861	0.1332	15.4701	0.005	0.1296	25.9238	0.00752	0.1669	22.1938	0.03265	0.1429	4.3758
R_HOMCHL001758	0.04186	0.1423	3.3994	0.06761	0.1744	2.5797	0.15826	0.2269	1.4339	0.03595	0.3301	9.1808
R_HOMCHL001762	0.00497	0.0944	19.0093	0.00731	0.1229	16.7998	0.00596	0.2078	34.8595	0.00332	0.1668	50.2855
R_HOMCHL001770	0.00856	0.1195	13.9576	0.02998	0.0921	3.0713	0.0093	0.1352	14.535	0.00631	0.1695	26.8383
R_HOMCHL001781	0.07566	0.0815	1.0777	0.05781	0.1144	1.9785	0.01706	0.1062	6.2267	0.01487	0.1226	8.2445
R_HOMCHL001782	0.0043	0.1114	25.9271	0.04204	0.1099	2.6145	0.00697	0.1652	23.6916	0.00307	0.1621	52.7616
R_HOMCHL001790	0.00578	0.1078	18.664	0.0063	0.1284	20.3894	0.00389	0.1364	35.0508	0.00455	0.2238	49.1501
R_HOMCHL001791	0.00893	0.1568	17.57	0.06635	0.1743	2.6276	0.03866	0.4994	12.9172	0.01094	0.2912	26.6226
R_HOMCHL001793	0.06079	0.1225	2.0154	0.0678	0.127	1.873	0.10854	0.1286	1.1842
R_HOMCHL001805	0.00446	0.1057	23.6969	0.09309	0.0992	1.066	0.01233	0.1546	12.5406	0.03064	0.1522	4.9657
R_HOMCHL001808	0.09	0.0671	0.7455	0.08064	0.0854	1.059	0.00542	0.0669	12.356	0.00119	0.067	56.1735
R_HOMCHL001813	0.07011	0.0744	1.0617	0.04344	0.073	1.6817	0.00491	0.2163	44.0428	0.03841	0.1213	3.1593
R_HOMCHL001817	0.07655	0.0819	1.0696	0.05416	0.0911	1.6816	0.00777	0.1228	15.8051	0.02709	0.1428	5.27
R_HOMCHL001819	0.0824	0.1095	1.3293	0.08693	0.1088	1.2513	0.0434	0.1354	3.1199	0.01103	0.1607	14.5714
R_HOMCHL001824	0.00623	0.1263	20.2776	0.0056	0.1251	22.347	0.00566	0.1251	22.347	0.0065	0.2515	38.7295
R_HOMCHL001829	0.01074	0.0987	9.1946	0.03205	0.0671	2.0928	0.00311	0.1106	35.5883	0.00357	0.1288	36.0752
R_HOMCHL001836	0.0528	0.1092	2.0685	0.03896	0.0955	2.4506	0.0044	0.1604	36.4248	0.00529	0.2766	52.2721
R_HOMCHL001843	0.0378	0.1061	2.8072	0.08634	0.1241	1.4371	0.1113	0.2155	1.936	0.07778	0.212	2.7263
R_HOMCHL001844	0.00998	0.1594	15.9792	0.04905	0.1415	2.8855	0.00472	0.204	43.2033	0.05095	0.2395	4.7005
R_HOMCHL001855	0.00585	0.126	21.5288	0.00572	0.1366	23.878	0.01226	0.2352	19.1864	0.00433	0.1762	40.7063
R_HOMCHL001861	0.00425	0.108	25.3909	0.0038	0.1039	27.3014	0.00393	0.1767	44.9353	0.00316	0.1699	53.692
R_HOMCHL001863	0.04221	0.0962	2.2801	0.07532	0.1403	1.8622	0.07296	0.3077	4.2175	0.02536	0.1646	6.4916
R_HOMCHL001865	0.08249	0.128	1.5516	0.0682	0.133	1.9502	0.04209	0.148	3.5156	0.01468	0.1459	9.9339
R_HOMCHL001867	0.00431	0.0998	23.1656	0.03391	0.0922	2.7198	0.00295	0.1274	43.4309	0.00293	0.1274	43.4309
R_HOMCHL001875	0.00532	0.0899	16.9061	0.00589	0.1081	18.3307	0.00284	0.1379	48.5104	0.00321	0.1707	53.2253
R_HOMCHL001877	0.0056	0.1447	25.8564	0.0047	0.1531	32.5768	0.05752	0.1656	2.879	0.00486	0.2139	44.0085
R_HOMCHL001882	0.05415	0.1241	2.2925	0.05531	0.1157	2.0924	0.00665	0.1256	18.8675	0.00437	0.1767	40.4005
R_HOMCHL001884	0.00525	0.1	19.0559	0.01925	0.094	4.8814	0.00433	0.1605	37.0483	0.00306	0.1258	41.1021
R_HOMCHL001885	0.05505	0.1507	2.7369	0.06051	0.1549	2.5597	0.02356	0.1905	8.0855	0.00425	0.1927	45.3839
R_HOMCHL001890	0.03071	0.143	4.6559	0.08578	0.1159	1.3508	0.00449	0.1767	39.3553	0.00512	0.2466	48.2049
R_HOMCHL001893	0.05832	0.1022	1.7518	0.06704	0.1072	1.5987	0.11939	0.1828	1.5305
R_HOMCHL001895	0.00785	0.1745	22.2339	0.00818	0.1967	24.0563	0.00605	0.2622	43.3766	0.00547	0.2312	42.2641
R_HOMCHL001896	0.02578	0.159	6.1674	0.03206	0.1193	3.7206	0.02075	0.2366	11.4014	0.02046	0.2086	10.1948
R_HOMCHL001897	0.0024	0.08	33.3149	0.00219	0.0802	36.5945	0.00234	0.1128	48.1019	0.00237	0.1128	48.1019
R_HOMCHL001899	0.0093	0.2163	23.2423	0.10337	0.2579	2.4951	0.00589	0.3804	64.5947	0.00851	0.5456	64.1085
R_HOMCHL001905	0.0086	0.1548	18.0071	0.06746	0.1748	2.5916	0.00442	0.1772	40.1276
R_HOMCHL001907	0.1035	0.0736	0.7109	0.05445	0.0708	1.2994	0.00311	0.0861	27.6574	0.01862	0.0803	4.3137
R_HOMCHL001909	0.02194	0.1086	4.9505	0.0606	0.111	1.8314	0.00341	0.1535	45.0701	0.00389	0.1538	39.532
R_HOMCHL001912	0.00404	0.0813	20.1135	0.02941	0.0742	2.5225	0.00259	0.1093	42.2678	0.00219	0.1017	46.3488
R_HOMCHL001914	0.03525	0.114	3.2345	0.05687	0.1322	2.325	0.00341	0.1075	31.5191	0.00402	0.1853	46.1058
R_HOMCHL001915	0.00619	0.1364	22.0313	0.00755	0.1547	20.4824	0.00957	0.1865	19.4901	0.00418	0.2053	49.1357
R_HOMCHL001917	0.00371	0.1122	30.2581	0.06371	0.1292	2.0282	0.00394	0.1951	49.4843	0.00421	0.1241	29.438
R_HOMCHL001946	0.00789	0.1744	22.0997	0.08975	0.1819	2.0264	0.01755	0.2339	13.3283	0.11578	0.529	4.5688
R_HOMCHL001948	0.05628	0.0424	0.7533	0.0348	0.0372	1.0705	0.02581	0.047	1.8205	0.02187	0.054	2.4698
R_HOMCHL001955	0.06418	0.0717	1.1178	0.04914	0.0748	1.5217	0.00286	0.1153	40.293	0.07369	0.0839	1.1388
R_HOMCHL001956	0.00578	0.1156	19.996	0.07249	0.1476	2.0364	0.00543	0.3043	56.0553	0.02956	0.2969	10.0421
R_HOMCHL001959	0.11153	0.1179	1.0571	0.05037	0.1643	3.2621	0.0042	0.1398	33.2614	0.00693	0.2346	33.8766
R_HOMCHL001965	0.0065	0.1441	22.1681	0.00492	0.1309	26.5787	0.00389	0.1606	41.315	0.00325	0.1098	33.7359
R_HOMCHL001972	0.07511	0.1139	1.5166	0.08859	0.1498	1.6907	0.03791	0.1594	4.2039	0.0841	0.2848	3.3874
R_HOMCHL001981	0.13334	0.1539	1.1542	0.0602	0.1735	2.8828	0.07237	0.2121	2.9314	0.06245	0.2093	3.3513
R_HOMCHL001985	0.01273	0.1108	8.6982	0.07122	0.1028	1.4435	0.00346	0.1174	33.9493
R_HOMCHL001988	0.00945	0.1534	16.2355	0.06948	0.1344	1.934	0.00479	0.1781	37.2018	0.04047	0.2157	5.3305
R_HOMCHL001995	0.04734	0.1185	2.5038	0.06226	0.108	1.7343	0.02451	0.1324	5.4038	0.00406	0.1615	39.8041
R_HOMCHL002007	0.09471	0.1197	1.2641	0.08424	0.1062	1.261	0.09457	0.0894	0.9456	0.05434	0.2109	3.8803
R_HOMCHL002011	0.03742	0.1093	2.9201	0.04513	0.0977	2.1658	0.00842	0.1281	15.2218	0.09222	0.165	1.7889
R_HOMCHL002021	0.00831	0.1807	21.7314	0.05576	0.1619	2.9043	0.00601	0.2831	47.1261
R_HOMCHL002024	0.07754	0.0966	1.2459	0.07628	0.0999	1.3093	0.00253	0.1104	43.6429	0.00439	0.1974	44.958
R_HOMCHL002025	0.09746	0.0707	0.7252	0.04959	0.1128	2.2752	0.00555	0.1379	24.8709	0.00257	0.1386	53.8638
R_HOMCHL002033	0.0078	0.1564	20.0448	0.01435	0.2621	18.2616	0.00855	0.2255	26.3706	0.00383	0.2044	53.4348
R_HOMCHL002040	0.09371	0.2194	2.3413	0.14061	0.179	1.2732	0.01135	0.3416	30.0854	0.00576	0.2728	47.3843
R_HOMCHL002041	0.05524	0.0989	1.7911	0.04556	0.0836	1.8361	0.02846	0.1027	3.6094	0.01189	0.0971	8.1666
R_HOMCHL002048	0.00527	0.1297	24.6226	0.00526	0.1297	24.6226	0.09411	0.2232	2.3719	0.00487	0.2139	43.9064
R_HOMCHL002051	0.00722	0.1698	23.52	0.05376	0.1616	3.0062	0.00549	0.218	39.6978	0.00936	0.6129	65.5102
R_HOMCHL002053	0.0105	0.1752	16.69	0.00815	0.153	18.7781	0.00389	0.1918	49.2395	0.00335	0.1986	59.2942
R_HOMCHL002062	0.07206	0.0797	1.1065	0.05189	0.0833	1.6054	0.00312	0.24	76.8054	0.00121	0.0771	63.4939
R_HOMCHL002074	0.14612	0.1504	1.029	0.04591	0.1362	2.9673	0.07784	0.1519	1.9517	0.15486	0.1831	1.1825
R_HOMCHL002097	0.00367	0.0952	25.9577	0.00385	0.1073	27.8457	0.04957	0.1283	2.5873	0.00205	0.1188	58.0341
R_HOMCHL002099	0.11311	0.1366	1.2077	0.09522	0.1964	2.0631	0.0409	0.1718	4.1998	0.00399	0.163	40.833
R_HOMCHL002103	0.06659	0.1124	1.6873	0.05752	0.0926	1.6108	0.06498	0.1421	2.1876	0.05918	0.1731	2.9257
R_HOMCHL002112	0.00787	0.1617	20.5389	0.03183	0.1384	4.3487	0.00909	0.2269	24.9621	0.00541	0.2077	38.398
R_HOMCHL002113	0.00854	0.158	18.4965	0.08724	0.147	1.6848	0.00501	0.2207	44.0146	0.00627	0.2515	40.1266
R_HOMCHL002115	0.04694	0.1475	3.142	0.06015	0.1407	2.339	0.01357	0.269	19.8248	0.00482	0.3031	62.8802
R_HOMCHL002129	0.04688	0.0824	1.7574	0.06017	0.1077	1.7894	0.0125	0.925	73.999	0.04984	0.3671	7.3674
R_HOMCHL002131	0.06331	0.0918	1.4502	0.04228	0.0861	2.0362	0.00309	0.0713	23.0466	0.02795	0.139	4.9736
R_HOMCHL002132	0.04928	0.1293	2.6231	0.09604	0.1654	1.7226	0.01336	0.161	12.0571	0.00488	0.2198	45.063
R_HOMCHL002134	0.09051	0.1517	1.6755	0.08877	0.1447	1.6298	0.03972	0.1378	3.4701	0.03351	0.149	4.4456
R_HOMCHL002148	0.02947	0.0726	2.4654	0.0246	0.0459	1.866	0.00139	0.0504	36.2011	0.00193	0.0821	42.5979
R_HOMCHL002150	0.00696	0.1419	20.3296	0.00701	0.1419	20.3296	0.00396	0.1684	42.5672	0.00542	0.1687	31.1401
R_HOMCHL002174	0.00757	0.0554	7.3233	0.00847	0.0579	6.8324	0.00255	0.1053	41.3271	0.02683	0.0856	3.1924
R_HOMCHL002176	0.02197	0.109	4.9593	0.0541	0.0952	1.7598	0.00251	0.1058	42.1007	0.00273	0.1433	52.5616
R_HOMCHL002181	0.1035	0.1239	1.1969	0.07029	0.1364	1.9409	0.0034	0.1554	45.7693	0.00326	0.1718	52.7293
R_HOMCHL002186	0.04169	0.1444	3.4645	0.06394	0.1395	2.1817	0.01034	0.1806	17.4671	0.00425	0.1969	46.2832
R_HOMCHL002189	0.05318	0.0889	1.6728	0.01809	0.0719	3.9745	0.0143	0.0912	6.3746	0.00418	0.068	16.2455
R_HOMCHL002190	0.00361	0.1039	28.8117	0.03096	0.1153	3.7245	0.00485	0.132	27.2249	0.00659	0.324	49.1453
R_HOMCHL002193	0.00757	0.1667	22.0081	0.07612	0.1759	2.3106	0.11797	0.447	3.7891	0.00602	0.394	65.4752
R_HOMCHL002195	0.00812	0.1518	18.6952	0.10658	0.1504	1.4112	0.00563	0.206	36.5803	0.03142	0.2213	7.0439
R_HOMCHL002199	0.07834	0.0694	0.8856	0.07174	0.1162	1.6196	0.03094	0.1168	3.7749	0.03185	0.0952	2.9893
R_HOMCHL002200	0.03403	0.1259	3.6992	0.04773	0.1192	2.4978	0.00507	0.2126	41.9314	0.01621	0.2437	15.0366
R_HOMCHL002201	0.00487	0.0989	20.299	0.00407	0.1136	27.888	0.00469	0.1374	29.3087	0.00424	0.2407	56.7743
R_HOMCHL002204	0.02664	0.0748	2.806	0.01701	0.0686	4.0314	0.03464	0.0954	2.756	0.00261	0.1618	62.0769
R_HOMCHL002217	0.00654	0.1316	20.1141	0.08914	0.1571	1.7625	0.00517	0.2988	57.7541	0.00534	0.3874	72.5095
R_HOMCHL002226	0.00919	0.1373	14.9297	0.02048	0.1839	8.9776	0.00802	0.2844	35.4538	0.23963	0.3727	1.5549
R_HOMCHL002228	0.06095	0.1163	1.9083	0.04582	0.1305	2.8469	0.008	0.2225	27.8187	0.00759	0.2034	26.7965
R_HOMCHL002232	0.09462	0.0641	0.6777	0.05274	0.0718	1.3604	0.00219	0.1058	48.2694	0.0025	0.0887	35.4132
R_HOMCHL002236	0.09186	0.1283	1.3965	0.0605	0.1819	3.0066	0.14591	0.2437	1.6703	0.17886	0.202	1.1295
R_HOMCHL002237	0.00643	0.1568	24.3867	0.00572	0.2221	38.8363	0.01825	0.254	13.9162	0.00819	0.4296	52.4418
R_HOMCHL002240	0.01108	0.1616	14.5897	0.00759	0.1799	23.7001	0.00534	0.2289	42.8805	0.00563	0.3814	67.7561
R_HOMCHL002248	0.00516	0.1246	24.1573	0.05733	0.1473	2.569	0.00335	0.1421	42.4784	0.01642	0.1347	8.1983
R_HOMCHL002254	0.02292	0.0885	3.8597	0.0606	0.1203	1.985	0.00308	0.1012	32.8188	0.03111	0.1212	3.896
R_HOMCHL002257	0.00462	0.0972	21.0558	0.0047	0.1065	22.6616	0.00287	0.1399	48.6939	0.00309	0.1845	59.7417
R_HOMCHL002260	0.00351	0.0858	24.4822	0.03351	0.0829	2.4731	0.00326	0.1074	33.002	0.00238	0.1203	50.6133
R_HOMCHL002261	0.03426	0.0622	1.8168	0.02325	0.0705	3.0313	0.00267	0.1186	44.4587	0.00497	0.1718	34.6027
R_HOMCHL002263	0.10484	0.0679	0.6476	0.04673	0.0763	1.6329	0.05698	0.0923	1.6201	0.01351	0.09	6.6661
R_HOMCHL002264	0.00736	0.1644	22.3339	0.09647	0.1887	1.9557	0.07389	0.2621	3.5462	0.00614	0.2576	41.9541
R_HOMCHL002267	0.00489	0.1055	21.5811	0.045	0.1096	2.4344	0.00338	0.1604	47.381	0.0311	0.1361	4.3787
R_HOMCHL002271	0.00873	0.1724	19.7519	0.01966	0.2198	11.182	0.00835	0.2483	29.7506	0.00778	0.5022	64.5658
R_HOMCHL002272	0.01185	0.1431	12.0726	0.02564	0.1462	5.7002	0.0052	0.2037	39.1567	0.08162	0.1619	1.9832
R_HOMCHL002277	0.05082	0.0967	1.9032	0.0898	0.1222	1.3612	0.08478	0.1595	1.8812	0.06548	0.5069	7.7404
R_HOMCHL002278	0.00803	0.1418	17.6513	0.0588	0.1836	3.1223	0.00645	0.2597	40.2547	0.01031	0.1728	16.763
R_HOMCHL002280	0.05219	0.1459	2.7954	0.05682	0.1328	2.3373	0.00489	0.1972	40.3563	0.01151	0.2327	20.2201
R_HOMCHL002286	0.04633	0.087	1.877	0.02861	0.0715	2.4989	0.00182	0.0861	47.1993	0.00732	0.0873	11.9377
R_HOMCHL002288	0.07752	0.0767	0.9888	0.05786	0.0797	1.3774	0.03488	0.0684	1.96	0.01857	0.046	2.4793
R_HOMCHL002293	0.00642	0.1415	22.0632	0.12508	0.1418	1.1335	0.00523	0.17	32.5209	0.00435	0.1411	32.4242
R_HOMCHL002303	0.00552	0.1193	21.6309	0.03426	0.1265	3.6924	0.01428	0.1483	10.385	0.00464	0.2161	46.5778
R_HOMCHL002305	0.00548	0.1662	30.3434	0.00905	0.1688	18.6409	0.11099	0.2286	2.0595	0.01817	0.2224	12.2381
R_HOMCHL002306	0.00658	0.0902	13.7016	0.03119	0.078	2.5014	0.03911	0.1529	3.9078	0.0021	0.1579	75.1217
R_HOMCHL002310	0.00549	0.1458	26.5629	0.01378	0.1246	9.0419	0.00578	0.2282	39.4963	0.00519	0.2015	38.7936
R_HOMCHL002313	0.005	0.1233	24.6562	0.00579	0.1244	21.4654	0.00351	0.1734	49.3554	0.00477	0.2274	47.692
R_HOMCHL002317	0.01781	0.1426	8.0076	0.00366	0.1098	30.0369	0.00423	0.1569	37.1035	0.00391	0.1482	37.8538
R_HOMCHL002324	0.104	0.103	0.9903	0.02694	0.1077	3.9964	0.00336	0.1841	54.8292	0.00355	0.2236	63.0262
R_HOMCHL002327	0.00437	0.1103	25.2207	0.0054	0.1424	26.3495	0.00809	0.3897	48.1509	0.0396	0.2576	6.5047
R_HOMCHL002338	0.00556	0.1459	26.2208	0.03355	0.1343	4.002	0.00582	0.2029	34.8503	0.00375	0.2567	68.4133
R_HOMCHL002340	0.1087	0.1364	1.255	0.07359	0.1582	2.1497	0.06121	0.458	7.4816	0.02717	0.2147	7.9008
R_HOMCHL002347	0.06003	0.1234	2.0564	0.02357	0.1198	5.0829	0.0041	0.1534	37.451	0.02436	0.3145	12.908
R_HOMCHL002361	0.00825	0.1143	13.8518	0.01763	0.1554	8.8162	0.00475	0.1776	37.4007	0.0026	0.1293	49.6437
R_HOMCHL002363	0.00587	0.1005	17.1118	0.0365	0.1706	4.675	0.00568	0.2318	40.7799	0.0026	0.1344	51.5949
R_HOMCHL002365	0.00646	0.1236	19.1217	0.05873	0.1433	2.4402	0.08095	0.2019	2.4945	0.10668	0.1997	1.8721
R_HOMCHL002366	0.03494	0.0765	2.1902	0.05426	0.0912	1.6801	0.03912	0.086	2.1995	0.07326	0.2087	2.8485
R_HOMCHL002380	0.07151	0.1658	2.3185	0.0057	0.1692	29.6916	0.00489	0.2276	46.5786	0.00329	0.2233	67.7924
R_HOMCHL002381	0.04254	0.1196	2.8116	0.03844	0.0875	2.2767	0.0035	0.1188	33.9357	0.00233	0.1318	56.4829
R_HOMCHL002387	0.00839	0.1503	17.9029	0.07331	0.1743	2.3778	0.00769	0.2912	37.851	0.01	0.4977	49.7599
R_HOMCHL002400	0.10303	0.1637	1.5892	0.11568	0.213	1.8414	0.01922	0.1885	9.8097	0.0051	0.2124	41.6527
R_HOMCHL002401	0.00527	0.1475	27.9842	0.05631	0.1551	2.755	0.0053	0.1475	27.9842	0.02775	0.2474	8.9155
R_HOMCHL002412	0.00657	0.1678	25.5389	0.10638	0.1658	1.5581	0.00496	0.1542	31.0886	0.02617	0.1422	5.4351
R_HOMCHL002414	0.06031	0.0834	1.3828	0.05509	0.0988	1.7942	0.01699	0.128	7.5382	0.00325	0.1578	48.529
R_HOMCHL002417	0.007	0.1434	20.4991	0.0123	0.1324	10.7674	0.00732	0.1695	23.1567
R_HOMCHL002424	0.00936	0.1643	17.5535	0.04876	0.1541	3.1598	0.01341	0.2419	18.043	0.10584	0.2776	2.6225
R_HOMCHL002425	0.00771	0.1528	19.8216	0.00593	0.1451	24.481	0.00585	0.2394	40.9299	0.00545	0.2418	44.4106
R_HOMCHL002428	0.05786	0.0829	1.4325	0.05131	0.0675	1.3156	0.0431	0.09	2.0891	0.00215	0.0966	44.8788
R_HOMCHL002432	0.06498	0.1867	2.8729	0.12762	0.2634	2.064	0.17007	0.4556	2.6788	0.00599	0.2232	37.2348
R_HOMCHL002433	0.00521	0.0953	18.3003	0.04329	0.1053	2.4315	0.00332	0.1389	41.9057	0.06268	0.1379	2.2
R_HOMCHL002436	0.00791	0.1682	21.2645	0.05537	0.1421	2.5667	0.00445	0.1676	37.6667	0.00497	0.2007	40.3729
R_HOMCHL002441	0.00537	0.1109	20.6651	0.03913	0.1407	3.5972	0.00697	0.2308	33.1059	0.00392	0.175	44.6264
R_HOMCHL002471	0.00714	0.1372	19.222	0.00603	0.1533	25.4088	0.0057	0.3627	63.6645	0.04628	0.4047	8.7473
R_HOMCHL002482	0.00944	0.1555	16.4762	0.00781	0.1699	21.7377	0.00664	0.2372	35.7342	0.01372	0.243	17.7128
R_HOMCHL002488	0.04422	0.1155	2.6129	0.03987	0.1287	3.2277	0.00359	0.1896	52.8886	0.02853	0.2016	7.0661
R_HOMCHL002489	0.01297	0.0855	6.5935	0.05391	0.0849	1.5749	0.00535	0.0926	17.308	0.00264	0.1123	42.4822
R_HOMCHL002492	0.11451	0.099	0.8642	0.06431	0.1288	2.0033	0.00335	0.1444	43.3639	0.00333	0.1444	43.3639
R_HOMCHL002493	0.00344	0.0865	25.1316	0.0042	0.138	32.8262	0.09332	0.1605	1.7206	0.00484	0.1327	27.4299
R_HOMCHL002496	0.04047	0.1277	3.1561	0.03724	0.1035	2.7799	0.00405	0.1742	42.9821	0.00338	0.1868	55.2262
R_HOMCHL002497	0.00614	0.1273	20.7365	0.05148	0.1454	2.8245	0.00474	0.2846	60.0104	0.0051	0.2359	46.2355
R_HOMCHL002498	0.02348	0.0953	4.0571	0.02557	0.1011	3.9544	0.07636	0.1443	1.889	0.01943	0.1055	5.4293
R_HOMCHL002512	0.01441	0.1167	8.0989	0.0781	0.131	1.6779	0.00591	0.1461	24.731	0.00302	0.1244	41.1536
R_HOMCHL002517	0.09226	0.1148	1.2444	0.04067	0.1257	3.0901	0.00605	0.1803	29.7984	0.00518	0.2224	42.9033
R_HOMCHL002521	0.00642	0.1304	20.3184	0.00621	0.1209	19.4536	0.05185	0.2006	3.8695	0.0873	0.3517	4.0279
R_HOMCHL002522	0.00758	0.1575	20.7948	0.03236	0.1804	5.5735	0.15113	0.6131	4.0568
R_HOMCHL002527	0.00598	0.1361	22.7447	0.00525	0.1433	27.2639	0.03706	0.1684	4.5447
R_HOMCHL002528	0.00857	0.1484	17.3278	0.02647	0.1453	5.4872	0.00387	0.1547	40.0015	0.00285	0.1623	57.047
R_HOMCHL002532	0.00565	0.111	19.6323	0.06975	0.1012	1.4505	0.00276	0.0949	34.3962	0.00458	0.2695	58.801
R_HOMCHL002536	0.00627	0.1401	22.367	0.00741	0.1312	17.7049	0.01625	0.1681	10.35	0.00431	0.2083	48.3565
R_HOMCHL002546	0.12072	0.1401	1.161	0.10296	0.146	1.4182	0.08069	0.1701	2.1088	0.03012	0.1966	6.5246
R_HOMCHL002547	0.01	0.181	18.1015	0.00704	0.1861	26.4369	0.00575	0.3211	55.8527	0.00707	0.1861	26.4369
R_HOMCHL002548	0.02101	0.0861	4.0971	0.0075	0.0734	9.7937	0.00348	0.1081	31.0752	0.0014	0.0753	53.7011
R_HOMCHL002552	0.00621	0.1174	18.8952	0.0398	0.1043	2.6197	0.00603	0.2377	39.4363	0.05135	0.1865	3.6308
R_HOMCHL002553	0.08781	0.1296	1.4756	0.05709	0.1525	2.6713	0.00806	0.2183	27.0999	0.00741	0.1922	25.9559
R_HOMCHL002554	0.09678	0.1117	1.1539	0.05982	0.1245	2.0817	0.00544	0.1655	30.4089	0.06099	0.1923	3.1528
R_HOMCHL002563	0.05793	0.142	2.4513	0.07735	0.1526	1.9724	0.04961	0.2242	4.5199
R_HOMCHL002567	0.00653	0.1593	24.4019	0.0075	0.1653	22.0355	0.00635	0.2114	33.3113	0.00569	0.2097	36.8907
R_HOMCHL002570	0.00832	0.1634	19.6409	0.01266	0.1641	12.962	0.00598	0.3039	51.077	0.00595	0.3039	51.077
R_HOMCHL002574	0.00651	0.162	24.8687	0.03855	0.1374	3.5652	0.00718	0.256	35.6481	0.03296	0.3623	10.99
R_HOMCHL002584	0.00529	0.1421	26.8529	0.00568	0.152	26.7549	0.01408	0.3099	22.012	0.00482	0.2262	46.9179
R_HOMCHL002595	0.02706	0.1343	4.9628	0.03532	0.1242	3.5167	0.00642	0.1948	30.3447	0.00607	0.1522	25.0901
R_HOMCHL002602	0.00909	0.1654	18.1876	0.00873	0.2305	26.4003	0.00633	0.2929	46.277	0.00525	0.214	40.77
R_HOMCHL002606	0.01105	0.1552	14.0461	0.08092	0.1701	2.1018	0.02118	0.1812	8.5552	0.00596	0.4013	67.3867
R_HOMCHL002613	0.07007	0.0954	1.3617	0.0812	0.1052	1.2959	0.08618	0.2497	2.8978	0.0028	0.147	52.5761
R_HOMCHL002615	0.00682	0.1619	23.7478	0.00518	0.1801	34.7532	0.00493	0.2246	45.5268	0.00536	0.3442	64.2764
R_HOMCHL002622	0.07046	0.165	2.3419	0.00635	0.1727	27.1815	0.00468	0.2151	45.9943	0.09033	0.3113	3.446
R_HOMCHL002623	0.00704	0.166	23.5808	0.09392	0.1988	2.1167	0.00908	0.2076	22.8709
R_HOMCHL002627	0.06364	0.1194	1.8758	0.05421	0.1143	2.1081	0.03197	0.1429	4.4701	0.00409	0.1465	35.7822
R_HOMCHL002630	0.07411	0.1015	1.3698	0.04918	0.1154	2.3475	0.01477	0.1903	12.8793	0.00399	0.161	40.3894
R_HOMCHL002639	0.00763	0.148	19.3851	0.06524	0.1443	2.2114	0.01005	0.4273	42.5252
R_HOMCHL002641	0.00807	0.1615	20.0286	0.00954	0.2148	22.5212	0.00861	0.2755	31.9871	0.02636	0.2992	11.3535
R_HOMCHL002642	0.00544	0.1359	25.0055	0.00714	0.1578	22.1195	0.00638	0.2292	35.9316	0.00397	0.1878	47.3357
R_HOMCHL002650	0.18545	0.1449	0.7811	0.08103	0.1618	1.9964	0.07151	0.2174	3.0404	0.11093	0.1012	0.9114
R_HOMCHL002651	0.00622	0.1086	17.4592	0.02945	0.1072	3.641	0.00443	0.1173	26.4625	0.0026	0.1214	46.6174
R_HOMCHL002653	0.0361	0.1998	5.5333	0.02823	0.1616	5.7252	0.00848	0.4142	48.8492	0.00808	0.497	61.5073
R_HOMCHL002656	0.00607	0.1044	17.1816	0.04601	0.0802	1.7443	0.00289	0.1076	37.2874	0.0812	0.1414	1.742
R_HOMCHL002657	0.00554	0.1214	21.9278	0.06476	0.1682	2.5975	0.01699	0.2632	15.4917	0.04352	0.4153	9.5415
R_HOMCHL002670	0.03786	0.1125	2.9709	0.03143	0.0999	3.1773	0.01097	0.1215	11.0821	0.04749	0.1138	2.3965
R_HOMCHL002671	0.03344	0.1249	3.7354	0.04715	0.1482	3.1433	0.0037	0.1892	51.1364
R_HOMCHL002675	0.00861	0.196	22.7743	0.01036	0.2027	19.5751	0.00654	0.2747	42.0004	0.01459	0.418	28.6411
R_HOMCHL002678	0.00508	0.0951	18.728	0.0289	0.0994	3.4387	0.00299	0.1201	40.1407	0.0031	0.1552	50.127
R_HOMCHL002685	0.00519	0.1375	26.5101	0.03028	0.1248	4.1209	0.00405	0.1737	42.9008	0.00727	0.3066	42.172
R_HOMCHL002690	0.01256	0.1851	14.7473	0.00554	0.1823	32.9275	0.00641	0.2986	46.5792	0.03071	0.4405	14.3412
R_HOMCHL002692	0.007	0.1517	21.6811	0.07058	0.1346	1.9067	0.01682	0.2948	17.5289	0.00457	0.2137	46.7615
R_HOMCHL002708	0.00653	0.15	22.989	0.01473	0.2036	13.8203	0.00511	0.2409	47.1529	0.00338	0.201	59.4736
R_HOMCHL002719	0.00592	0.1734	29.3074	0.00899	0.1755	19.5328	0.03207	0.2603	8.118	0.01844	0.5352	29.0203
R_HOMCHL002732	0.06385	0.0859	1.3458	0.04538	0.0894	1.9708	0.00453	0.1531	33.7929	0.05244	0.1105	2.1079
R_HOMCHL002734	0.01117	0.1777	15.9029	0.0226	0.1521	6.731	0.00998	0.2572	25.7797	0.05899	0.474	8.0351
R_HOMCHL002735	0.00541	0.1354	25.0499	0.05848	0.1315	2.2484	0.00592	0.1879	31.7516	0.13391	0.2265	1.6915
R_HOMCHL002737	0.0074	0.1273	17.2145	0.006	0.1421	23.6651	0.00642	0.2027	31.5548	0.00494	0.2012	40.7549
R_HOMCHL002741	0.00807	0.1861	23.0511	0.01383	0.2478	17.913	0.00526	0.1298	24.6593	0.32127	0.3729	1.1606
R_HOMCHL002742	0.00597	0.1266	21.2146	0.00893	0.1686	18.875	0.00409	0.1875	45.8631
R_HOMCHL002744	0.00901	0.1999	22.1855	0.00822	0.1547	18.8054	0.04563	0.1766	3.8699	0.02439	0.2979	12.2153
R_HOMCHL002749	0.04635	0.1409	3.0402	0.06118	0.1194	1.9517	0.17784	0.2126	1.1956	0.16105	0.5089	3.1601
R_HOMCHL002750	0.00993	0.189	19.0255	0.00634	0.1778	28.0361	0.00545	0.2283	41.917	0.01449	0.3416	23.58
R_HOMCHL002753	0.01327	0.1563	11.7762	0.00913	0.1365	14.9529	0.01125	0.1659	14.7486	0.00831	0.2126	25.5664
R_HOMCHL002755	0.00708	0.1417	20.0022	0.05524	0.1533	2.7755	0.00493	0.2075	42.0534
R_HOMCHL002759	0.09364	0.2014	2.1512	0.11622	0.1406	1.2094	0.0054	0.1673	31.0038	0.08337	0.2286	2.742
R_HOMCHL002760	0.00554	0.1431	25.859	0.10326	0.1641	1.5895	0.01145	0.3108	27.1421	0.00475	0.2019	42.5116
R_HOMCHL002762	0.00577	0.1335	23.1348	0.0047	0.1431	30.4818	0.06476	0.1621	2.5028	0.02931	0.2206	7.5269
R_HOMCHL002771	0.00479	0.1181	24.6604	0.04364	0.1176	2.6945	0.00265	0.1471	55.5214	0.00373	0.1465	39.2339
R_HOMCHL002773	0.00584	0.1447	24.7635	0.00905	0.1526	16.871	0.00525	0.1787	34.0362	0.0097	0.3365	34.6976
R_HOMCHL002778	0.00595	0.1374	23.0845	0.01927	0.1337	6.9384	0.00697	0.4502	64.5609	0.00675	0.2546	37.7041
R_HOMCHL002779	0.00532	0.1304	24.4977	0.05354	0.1114	2.0797	0.00349	0.153	43.8416	0.0044	0.2008	45.6317
R_HOMCHL002784	0.05428	0.146	2.6904	0.09663	0.1649	1.7064	0.00922	0.3347	36.2953	0.00504	0.1878	37.2282
R_HOMCHL002800	0.08067	0.1298	1.6086	0.07816	0.1375	1.7587	0.00595	0.237	39.8161	0.00551	0.2961	53.7381
R_HOMCHL002802	0.00977	0.154	15.762	0.08789	0.1709	1.9447	0.01988	0.2483	12.4932	0.00581	0.2581	44.3984
R_HOMCHL002809	0.00612	0.136	22.2088	0.00483	0.1352	27.984	0.00828	0.147	17.7535	0.00248	0.1427	57.5761
R_HOMCHL002816	0.00817	0.1628	19.9276	0.00736	0.1703	23.1362	0.00685	0.3504	51.1587	0.00423	0.2062	48.7035
R_HOMCHL002819	0.00812	0.19	23.3909	0.08356	0.2458	2.9418	0.00599	0.2583	43.1455	0.04665	0.3341	7.1615
R_HOMCHL002824	0.0323	0.1176	3.6403	0.04982	0.1337	2.6843	0.00542	0.2299	42.4018	0.00423	0.194	45.8821
R_HOMCHL002831	0.11188	0.1493	1.3341	0.09796	0.2203	2.249	0.08179	0.1924	2.3521	0.00401	0.2026	50.5358
R_HOMCHL002834	0.02349	0.0884	3.765	0.03806	0.0944	2.4796	0.00258	0.0987	38.3096	0.00228	0.1027	45.0447
R_HOMCHL002835	0.00667	0.1133	16.9813	0.00714	0.1116	15.6343	0.00441	0.1659	37.599	0.00403	0.2587	64.1815
R_HOMCHL002836	0.00847	0.1467	17.3186	0.01299	0.1466	11.2897	0.00541	0.2244	41.4907	0.01027	0.1703	16.5843
R_HOMCHL002838	0.09788	0.1042	1.065	0.10627	0.1264	1.1892	0.00304	0.1367	44.9285	0.01458	0.1509	10.3508
R_HOMCHL002840	0.01203	0.1867	15.5159	0.20545	0.1869	0.9096	0.11714	0.2912	2.4864	0.12684	0.3714	2.9277
R_HOMCHL002848	0.06351	0.1285	2.0239	0.05836	0.1257	2.1532	0.00436	0.21	48.1631	0.0051	0.2747	53.8652
R_HOMCHL002849	0.01766	0.0508	2.8787	0.00476	0.0438	9.1956	0.02722	0.0258	0.9467	0.02652	0.0398	1.5002
R_HOMCHL002861	0.05471	0.2097	3.8339	0.13722	0.2323	1.6928	0.20407	0.7514	3.6825	0.00639	0.2821	44.1585
R_HOMCHL002870	0.0069	0.148	21.4355	0.00659	0.1697	25.741	0.00568	0.2006	35.2962	0.00347	0.144	41.5226
R_HOMCHL002873	0.00758	0.1712	22.579	0.08461	0.1441	1.7033	0.01689	0.2344	13.8792	0.09001	0.3913	4.3474
R_HOMCHL002876	0.00687	0.1454	21.1715	0.00766	0.1636	21.35	0.00641	0.2606	40.6536	0.1474	0.2476	1.6797
R_HOMCHL002877	0.09854	0.1356	1.376	0.06887	0.1305	1.8947	0.00642	0.2305	35.9262	0.18254	0.5989	3.2807
R_HOMCHL002878	0.12134	0.0865	0.713	0.07027	0.09	1.2809	0.01094	0.1219	11.148	0.00416	0.1041	25.034
R_HOMCHL002883	0.12106	0.1543	1.2742	0.07445	0.1264	1.6984	0.06146	0.1565	2.5469	0.13316	0.3719	2.7927
R_HOMCHL002886	0.00875	0.1602	18.3234	0.06286	0.1497	2.3807	0.00743	0.2953	39.7438	0.0035	0.1533	43.8049
R_HOMCHL002890	0.26129	0.1273	0.487	0.08518	0.141	1.6553	0.00454	0.1919	42.2525	0.00745	0.4942	66.3068
R_HOMCHL002892	0.00573	0.1458	25.4629	0.00312	0.1174	37.583	0.00964	0.1422	14.764	0.00243	0.1339	55.0875
R_HOMCHL002894	0.0074	0.1544	20.8579	0.00717	0.1477	20.594	0.02474	0.2163	8.744	0.00265	0.1362	51.4358
R_HOMCHL002895	0.02612	0.1284	4.9174	0.05792	0.1498	2.5857	0.02073	0.2143	10.3344	0.00573	0.3677	64.1108
R_HOMCHL002897	0.00906	0.1638	18.0775	0.0051	0.164	32.1932	0.02532	0.4578	18.0783	0.03711	0.3903	10.5187
R_HOMCHL002910	0.01281	0.1695	13.2348	0.00805	0.1594	19.789	0.03401	0.2758	8.1111	0.00373	0.193	51.6659
R_HOMCHL002919	0.01887	0.1367	7.2424	0.0409	0.1138	2.7828	0.00272	0.1318	48.3735	0.00369	0.2078	56.3672
R_HOMCHL002926	0.06419	0.1179	1.836	0.08703	0.1212	1.3929	0.17735	0.3391	1.912
R_HOMCHL002936	0.00661	0.1465	22.17	0.05434	0.1491	2.7445	0.00547	0.2172	39.7087	0.00376	0.1908	50.8028
R_HOMCHL002942	0.0049	0.1207	24.642	0.00936	0.1718	18.3666	0.00451	0.1332	29.5463	0.00245	0.158	64.4703
R_HOMCHL002950	0.08674	0.1521	1.754	0.07764	0.2075	2.6723	0.04834	0.3169	6.5547	0.03627	0.3894	10.7384
R_HOMCHL002955	0.00819	0.1463	17.8659	0.00805	0.1729	21.4852	0.00598	0.2164	36.1703
R_HOMCHL002959	0.06863	0.1452	2.1154	0.08938	0.1489	1.6659	0.02505	0.153	6.1075	0.00426	0.2374	55.733
R_HOMCHL002961	0.07272	0.0753	1.0356	0.0401	0.0772	1.9261	0.00221	0.1131	51.275	0.00155	0.0789	50.9132
R_HOMCHL002962	0.00584	0.157	26.8651	0.04382	0.2222	5.0701	0.00796	0.4677	58.7419	0.00439	0.2521	57.3832
R_HOMCHL002964	0.01199	0.0989	8.2529	0.04661	0.094	2.0158	0.0046	0.1266	27.5101	0.0031	0.1385	44.6783
R_HOMCHL002969	0.03409	0.1389	4.0758	0.10364	0.1487	1.4351	0.00501	0.2052	40.9589	0.00457	0.2021	44.1698
R_HOMCHL002996	0.09581	0.1332	1.3906	0.03634	0.1223	3.3661	0.00912	0.1884	20.6623	0.01198	0.2002	16.7164
R_HOMCHL003003	0.00509	0.1287	25.2661	0.00451	0.1418	31.4696	0.0036	0.1518	42.1576	0.00413	0.1645	39.8691
R_HOMCHL003026	0.00712	0.1421	19.9474	0.00652	0.1663	25.5044	0.01118	0.175	15.6457	0.00918	0.6669	72.6475
R_HOMCHL003039	0.01102	0.1663	15.0873	0.01056	0.212	20.0794	0.0053	0.2076	39.1306	0.00467	0.2572	55.1169
R_HOMCHL003040	0.00712	0.1411	19.8287	0.00471	0.1423	30.2164	0.00449	0.1247	27.7864	0.0046	0.216	46.9542
R_HOMCHL003041	0.01725	0.1534	8.8925	0.06558	0.1431	2.1821	0.04856	0.1471	3.0288	0.00384	0.219	56.9673
R_HOMCHL003044	0.1153	0.1591	1.3794	0.08589	0.1611	1.876	0.02934	0.556	18.952
R_HOMCHL003053	0.12293	0.0958	0.779	0.03936	0.1046	2.6567	0.00328	0.1325	40.4297	0.00352	0.1636	46.5122
R_HOMCHL003060	0.00678	0.1772	26.1153	0.04255	0.1947	4.5766	0.00606	0.3992	65.8387	0.00536	0.2707	50.5314
R_HOMCHL003064	0.01706	0.0894	5.2394	0.03945	0.0842	2.134	0.01755	0.2045	11.6533	0.00192	0.088	45.9458
R_HOMCHL003067	0.15369	0.1522	0.9902	0.03528	0.1956	5.5451	0.00765	0.2265	29.5928
R_HOMCHL003068	0.00369	0.0984	26.6918	0.00461	0.1457	31.6327	0.00756	0.1522	20.1408	0.00206	0.1115	54.235
R_HOMCHL003070	0.08877	0.172	1.9374	0.13257	0.2641	1.9924	0.02155	0.5153	23.9129	0.0047	0.2785	59.1857
R_HOMCHL003082	0.00794	0.2003	25.2282	0.0073	0.2158	29.58	0.00525	0.228	43.3939	0.0081	0.4284	52.8896
R_HOMCHL003088	0.0714	0.1398	1.9578	0.05457	0.1442	2.6432	0.05708	0.178	3.1192	0.00493	0.2071	41.9857
R_HOMCHL003090	0.09876	0.113	1.1446	0.03266	0.1286	3.9358	0.02847	0.1528	5.3679	0.00402	0.1763	43.9094
R_HOMCHL003094	0.00819	0.1163	14.2028	0.06322	0.1353	2.1402	0.00731	0.2511	34.3311	0.02759	0.2289	8.2952
R_HOMCHL003105	0.14638	0.1675	1.1442	0.18539	0.2288	1.2344	0.00708	0.2368	33.4673	0.01613	0.2701	16.7435
R_HOMCHL003109	0.00899	0.1675	18.6293	0.04349	0.1382	3.1769	0.07405	0.2706	3.6548	0.00487	0.2425	49.8103
R_HOMCHL003114	0.02624	0.1747	6.6568	0.07321	0.1582	2.1604	0.01497	0.2362	15.7791	0.00744	0.3237	43.4901
R_HOMCHL003116	0.01215	0.1588	13.0677	0.05177	0.2395	4.6258	0.02117	0.2419	11.4235
R_HOMCHL003119	0.06946	0.1118	1.6099	0.0328	0.0952	2.9044	0.00364	0.1552	42.652	0.00253	0.1548	61.0665
R_HOMCHL003135	0.00649	0.1304	20.0793	0.03265	0.1422	4.3552	0.0055	0.2198	39.9447	0.08433	0.3177	3.7669
R_HOMCHL003144	0.01025	0.169	16.4835	0.00723	0.1535	21.2328	0.00603	0.2142	35.5068	0.00676	0.3678	54.4187
R_HOMCHL003147	0.08792	0.1606	1.8269	0.07114	0.159	2.2347	0.02376	0.2907	12.2331	0.00422	0.2734	64.7645
R_HOMCHL003148	0.00587	0.1433	24.4062	0.03995	0.1647	4.1213	0.04595	0.1696	3.6913	0.00386	0.2144	55.4971
R_HOMCHL003167	0.00292	0.0913	31.2882	0.00499	0.1048	21.0229	0.00456	0.1422	31.1686	0.00536	0.3054	56.915
R_HOMCHL003173	0.00548	0.1532	27.9574	0.00563	0.1535	27.2457	0.00349	0.1968	56.4518	0.00869	0.6149	70.7938
R_HOMCHL003175	0.03533	0.1231	3.4849	0.05677	0.105	1.8501	0.00396	0.1599	40.3306	0.00419	0.1322	31.5135
R_HOMCHL003177	0.00683	0.1548	22.681	0.00674	0.1837	27.2542	0.00527	0.3351	63.6072	0.00396	0.2369	59.8173
R_HOMCHL003180	0.00891	0.1872	21	0.00999	0.1704	17.0644	0.0056	0.176	31.4462	0.02509	0.3273	13.0449
R_HOMCHL003191	0.00977	0.1873	19.1748	0.10527	0.1636	1.5543	0.13723	0.259	1.8871	0.00461	0.2453	53.1782
R_HOMCHL003204	0.00547	0.1294	23.6767	0.04413	0.1579	3.5783	0.00837	0.2265	27.0446	0.01591	0.3004	18.876
R_HOMCHL003207	0.00833	0.1347	16.1614	0.05462	0.1253	2.2942	0.0097	0.3324	34.2507	0.00732	0.2512	34.3311
R_HOMCHL003211	0.00902	0.1618	17.9442	0.09893	0.1579	1.5966	0.00735	0.2806	38.2018	0.27304	0.4052	1.4838
R_HOMCHL003218	0.00694	0.147	21.1747	0.07342	0.1507	2.0522	0.00558	0.2463	44.162	0.00834	0.523	62.7068
R_HOMCHL003219	0.06458	0.2052	3.1777	0.06689	0.1811	2.7075	0.00727	0.3053	41.9778
R_HOMCHL003224	0.0229	0.1794	7.8328	0.0441	0.1626	3.6889
R_HOMCHL003247	0.00544	0.1233	22.6711	0.00477	0.1379	28.9314	0.01792	0.1083	6.0394	0.03487	0.1671	4.7912
R_HOMCHL003252	0.0099	0.162	16.3659	0.04358	0.1669	3.8301	0.00495	0.2041	41.2594	0.0066	0.2538	38.4614
R_HOMCHL003258	0.00468	0.0945	20.1865	0.00814	0.0826	10.1508	0.00447	0.1539	34.4576	0.00699	0.1343	19.201
R_HOMCHL003269	0.08221	0.1149	1.3981	0.05893	0.1397	2.3708	0.00685	0.2142	31.2583	0.05685	0.3735	6.5699
R_HOMCHL003270	0.15835	0.1364	0.8617	0.06991	0.1589	2.2727	0.01661	0.1992	11.9901	0.00312	0.1858	59.6299
R_HOMCHL003271	0.06496	0.0841	1.2944	0.01602	0.0731	4.5619	0.00419	0.159	37.9413	0.00158	0.0693	43.9534
R_HOMCHL003272	0.00761	0.1811	23.8092	0.00661	0.193	29.2179	0.00585	0.1937	33.1119
R_HOMCHL003276	0.04733	0.1499	3.1661	0.05799	0.1657	2.8566	0.00521	0.2209	42.4334	0.00583	0.3112	53.4171
R_HOMCHL003277	0.00883	0.1699	19.2521	0.04094	0.1607	3.9252	0.01522	0.5443	35.7689	0.16093	0.2819	1.7515
R_HOMCHL003306	0.00701	0.1644	23.4593	0.0059	0.1795	30.43	0.00644	0.316	49.0979
R_HOMCHL003307	0.00919	0.2018	21.9633	0.00962	0.2514	26.1357	0.01466	0.3582	24.4397
R_HOMCHL003327	0.00698	0.1246	17.851	0.00767	0.2222	28.9725	0.0582	0.2708	4.6518	0.00603	0.2374	39.3936
R_HOMCHL003329	0.01196	0.137	11.4459	0.00849	0.1566	18.4337	0.00473	0.2201	46.5866	0.00695	0.4537	65.3038
R_HOMCHL003344	0.00708	0.1325	18.7247	0.00371	0.1246	33.6124	0.00376	0.1246	33.6124	0.00522	0.2411	46.1763
R_HOMCHL003351	0.01491	0.1457	9.7743	0.00662	0.1691	25.5473	0.00428	0.1841	43.0122	0.00604	0.3279	54.3137
R_HOMCHL003352	0.17758	0.1213	0.6828	0.06947	0.1233	1.7742	0.01324	0.1664	12.5691	0.03162	0.1684	5.3267
R_HOMCHL003364	0.05422	0.1313	2.4222	0.11066	0.1419	1.2819	0.07286	0.2953	4.053	0.03815	0.2197	5.7595
R_HOMCHL003368	0.01224	0.2111	17.2433	0.07661	0.1573	2.0537	0.00621	0.221	35.5805	0.12607	0.4533	3.5956
R_HOMCHL003388	0.0087	0.1719	19.7582	0.06097	0.1859	3.0492	0.00652	0.2721	41.7561	0.17796	0.349	1.9612
R_HOMCHL003391	0.02026	0.1309	6.4593	0.04774	0.1619	3.3911	0.00294	0.1517	51.6081
R_HOMCHL003395	0.01238	0.2176	17.5805	0.00795	0.1963	24.6871	0.00574	0.2433	42.4139	0.00589	0.3327	56.4773
R_HOMCHL003428	0.00587	0.1286	21.9097	0.11637	0.1464	1.2583	0.0758	0.2285	3.0142	0.01223	0.2784	22.7643
R_HOMCHL003435	0.0078	0.1777	22.789	0.01192	0.2107	17.6703	0.13131	0.3103	2.3627
R_HOMCHL003440	0.00622	0.1481	23.827	0.05509	0.1404	2.5485	0.00445	0.1787	40.1575	0.03753	0.288	7.6731
R_HOMCHL003445	0.0059	0.153	25.9241	0.00475	0.1403	29.5225	0.00657	0.1756	26.7231
R_HOMCHL003470	0.01043	0.2001	19.1821	0.04065	0.2052	5.0476	0.00902	0.3397	37.6562
R_HOMCHL003480	0.00864	0.2146	24.8372	0.06008	0.2967	4.9387	0.08923	0.8096	9.0739	0.01103	0.7646	69.3326
R_HOMCHL003481	0.00784	0.1908	24.3324	0.00689	0.2069	30.0089	0.02341	0.4187	17.883	0.00674	0.4253	63.1287
R_HOMCHL003482	0.00621	0.1295	20.8336	0.00459	0.1589	34.6337	0.00425	0.2491	58.6072	0.02458	0.3489	14.1932
R_HOMCHL003494	0.00664	0.1278	19.2352	0.03192	0.1362	4.2673	0.00373	0.2067	55.3805	0.0084	0.2629	31.32
R_HOMCHL003501	0.0325	0.195	5.9994	0.00724	0.2171	30.003	0.04706	0.374	7.9463	0.00713	0.3599	50.5125
R_HOMCHL003503	0.00995	0.1694	17.0384	0.0073	0.1668	22.8591	0.06164	0.2567	4.1642	0.00904	0.4245	46.9802
R_HOMCHL003509	0.07401	0.1079	1.4584	0.04516	0.1113	2.465	0.03077	0.1035	3.364
R_HOMCHL003540	0.0067	0.1649	24.6043	0.00671	0.1649	24.6043	0.00622	0.3845	61.7946	0.0089	0.4228	47.4797
R_HOMCHL003549	0.00698	0.1651	23.6604	0.00627	0.1881	30.0135	0.06906	0.2316	3.3534	0.02765	0.3727	13.4773
R_HOMCHL003559	0.00661	0.1526	23.0945	0.00697	0.1615	23.1732	0.00495	0.2128	42.9705	0.0051	0.2127	41.6684
R_HOMCHL003561	0.00657	0.1441	21.9278	0.01311	0.2093	15.9618	0.00717	0.2806	39.1496	0.00658	0.1441	21.9278
R_HOMCHL003570	0.00692	0.1512	21.8396	0.01077	0.1922	17.843	0.0347	0.2665	7.6805	0.01688	0.3156	18.7028
R_HOMCHL003579	0.00847	0.1932	22.8187	0.00786	0.1975	25.1289	0.00501	0.2223	44.3947	0.06565	0.2453	3.737
R_HOMCHL003585	0.08756	0.1274	1.455	0.05594	0.1276	2.2803	0.03334	0.143	4.2891	0.00574	0.1798	31.3027
R_HOMCHL003602	0.00726	0.1498	20.626	0.03721	0.1363	3.664	0.0038	0.1458	38.3939	0.00729	0.1498	20.626
R_HOMCHL003613	0.00703	0.1355	19.2693	0.00654	0.1494	22.8396	0.01841	0.1883	10.2277	0.03809	0.1995	5.237
R_HOMCHL003631	0.00901	0.1801	19.9907	0.01297	0.1614	12.4409	0.08558	0.1867	2.1815	0.00603	0.4077	67.6268
R_HOMCHL003633	0.00813	0.2125	26.14	0.06006	0.1719	2.862	0.0054	0.2637	48.8635
R_HOMCHL003634	0.00482	0.1206	25.0205	0.01643	0.1517	9.2327	0.00272	0.1825	67.1725
R_HOMCHL003647	0.00829	0.1287	15.5261	0.00974	0.1262	12.9631	0.00602	0.1024	17.0111	0.00401	0.2364	58.9637
R_HOMCHL003651	0.22016	0.1627	0.7392	0.11307	0.2029	1.7949	0.03446	0.7351	21.3343	0.17454	0.4562	2.6139
R_HOMCHL003655	0.04354	0.0921	2.116	0.02843	0.0744	2.618	0.00993	0.3763	37.9009	0.00492	0.3166	64.3355
R_HOMCHL003658	0.10222	0.1487	1.4545	0.05072	0.2178	4.2938	0.00599	0.2646	44.1967	0.03618	0.164	4.5336
R_HOMCHL003669	0.05576	0.1861	3.3379	0.14959	0.2186	1.4616	0.00668	0.3222	48.2401	0.00394	0.1953	49.503
R_HOMCHL003691	0.00956	0.1852	19.3708	0.00763	0.1954	25.6207	0.00729	0.4226	57.9439	0.64875	0.3832	0.5907
R_HOMCHL003711	0.17596	0.1585	0.901	0.09133	0.1688	1.8478	0.01876	0.2886	15.3846	0.00458	0.2434	53.1922
R_HOMCHL003715	0.00759	0.1812	23.8909	0.01107	0.2325	21.0031	0.00728	0.3084	42.3614	0.00691	0.4429	64.0571
R_HOMCHL003749	0.00795	0.1734	21.8139	0.01192	0.2352	19.7278	0.00874	0.494	56.5518	0.07301	0.4283	5.8671
R_HOMCHL003760	0.02136	0.1447	6.7748	0.03121	0.1682	5.3906	0.02023	0.2375	11.7391	0.04024	0.0822	2.0424
R_HOMCHL003764	0.13414	0.1298	0.9676	0.23227	0.1708	0.7354	0.01062	0.1436	13.5261	0.13563	0.555	4.0922
R_HOMCHL003794	0.00819	0.1686	20.5984	0.0107	0.2248	21.0125	0.07515	0.213	2.8344	0.00685	0.4276	62.4528
R_HOMCHL003832	0.06846	0.1792	2.6176	0.10914	0.2402	2.2008	0.00716	0.3395	47.3975
R_HOMCHL003842	0.01038	0.1867	17.9931	0.06417	0.1703	2.6543	0.00533	0.2484	46.5871	0.00492	0.2569	52.2019
R_HOMCHL003855	0.00583	0.1626	27.8892	0.02774	0.1442	5.1983	0.005	0.2227	44.5883	0.00377	0.2763	73.2303
R_HOMCHL003857	0.00834	0.1825	21.8778	0.00786	0.1331	16.9378	0.00337	0.2267	67.2212	0.0039	0.2282	58.5396
R_HOMCHL003865	0.00722	0.1602	22.1973	0.09947	0.2176	2.1873	0.01309	0.2487	19.01	0.00645	0.2976	46.1592
R_HOMCHL003866	0.00895	0.1722	19.2435	0.05672	0.1911	3.3686	0.00578	0.2392	41.3519	0.00786	0.4485	57.0793
R_HOMCHL003875	0.04348	0.1636	3.762	0.05127	0.17	3.316	0.00646	0.4294	66.4108	0.00516	0.3702	71.8192
R_HOMCHL003886	0.00884	0.1974	22.343	0.00866	0.3149	36.3654	0.00653	0.3593	55.0139
R_HOMCHL003915	0.00813	0.1928	23.6955	0.00816	0.1928	23.6955	0.00558	0.3103	55.6402
R_HOMCHL003922	0.01528	0.1992	13.0347	0.00709	0.1694	23.8777	0.00727	0.4883	67.1981	0.12298	0.3495	2.8415
R_HOMCHL003936	0.00986	0.2005	20.3243	0.01003	0.2316	23.1043	0.0057	0.2376	41.7077
R_HOMCHL003954	0.00515	0.2049	39.8283	0.00312	0.1373	44.023	0.00437	0.3786	86.6348
R_HOMCHL003990	0.00814	0.1681	20.6433	0.01592	0.1981	12.4456	0.989			0.01242	0.8623	69.4458
R_HOMCHL004059	0.07113	0.1815	2.5516	0.05091	0.2268	4.4564	0.00726	0.2668	36.7289	0.0105	0.7789	74.1719
R_HOMCHL004087	0.00832	0.1735	20.8536	0.00869	0.1806	20.783	0.04703	0.2518	5.3537	0.03442	0.2103	6.1095
R_HOMCHL004099	0.00785	0.1533	19.5348	0.03326	0.1652	4.9654	0.00596	0.323	54.1674	0.00515	0.326	63.2754
R_HOMCHL004106	0.00971	0.189	19.4622	0.01179	0.2836	24.062	0.00807	0.2711	33.6041	0.00913	0.5683	62.2159
R_HOMCHL004117	0.00476	0.1273	26.7487	0.00559	0.1641	29.3631	0.01629	0.3614	22.1874	0.00485	0.1273	26.7487
R_HOMCHL004162	0.00852	0.194	22.7674	0.05574	0.2412	4.3267	0.80061			0.00299	0.1831	61.193
R_HOMCHL004179	0.00488	0.1544	31.6414	0.00423	0.1329	31.3938	0.0054	0.2595	48.0165
R_HOMCHL004204	0.006	0.1593	26.5583	0.00734	0.1364	18.5744	0.08266	0.5336	6.456
R_HOMCHL004213	0.05489	0.1322	2.4094	0.10657	0.3193	2.9961	0.05656	0.2287	4.0445	0.00717	0.493	68.749
R_HOMCHL004221	0.01655	0.0887	5.3571	0.01417	0.0974	6.8689
R_HOMCHL004259	0.00405	0.1269	31.3221	0.00887	0.262	29.5441	0.14441	0.5485	3.7981	0.00493	0.406	82.3654
R_HOMCHL004261	0.00806	0.1705	21.1685	0.00736	0.1784	24.2257	0.02375	0.275	11.5816
R_HOMCHL004329	0.0095	0.1994	20.9879	0.00605	0.1879	31.0412	0.18903	0.3168	1.6757	0.22611	0.3042	1.3453
R_HOMCHL004386	0.00983	0.1663	16.9219	0.08821	0.1591	1.8033	0.00713	0.4061	56.9622	0.06628	0.381	5.7489
R_HOMCHL004495	0.04796	0.1427	2.9761	0.0384	0.1677	4.3662	0.00462	0.3067	66.3869	0.01985	0.3094	15.5852
R_HOMCHL004497	0.01031	0.2079	20.1646	0.00806	0.2275	28.2141	0.0069	0.4167	60.4157	0.00854	0.5446	63.7961
R_HOMCHL004567	0.01017	0.2146	21.0913	0.00707	0.182	25.737	0.0097	0.6108	62.9684
R_HOMCHL004569	0.00983	0.1829	18.6104	0.16854	0.2118	1.2569	0.04263	0.2419	5.6753	0.0064	0.3821	59.745
R_HOMCHL004597	0.00728	0.184	25.2821	0.0851	0.1987	2.3345	0.00835	0.36	43.0895	0.00702	0.4535	64.6153
R_HOMCHL004687	0.01301	0.2021	15.5278	0.00779	0.1602	20.5616	0.00984	0.2643	26.8659
R_HOMCHL004722	0.00694	0.1803	25.9704	0.00491	0.1075	21.8775	0.00661	0.2487	37.6236
R_HOMCHL004775	0.07297	0.1795	2.4599	0.00454	0.2166	47.7398
R_HOMCHL004912	0.05431	0.1474	2.7147	0.04428	0.1466	3.3112	0.95359			0.07223	0.5398	7.4734
R_HOMCHL004928	0.01179	0.1754	14.8753	0.02529	0.1214	4.7988	0.00581	0.2415	41.5404
R_HOMCHL004963	0.11993	0.133	1.109	0.09374	0.1497	1.5965	0.00657	0.1954	29.7638	0.02126	0.2386	11.2228
R_HOMCHL005051	0.00512	0.1456	28.453	0.00281	0.1204	42.8987	0.00476	0.1712	35.9397
R_HOMCHL005087	0.00633	0.1491	23.5433	0.00676	0.2381	35.2113	0.03101	0.4124	13.3016	0.00766	0.4694	61.247
R_HOMCHL005095	0.0051	0.1325	25.9811	0.06922	0.1366	1.9729	0.01224	0.2306	18.8475	0.00337	0.2592	76.867
R_HOMCHL005226	0.00795	0.1565	19.6992	0.04047	0.0779	1.9253	0.00921	0.1715	18.6123
Average	0.0381677	0.12982	11.7849	0.0451153	0.139171	8.47057	0.0254395	0.208364	27.4003	0.0242548	0.231181	33.4494
Median	0.01256	0.1298	9.8058	0.0431	0.1376	2.755	0.00685	0.1884	29.5463	0.00604	0.2019	38.7936
Four genes failed to produce PAML analysis output.
Blank spaces for certain genes indicate absences of representatives for those categories
