# Supplementary material for: Genome-wide patterns of selection–drift variation strongly associate with organismal traits across the green plant lineage
Source: Genome Res. 2024 Aug;34(8):1130–9. doi: 10.1101/gr.279002.124 (PMC11444171; doi:10.1101/gr.279002.124)
Supplement: Supplement 16 [file Supplemental_Table_S4.xlsx]

## Sheet: Uni_Multi_01_24
Supplemental Table S4: PAML outputs for life cycle based models[M2]. Lists the dN, dS and dN/dS values of low copy genes of haploid and haploid-diploid algae.
	Haploid			Haploid-Diploid
Gene	dN/dS	dN	dS	dN/dS	dN	dS
UM_HOMCHL000439	0.06444	0.0377	0.5845	0.02612	0.1965	7.5219
UM_HOMCHL000496	0.112	0.0815	0.7275	0.04791	0.0687	1.4337
UM_HOMCHL000545	0.08133	0.1383	1.7004	0.0533	0.1821	3.4172
UM_HOMCHL000664	0.09903	0.0537	0.5421	0.04867	0.0722	1.4842
UM_HOMCHL000732	0.00766	0.053	6.9157	0.00193	0.086	44.4695
UM_HOMCHL000737	0.05411	0.0669	1.237	0.058	0.0608	1.0481
UM_HOMCHL000773	0.05708	0.0988	1.7311	0.00286	0.1137	39.7107
UM_HOMCHL000781	0.04882	0.0312	0.6387	0.01869	0.0311	1.6649
UM_HOMCHL000789	0.06501	0.1016	1.5633	0.08414	0.2161	2.5687
UM_HOMCHL000807	0.08788	0.1264	1.439	0.02913	0.1523	5.2277
UM_HOMCHL000817	0.01551	0.0561	3.6173	0.01431	0.0862	6.0237
UM_HOMCHL000826	0.00733	0.1329	18.1244	0.07846	0.1378	1.7562
UM_HOMCHL000844	0.03868	0.0366	0.946	0.01826	0.0328	1.7955
UM_HOMCHL000878	0.00469	0.0975	20.7748	0.05008	0.1374	2.7429
UM_HOMCHL000897	0.06103	0.0903	1.4793	0.00613	0.2881	47.011
UM_HOMCHL000921	0.01593	0.0497	3.1211	0.01391	0.0552	3.9693
UM_HOMCHL000939	0.0075	0.1371	18.2763	0.04308	0.1764	4.0946
UM_HOMCHL000944	0.07134	0.0534	0.7488	0.03764	0.0744	1.9755
UM_HOMCHL000952	0.03939	0.0549	1.3928	0.01842	0.0779	4.2302
UM_HOMCHL000959	0.01187	0.0907	7.6408	0.03491	0.0894	2.5608
UM_HOMCHL000962	0.04553	0.0368	0.8093	0.00949	0.0459	4.8446
UM_HOMCHL000964	0.02638	0.0675	2.5592	0.02987	0.0561	1.8783
UM_HOMCHL000975	0.1649	0.0957	0.5805	0.04214	0.1046	2.4815
UM_HOMCHL000977	0.04129	0.0439	1.0642	0.02511	0.0335	1.3358
UM_HOMCHL000979	0.04944	0.0591	1.1944	0.02659	0.0624	2.3479
UM_HOMCHL000982	0.04996	0.0845	1.6913	0.02447	0.0916	3.742
UM_HOMCHL000998	0.04034	0.0367	0.9096	0.02155	0.0499	2.315
UM_HOMCHL001007	0.04792	0.0587	1.2245	0.00867	0.0583	6.7272
UM_HOMCHL001008	0.08834	0.0975	1.1033	0.04651	0.0994	2.1364
UM_HOMCHL001026	0.05537	0.0734	1.3251	0.05599	0.0896	1.5998
UM_HOMCHL001040	0.07303	0.105	1.4376	0.0538	0.1418	2.6353
UM_HOMCHL001069	0.03135	0.0697	2.224	0.07603	0.11	1.4461
UM_HOMCHL001123	0.03394	0.0455	1.341	0.01527	0.0461	3.0156
UM_HOMCHL001141	0.06859	0.0822	1.1979	0.02117	0.0989	4.6721
UM_HOMCHL001147	0.05485	0.0735	1.3406	0.00259	0.072	27.8105
UM_HOMCHL001154	0.08096	0.1064	1.3138	0.04126	0.0886	2.1486
UM_HOMCHL001160	0.07694	0.0771	1.0018	0.00177	0.0637	36.0062
UM_HOMCHL001161	0.08074	0.1007	1.2474	0.00444	0.1342	30.2293
UM_HOMCHL001169	0.00519	0.1219	23.4602	0.06443	0.2292	3.5567
UM_HOMCHL001170	0.13375	0.092	0.6878	0.00417	0.0995	23.8591
UM_HOMCHL001173	0.05179	0.1009	1.9474	0.06267	0.1191	1.9006
UM_HOMCHL001175	0.04751	0.2478	5.2154	0.0417	0.1078	2.5845
UM_HOMCHL001177	0.08553	0.1057	1.2364	0.04893	0.177	3.6185
UM_HOMCHL001182	0.04661	0.1128	2.4201	0.03539	0.0898	2.5369
UM_HOMCHL001203	0.0212	0.1403	6.615	0.03314	0.0783	2.3629
UM_HOMCHL001205	0.03196	0.0306	0.958	0.01733	0.0395	2.28
UM_HOMCHL001216	0.02097	0.0553	2.6383	0.00207	0.0803	38.7211
UM_HOMCHL001217	0.03396	0.0662	1.9486	0.02688	0.1034	3.8461
UM_HOMCHL001230	0.04136	0.0766	1.8533	0.01214	0.1033	8.5157
UM_HOMCHL001240	0.09117	0.1749	1.9185	0.00524	0.1837	35.068
UM_HOMCHL001242	0.04415	0.0552	1.2509	0.02356	0.0721	3.0585
UM_HOMCHL001248	0.00999	0.1387	13.886	0.14058	0.1614	1.1478
UM_HOMCHL001253	0.07311	0.1005	1.3744	0.04878	0.1087	2.2288
UM_HOMCHL001258	0.00458	0.1231	26.8712	0.07978	0.1755	2.1995
UM_HOMCHL001261	0.01013	0.0998	9.8471	0.09605	0.1061	1.1043
UM_HOMCHL001265	0.0049	0.1061	21.651	0.06609	0.1183	1.7902
UM_HOMCHL001273	0.09048	0.061	0.6735	0.00322	0.0908	28.1844
UM_HOMCHL001274	0.04684	0.0481	1.0261	0.02684	0.057	2.1225
UM_HOMCHL001278	0.02584	0.0378	1.4635	0.03374	0.0396	1.1749
UM_HOMCHL001285	0.01875	0.1061	5.6608	0.07483	0.1445	1.9316
UM_HOMCHL001287	0.02891	0.1248	4.3167	0.02532	0.081	3.1973
UM_HOMCHL001292	0.00558	0.0969	17.3568	0.00291	0.1095	37.692
UM_HOMCHL001293	0.00417	0.1229	29.475	0.06933	0.1584	2.2845
UM_HOMCHL001305	0.00539	0.1592	29.5478	0.06977	0.1784	2.5567
UM_HOMCHL001327	0.07772	0.0833	1.0722	0.08205	0.1204	1.467
UM_HOMCHL001339	0.0154	0.115	7.4692	0.0479	0.1179	2.4613
UM_HOMCHL001344	0.03802	0.0991	2.6066	0.03422	0.1148	3.3559
UM_HOMCHL001356	0.00997	0.1248	12.5258	0.0793	0.126	1.5894
UM_HOMCHL001359	0.02492	0.0727	2.9176	0.01539	0.0837	5.4411
UM_HOMCHL001361	0.00563	0.1729	30.6883	0.03026	0.1503	4.9695
UM_HOMCHL001362	0.0035	0.0743	21.2435	0.05798	0.0838	1.4456
UM_HOMCHL001367	0.01765	0.083	4.7001	0.0044	0.0702	15.9522
UM_HOMCHL001369	0.01577	0.0811	5.1444	0.02372	0.0956	4.0292
UM_HOMCHL001370	0.03945	0.1132	2.8709	0.07351	0.1151	1.5656
UM_HOMCHL001372	0.0038	0.093	24.4551	0.00326	0.1245	38.1603
UM_HOMCHL001374	0.00404	0.1097	27.136	0.07298	0.1258	1.7243
UM_HOMCHL001387	0.04677	0.0921	1.9686	0.03078	0.1066	3.4639
UM_HOMCHL001395	0.13249	0.1153	0.8702	0.07775	0.1629	2.0957
UM_HOMCHL001409	0.05466	0.077	1.4089	0.07479	0.0928	1.2409
UM_HOMCHL001412	0.09685	0.1076	1.1111	0.08888	0.1512	1.7015
UM_HOMCHL001414	0.05558	0.085	1.5284	0.01942	0.0977	5.0285
UM_HOMCHL001415	0.05529	0.1043	1.8859	0.0468	0.1471	3.144
UM_HOMCHL001427	0.00491	0.1349	27.4768	0.00787	0.1987	25.2325
UM_HOMCHL001433	0.09953	0.15	1.5073	0.0751	0.1606	2.138
UM_HOMCHL001434	0.06481	0.0967	1.4928	0.03959	0.2392	6.042
UM_HOMCHL001438	0.02469	0.0893	3.6164	0.02558	0.0857	3.3485
UM_HOMCHL001443	0.03931	0.0635	1.6146	0.0279	0.0797	2.8555
UM_HOMCHL001445	0.06945	0.0969	1.3953	0.05247	0.1401	2.6707
UM_HOMCHL001446	0.05764	0.1231	2.1358	0.00536	0.2131	39.7792
UM_HOMCHL001451	0.06978	0.0811	1.1624	0.0323	0.0887	2.7472
UM_HOMCHL001460	0.00489	0.1041	21.2795	0.04867	0.1588	3.2634
UM_HOMCHL001467	0.01132	0.0805	7.1145	0.07938	0.1034	1.3022
UM_HOMCHL001471	0.0962	0.1205	1.2527	0.10618	0.1777	1.6741
UM_HOMCHL001474	0.00464	0.0823	17.7508	0.0802	0.1532	1.9103
UM_HOMCHL001481	0.00584	0.1328	22.7294	0.0371	0.1855	5.0001
UM_HOMCHL001484	0.04311	0.0723	1.6771	0.03434	0.0966	2.814
UM_HOMCHL001498	0.01602	0.0836	5.2188	0.03766	0.1412	3.7485
UM_HOMCHL001505	0.09285	0.0747	0.8043	0.02491	0.1055	4.2355
UM_HOMCHL001506	0.07941	0.0647	0.815	0.06248	0.1059	1.6947
UM_HOMCHL001512	0.02511	0.0751	2.9907	0.02727	0.0732	2.6848
UM_HOMCHL001517	0.14333	0.1349	0.9409	0.0379	0.1495	3.9457
UM_HOMCHL001526	0.0566	0.1012	1.7879	0.03786	0.1216	3.2125
UM_HOMCHL001536	0.02564	0.0744	2.9003	0.04865	0.0785	1.6138
UM_HOMCHL001539	0.03744	0.0814	2.1745	0.00883	0.1276	14.451
UM_HOMCHL001550	0.06358	0.0607	0.954	0.04002	0.0943	2.3568
UM_HOMCHL001552	0.10133	0.1323	1.3052	0.07825	0.2104	2.6889
UM_HOMCHL001556	0.13821	0.1448	1.0474	0.06272	0.1681	2.6802
UM_HOMCHL001560	0.11744	0.1747	1.4872	0.00419	0.1219	29.1241
UM_HOMCHL001563	0.11402	0.1344	1.1786	0.11046	0.1477	1.3368
UM_HOMCHL001574	0.01591	0.1066	6.7032	0.04584	0.1136	2.4772
UM_HOMCHL001575	0.03609	0.0899	2.4909	0.02199	0.122	5.5484
UM_HOMCHL001577	0.00448	0.1169	26.1024	0.01651	0.1721	10.4272
UM_HOMCHL001591	0.04306	0.0787	1.8285	0.07172	0.1088	1.5165
UM_HOMCHL001601	0.0297	0.0678	2.2837	0.02425	0.1204	4.9632
UM_HOMCHL001610	0.07596	0.088	1.1583	0.07428	0.1067	1.436
UM_HOMCHL001616	0.00439	0.1108	25.2359	0.03049	0.1276	4.1857
UM_HOMCHL001619	0.0866	0.1439	1.6614	0.06762	0.1927	2.8497
UM_HOMCHL001622	0.00547	0.1142	20.8778	0.14811	0.1143	0.772
UM_HOMCHL001625	0.00457	0.1106	24.2212	0.04974	0.1908	3.8353
UM_HOMCHL001629	0.12116	0.1084	0.8949	0.09969	0.1199	1.2033
UM_HOMCHL001630	0.05204	0.0522	1.0025	0.02983	0.0613	2.0564
UM_HOMCHL001633	0.04999	0.0686	1.3727	0.02786	0.2539	9.1135
UM_HOMCHL001637	0.03798	0.056	1.4755	0.01902	0.1278	6.72
UM_HOMCHL001640	0.05666	0.1171	2.0665	0.0574	0.138	2.4045
UM_HOMCHL001643	0.03277	0.0788	2.4054	0.01478	0.1333	9.0177
UM_HOMCHL001652	0.00449	0.1113	24.7982	0.00843	0.1166	13.8273
UM_HOMCHL001655	0.1185	0.1794	1.5138	0.04888	0.191	3.9078
UM_HOMCHL001662	0.00454	0.1117	24.6409	0.07521	0.1944	2.5847
UM_HOMCHL001664	0.06871	0.1563	2.2751	0.0473	0.0991	2.0958
UM_HOMCHL001668	0.0042	0.113	26.9437	0.06607	0.1284	1.9438
UM_HOMCHL001671	0.06178	0.1516	2.4538	0.04829	0.1544	3.1984
UM_HOMCHL001672	0.06236	0.1418	2.2735	0.03829	0.2285	5.9668
UM_HOMCHL001674	0.0108	0.138	12.7837	0.00457	0.1633	35.7406
UM_HOMCHL001678	0.01256	0.1603	12.7558	0.0045	0.1691	37.6026
UM_HOMCHL001687	0.01585	0.0551	3.4736	0.00583	0.1091	18.7062
UM_HOMCHL001689	0.0614	0.0905	1.4739	0.04971	0.0908	1.8268
UM_HOMCHL001690	0.10876	0.112	1.0298	0.03609	0.1147	3.1796
UM_HOMCHL001706	0.04096	0.0685	1.6722	0.02727	0.0712	2.6128
UM_HOMCHL001716	0.00633	0.1517	23.9755	0.00646	0.1853	28.6997
UM_HOMCHL001722	0.03297	0.0625	1.8968	0.039	0.102	2.6147
UM_HOMCHL001725	0.04525	0.0691	1.5267	0.05121	0.1111	2.1694
UM_HOMCHL001726	0.00452	0.1234	27.3116	0.08055	0.1468	1.8229
UM_HOMCHL001727	0.09074	0.1027	1.1324	0.00554	0.1411	25.445
UM_HOMCHL001734	0.02905	0.0734	2.5259	0.03083	0.0988	3.2054
UM_HOMCHL001735	0.03088	0.0889	2.879	0.00441	0.1	22.6762
UM_HOMCHL001742	0.01306	0.1091	8.3523	0.00365	0.0801	21.9085
UM_HOMCHL001751	0.07267	0.0527	0.7255	0.02598	0.0665	2.5593
UM_HOMCHL001754	0.05461	0.105	1.9229	0.00474	0.1424	30.0623
UM_HOMCHL001758	0.07739	0.1473	1.9027	0.10902	0.1736	1.5926
UM_HOMCHL001762	0.00349	0.0941	26.948	0.00483	0.1368	28.3254
UM_HOMCHL001770	0.01335	0.0875	6.553	0.01104	0.1159	10.4975
UM_HOMCHL001781	0.01754	0.1104	6.2932	0.05969	0.0845	1.415
UM_HOMCHL001782	0.00654	0.0989	15.113	0.02635	0.1026	3.895
UM_HOMCHL001790	0.05887	0.0884	1.501	0.00473	0.1167	24.6599
UM_HOMCHL001791	0.08649	0.1457	1.6847	0.07966	0.2094	2.6293
UM_HOMCHL001793	0.00469	0.1039	22.1635	0.12042	0.1382	1.1473
UM_HOMCHL001805	0.06583	0.0907	1.3778	0.07072	0.0941	1.3312
UM_HOMCHL001808	0.07302	0.0641	0.8785	0.06569	0.081	1.2335
UM_HOMCHL001813	0.00681	0.0565	8.2917	0.02307	0.0866	3.7535
UM_HOMCHL001817	0.00233	0.0743	31.8166	0.07356	0.1029	1.3987
UM_HOMCHL001819	0.07731	0.0941	1.217	0.08444	0.1118	1.3244
UM_HOMCHL001824	0.00438	0.1075	24.5731	0.00631	0.1294	20.5018
UM_HOMCHL001829	0.01486	0.0619	4.166	0.02896	0.0748	2.5827
UM_HOMCHL001836	0.03593	0.0941	2.6183	0.00416	0.1203	28.9073
UM_HOMCHL001843	0.05185	0.0947	1.8276	0.05796	0.1363	2.3512
UM_HOMCHL001844	0.00917	0.1421	15.4836	0.08749	0.1583	1.8099
UM_HOMCHL001855	0.07333	0.1079	1.471	0.00704	0.1473	20.9342
UM_HOMCHL001861	0.04421	0.0958	2.1678	0.02062	0.1032	5.0033
UM_HOMCHL001863	0.05604	0.0961	1.7156	0.07745	0.1579	2.0384
UM_HOMCHL001865	0.10257	0.1335	1.3013	0.04775	0.1214	2.5429
UM_HOMCHL001867	0.0514	0.0813	1.5813	0.02123	0.0834	3.9289
UM_HOMCHL001875	0.07454	0.0758	1.0166	0.00623	0.1405	22.5315
UM_HOMCHL001877	0.05519	0.1514	2.7428	0.08186	0.1537	1.8783
UM_HOMCHL001882	0.03948	0.1022	2.589	0.06872	0.1263	1.8374
UM_HOMCHL001884	0.00653	0.0742	11.3577	0.06875	0.1222	1.7778
UM_HOMCHL001885	0.06037	0.1234	2.0444	0.05942	0.1577	2.6534
UM_HOMCHL001890	0.06549	0.1121	1.7122	0.07544	0.1202	1.5939
UM_HOMCHL001893	0.06063	0.0868	1.4321	0.04068	0.1037	2.5479
UM_HOMCHL001895	0.00792	0.1848	23.3432	0.08253	0.1918	2.3234
UM_HOMCHL001896	0.05372	0.1225	2.2812	0.03611	0.1352	3.7446
UM_HOMCHL001897	0.01004	0.0758	7.5483	0.00363	0.0825	22.7352
UM_HOMCHL001899	0.01475	0.2557	17.3341	0.12317	0.1841	1.4952
UM_HOMCHL001905	0.00553	0.1339	24.2017	0.08814	0.1642	1.8635
UM_HOMCHL001907	0.06885	0.0645	0.9375	0.03655	0.0678	1.8543
UM_HOMCHL001909	0.02554	0.0882	3.4518	0.05017	0.1333	2.6564
UM_HOMCHL001912	0.04056	0.0603	1.4868	0.0217	0.0783	3.6057
UM_HOMCHL001914	0.05685	0.1259	2.2146	0.06461	0.1327	2.0546
UM_HOMCHL001915	0.08906	0.1165	1.3083	0.04771	0.1573	3.2965
UM_HOMCHL001917	0.03877	0.0988	2.5474	0.00379	0.1378	36.3612
UM_HOMCHL001946	0.04083	0.159	3.8945	0.12525	0.2003	1.5993
UM_HOMCHL001948	0.03815	0.0297	0.7775	0.02587	0.0339	1.3102
UM_HOMCHL001955	0.04211	0.062	1.4718	0.03935	0.0797	2.0252
UM_HOMCHL001956	0.0724	0.1092	1.5085	0.03624	0.1296	3.5764
UM_HOMCHL001959	0.10397	0.0955	0.9186	0.03383	0.231	6.8282
UM_HOMCHL001965	0.00548	0.1117	20.3956	0.00633	0.1501	23.7186
UM_HOMCHL001972	0.08814	0.1082	1.2272	0.05174	0.1561	3.0174
UM_HOMCHL001981	0.00981	0.1433	14.6094	0.07017	0.1789	2.5497
UM_HOMCHL001985	0.06414	0.0861	1.3425	0.09716	0.1042	1.0724
UM_HOMCHL001988	0.07099	0.1203	1.6944	0.00594	0.1487	25.0392
UM_HOMCHL001995	0.03648	0.0946	2.5938	0.04652	0.1136	2.4413
UM_HOMCHL002007	0.09626	0.0924	0.9601	0.06458	0.1083	1.6771
UM_HOMCHL002011	0.02914	0.0788	2.7034	0.04135	0.1164	2.8141
UM_HOMCHL002021	0.00617	0.1663	26.9423	0.11585	0.1327	1.1451
UM_HOMCHL002024	0.05425	0.0718	1.3228	0.05482	0.1245	2.2704
UM_HOMCHL002025	0.09369	0.0851	0.908	0.00299	0.1103	36.9104
UM_HOMCHL002033	0.00823	0.1683	20.4486	0.03283	0.3707	11.2924
UM_HOMCHL002040	0.13681	0.1971	1.4407	0.15082	0.1803	1.1953
UM_HOMCHL002041	0.04403	0.0813	1.8457	0.00237	0.0789	33.2377
UM_HOMCHL002048	0.00661	0.1334	20.1898	0.00413	0.1274	30.8431
UM_HOMCHL002051	0.05262	0.1559	2.9621	0.08819	0.1578	1.7889
UM_HOMCHL002053	0.00561	0.1497	26.6638	0.00422	0.1607	38.0503
UM_HOMCHL002062	0.05895	0.082	1.3902	0.02894	0.0743	2.5656
UM_HOMCHL002074	0.07165	0.1188	1.6576	0.05426	0.141	2.5979
UM_HOMCHL002097	0.00306	0.0809	26.4259	0.0341	0.1189	3.4884
UM_HOMCHL002099	0.10996	0.1732	1.5751	0.06932	0.1825	2.6325
UM_HOMCHL002103	0.0564	0.1001	1.7754	0.05395	0.0879	1.6292
UM_HOMCHL002112	0.00527	0.1224	23.2176	0.03223	0.1635	5.0732
UM_HOMCHL002113	0.06474	0.1222	1.8874	0.08314	0.1465	1.7617
UM_HOMCHL002115	0.06377	0.1311	2.055	0.0239	0.1563	6.5384
UM_HOMCHL002129	0.08283	0.1014	1.2245	0.01895	0.0818	4.3183
UM_HOMCHL002131	0.04798	0.0799	1.6651	0.02958	0.0783	2.6483
UM_HOMCHL002132	0.10301	0.1113	1.0803	0.08712	0.1712	1.9654
UM_HOMCHL002134	0.07862	0.1155	1.469	0.05592	0.1489	2.6629
UM_HOMCHL002148	0.01273	0.0563	4.4252	0.0197	0.0267	1.3573
UM_HOMCHL002150	0.00486	0.1268	26.0641	0.00848	0.1413	16.6595
UM_HOMCHL002174	0.00805	0.0408	5.0646	0.01451	0.0567	3.9095
UM_HOMCHL002176	0.04437	0.0916	2.0635	0.04537	0.0991	2.1855
UM_HOMCHL002181	0.08172	0.1056	1.2925	0.0499	0.1255	2.5145
UM_HOMCHL002186	0.00459	0.1137	24.7876	0.09163	0.1851	2.0198
UM_HOMCHL002189	0.02497	0.0801	3.2077	0.0146	0.0713	4.8877
UM_HOMCHL002190	0.01401	0.1054	7.5183	0.04299	0.088	2.0456
UM_HOMCHL002193	0.01124	0.1607	14.3017	0.05716	0.1486	2.6007
UM_HOMCHL002195	0.1308	0.1381	1.0555	0.0792	0.1539	1.9428
UM_HOMCHL002199	0.04614	0.1045	2.2643	0.04402	0.0872	1.9801
UM_HOMCHL002200	0.04579	0.1144	2.4991	0.09063	0.1162	1.2818
UM_HOMCHL002201	0.04742	0.0915	1.9288	0.05939	0.1289	2.1709
UM_HOMCHL002204	0.01503	0.0489	3.2506	0.0033	0.0945	28.6063
UM_HOMCHL002217	0.06472	0.1401	2.1645	0.06489	0.1385	2.1351
UM_HOMCHL002226	0.04494	0.1173	2.6112	0.06012	0.2799	4.6545
UM_HOMCHL002228	0.03914	0.1223	3.1242	0.02351	0.1205	5.1272
UM_HOMCHL002232	0.04056	0.0644	1.5869	0.02683	0.0656	2.4459
UM_HOMCHL002236	0.06205	0.1417	2.283	0.02384	0.1305	5.4726
UM_HOMCHL002237	0.15044	0.1513	1.0058	0.09013	0.2548	2.8271
UM_HOMCHL002240	0.00721	0.1625	22.541	0.03888	0.1691	4.3502
UM_HOMCHL002248	0.00416	0.1116	26.8451	0.00639	0.1653	25.8534
UM_HOMCHL002254	0.02532	0.068	2.687	0.04461	0.063	1.4116
UM_HOMCHL002257	0.00353	0.0831	23.5208	0.0293	0.1092	3.7269
UM_HOMCHL002260	0.02458	0.0724	2.9459	0.02958	0.0827	2.7957
UM_HOMCHL002261	0.02354	0.0541	2.2961	0.00958	0.0847	8.8412
UM_HOMCHL002263	0.0433	0.0664	1.5335	0.00889	0.0667	7.5029
UM_HOMCHL002264	0.00745	0.1589	21.3372	0.00992	0.1768	17.8218
UM_HOMCHL002267	0.0122	0.091	7.4563	0.00375	0.1079	28.7618
UM_HOMCHL002271	0.02037	0.204	10.0124	0.01122	0.2127	18.9579
UM_HOMCHL002272	0.0678	0.0916	1.3517	0.04391	0.3122	7.1102
UM_HOMCHL002277	0.05863	0.0982	1.6753	0.10204	0.1197	1.1729
UM_HOMCHL002278	0.09702	0.1509	1.5551	0.00315	0.1471	46.7454
UM_HOMCHL002280	0.07012	0.1315	1.8758	0.03834	0.1428	3.723
UM_HOMCHL002286	0.03298	0.0686	2.0795	0.02832	0.0779	2.75
UM_HOMCHL002288	0.06605	0.0683	1.0339	0.03737	0.0812	2.1729
UM_HOMCHL002293	0.10745	0.1067	0.993	0.00504	0.147	29.1484
UM_HOMCHL002303	0.04959	0.1031	2.0779	0.03142	0.1435	4.5655
UM_HOMCHL002305	0.00907	0.1495	16.4832	0.00669	0.154	23.0224
UM_HOMCHL002306	0.00246	0.0722	29.3282	0.02179	0.0748	3.431
UM_HOMCHL002310	0.00405	0.1228	30.3357	0.04993	0.1397	2.7987
UM_HOMCHL002313	0.00336	0.1044	31.104	0.00595	0.144	24.2136
UM_HOMCHL002317	0.05374	0.0975	1.8143	0.00299	0.1065	35.6483
UM_HOMCHL002324	0.02167	0.0889	4.1041	0.10165	0.0936	0.9203
UM_HOMCHL002327	0.00404	0.114	28.2466	0.00509	0.1581	31.0399
UM_HOMCHL002338	0.06725	0.1245	1.8517	0.03054	0.1381	4.5235
UM_HOMCHL002340	0.11089	0.1405	1.2671	0.04012	0.158	3.9387
UM_HOMCHL002347	0.03198	0.1043	3.2611	0.04077	0.1031	2.528
UM_HOMCHL002361	0.10502	0.1107	1.0538	0.00492	0.1717	34.913
UM_HOMCHL002363	0.00413	0.0815	19.7359	0.04042	0.1499	3.7093
UM_HOMCHL002365	0.00632	0.123	19.4443	0.09375	0.1371	1.4624
UM_HOMCHL002366	0.02994	0.0696	2.3242	0.05739	0.0957	1.6673
UM_HOMCHL002380	0.00533	0.1586	29.7671	0.00451	0.162	35.963
UM_HOMCHL002381	0.01862	0.0857	4.6045	0.00644	0.0861	13.3585
UM_HOMCHL002387	0.19426	0.1596	0.8216	0.04482	0.158	3.5263
UM_HOMCHL002400	0.11805	0.2454	2.0791	0.00609	0.1616	26.521
UM_HOMCHL002401	0.0041	0.1284	31.3137	0.08453	0.1638	1.9374
UM_HOMCHL002412	0.00469	0.1504	32.0478	0.11596	0.1906	1.644
UM_HOMCHL002414	0.03044	0.0721	2.3673	0.03415	0.1124	3.2922
UM_HOMCHL002417	0.00425	0.1226	28.8274	0.01137	0.1333	11.7248
UM_HOMCHL002424	0.09905	0.1366	1.379	0.00468	0.1562	33.3924
UM_HOMCHL002425	0.01952	0.1319	6.7567	0.00831	0.1544	18.5941
UM_HOMCHL002428	0.00208	0.0579	27.7867	0.04307	0.0544	1.2635
UM_HOMCHL002432	0.0077	0.1894	24.6097	0.15512	0.3875	2.498
UM_HOMCHL002433	0.02556	0.0903	3.5312	0.00415	0.0961	23.1532
UM_HOMCHL002436	0.06936	0.134	1.9317	0.04519	0.1495	3.3081
UM_HOMCHL002441	0.00391	0.1046	26.772	0.00582	0.1504	25.829
UM_HOMCHL002471	0.00394	0.1119	28.4134	0.00495	0.1474	29.7539
UM_HOMCHL002482	0.00889	0.1711	19.2439	0.06907	0.1568	2.2697
UM_HOMCHL002488	0.05649	0.1226	2.1705	0.00368	0.133	36.1757
UM_HOMCHL002489	0.02853	0.0765	2.6834	0.04579	0.0708	1.5458
UM_HOMCHL002492	0.09401	0.1083	1.1523	0.00323	0.1124	34.8324
UM_HOMCHL002493	0.05494	0.0875	1.5921	0.00198	0.1174	59.1946
UM_HOMCHL002496	0.04088	0.1018	2.4895	0.03673	0.111	3.0232
UM_HOMCHL002497	0.00639	0.1213	18.9631	0.05815	0.1646	2.8299
UM_HOMCHL002498	0.02035	0.0803	3.9459	0.02215	0.0862	3.8927
UM_HOMCHL002512	0.00464	0.101	21.7965	0.08962	0.136	1.5177
UM_HOMCHL002517	0.04687	0.101	2.1552	0.03485	0.1144	3.2837
UM_HOMCHL002521	0.00421	0.1082	25.6637	0.00596	0.1358	22.7872
UM_HOMCHL002522	0.04782	0.1711	3.5792	0.03026	0.1302	4.3035
UM_HOMCHL002527	0.00499	0.13	26.0821	0.00599	0.1354	22.6221
UM_HOMCHL002528	0.02608	0.1182	4.5311	0.02509	0.1514	6.0361
UM_HOMCHL002532	0.06123	0.0889	1.4528	0.07412	0.0953	1.2853
UM_HOMCHL002536	0.01161	0.116	9.99	0.00444	0.1229	27.6701
UM_HOMCHL002546	0.1168	0.1177	1.0077	0.01319	0.1622	12.296
UM_HOMCHL002547	0.00807	0.1724	21.3585	0.02121	0.2015	9.5002
UM_HOMCHL002548	0.0111	0.0648	5.8403	0.02522	0.0576	2.2843
UM_HOMCHL002552	0.0068	0.1071	15.7434	0.01526	0.0957	6.2744
UM_HOMCHL002553	0.0741	0.1215	1.64	0.05146	0.1618	3.1439
UM_HOMCHL002554	0.00348	0.0952	27.3764	0.00309	0.1319	42.738
UM_HOMCHL002563	0.10103	0.1307	1.2935	0.06582	0.1636	2.4861
UM_HOMCHL002567	0.00529	0.1386	26.2124	0.00981	0.2027	20.6577
UM_HOMCHL002570	0.0053	0.1429	26.9603	0.00503	0.2094	41.5949
UM_HOMCHL002574	0.00721	0.169	23.4233	0.04717	0.1167	2.473
UM_HOMCHL002584	0.03477	0.1283	3.6889	0.01305	0.1631	12.5002
UM_HOMCHL002595	0.04371	0.0952	2.1774	0.00665	0.1416	21.2817
UM_HOMCHL002602	0.00604	0.1572	26.0283	0.00888	0.2785	31.36
UM_HOMCHL002606	0.01455	0.1743	11.9824	0.09083	0.1442	1.5881
UM_HOMCHL002613	0.02934	0.0863	2.9424	0.0028	0.111	39.6595
UM_HOMCHL002615	0.00568	0.1426	25.0921	0.00552	0.1875	33.9473
UM_HOMCHL002622	0.0069	0.1613	23.3821	0.06365	0.17	2.6704
UM_HOMCHL002623	0.00555	0.1743	31.3859	0.08651	0.213	2.4625
UM_HOMCHL002627	0.05302	0.1034	1.9503	0.04546	0.1235	2.7179
UM_HOMCHL002630	0.07638	0.0973	1.274	0.03687	0.1172	3.1781
UM_HOMCHL002639	0.07177	0.1402	1.9543	0.05958	0.119	1.9969
UM_HOMCHL002641	0.00523	0.1599	30.5548	0.01054	0.2544	24.1285
UM_HOMCHL002642	0.00688	0.1269	18.4353	0.09847	0.1828	1.8564
UM_HOMCHL002650	0.14207	0.1561	1.0988	0.03221	0.1251	3.8845
UM_HOMCHL002651	0.04124	0.0915	2.2199	0.00406	0.1198	29.5174
UM_HOMCHL002653	0.02604	0.1525	5.8566	0.04348	0.172	3.9574
UM_HOMCHL002656	0.00244	0.0805	33.0435	0.02722	0.0815	2.9947
UM_HOMCHL002657	0.08848	0.1152	1.3022	0.00512	0.1512	29.5079
UM_HOMCHL002670	0.03898	0.11	2.8207	0.01326	0.0967	7.2916
UM_HOMCHL002671	0.0795	0.1269	1.5965	0.00363	0.1349	37.1437
UM_HOMCHL002675	0.04505	0.1981	4.3972	0.10177	0.1813	1.7818
UM_HOMCHL002678	0.00402	0.0835	20.7705	0.00379	0.1062	28.0006
UM_HOMCHL002685	0.04136	0.1252	3.0271	0.00406	0.1187	29.2428
UM_HOMCHL002690	0.00582	0.1566	26.9211	0.04323	0.1864	4.3118
UM_HOMCHL002692	0.00586	0.1368	23.3373	0.05643	0.1109	1.9642
UM_HOMCHL002708	0.00804	0.1564	19.4422	0.07075	0.2417	3.4157
UM_HOMCHL002719	0.00891	0.1745	19.5869	0.00639	0.1573	24.5954
UM_HOMCHL002732	0.02826	0.072	2.5471	0.02214	0.0904	4.081
UM_HOMCHL002734	0.01362	0.1599	11.7392	0.03006	0.1278	4.2511
UM_HOMCHL002735	0.04533	0.1201	2.6497	0.06763	0.1331	1.9673
UM_HOMCHL002737	0.00442	0.1023	23.1387	0.00701	0.173	24.6576
UM_HOMCHL002741	0.01517	0.1926	12.6979	0.08981	0.2773	3.0878
UM_HOMCHL002742	0.00627	0.1229	19.595	0.00453	0.1684	37.145
UM_HOMCHL002744	0.00701	0.1643	23.4559	0.02711	0.1258	4.6385
UM_HOMCHL002749	0.00391	0.1183	30.2202	0.05321	0.1121	2.1073
UM_HOMCHL002750	0.09598	0.1443	1.504	0.0062	0.1685	27.1904
UM_HOMCHL002753	0.01821	0.1372	7.5381	0.0061	0.1201	19.6916
UM_HOMCHL002755	0.02524	0.124	4.9147	0.0797	0.1524	1.9128
UM_HOMCHL002759	0.11271	0.1807	1.6031	0.10029	0.1243	1.2391
UM_HOMCHL002760	0.13999	0.145	1.0356	0.047	0.1587	3.376
UM_HOMCHL002762	0.00449	0.1093	24.3607	0.00571	0.1954	34.2365
UM_HOMCHL002771	0.06173	0.1063	1.7215	0.04636	0.119	2.5672
UM_HOMCHL002773	0.00707	0.1321	18.6832	0.00561	0.1542	27.4728
UM_HOMCHL002778	0.02372	0.113	4.7624	0.04833	0.1775	3.6733
UM_HOMCHL002779	0.03089	0.0958	3.1025	0.05777	0.1051	1.8186
UM_HOMCHL002784	0.07038	0.1447	2.0555	0.09645	0.1709	1.7714
UM_HOMCHL002800	0.10716	0.1089	1.0163	0.03691	0.1544	4.1827
UM_HOMCHL002802	0.00576	0.1462	25.3877	0.1048	0.1697	1.6196
UM_HOMCHL002809	0.00541	0.122	22.5406	0.01172	0.1265	10.7907
UM_HOMCHL002816	0.00699	0.1489	21.3147	0.00524	0.1886	35.9848
UM_HOMCHL002819	0.00669	0.178	26.6033	0.09551	0.2741	2.8701
UM_HOMCHL002824	0.07169	0.0934	1.3034	0.03412	0.1628	4.7724
UM_HOMCHL002831	0.08555	0.1464	1.7116	0.05148	0.1721	3.3441
UM_HOMCHL002834	0.02823	0.0719	2.5461	0.02988	0.0943	3.1572
UM_HOMCHL002835	0.00551	0.1212	21.9949	0.00296	0.0832	28.1326
UM_HOMCHL002836	0.02783	0.1116	4.0109	0.03635	0.1517	4.1748
UM_HOMCHL002838	0.06788	0.0909	1.3385	0.08355	0.1409	1.6862
UM_HOMCHL002840	0.06021	0.1788	2.9689	0.19274	0.1287	0.6677
UM_HOMCHL002848	0.05575	0.185	3.3174	0.03532	0.152	4.3032
UM_HOMCHL002849	0.00391	0.0249	6.3679	0.00385	0.0536	13.92
UM_HOMCHL002861	0.10661	0.1699	1.5934	0.12195	0.312	2.5581
UM_HOMCHL002870	0.04108	0.1488	3.6228	0.00669	0.206	30.7989
UM_HOMCHL002873	0.00707	0.1625	22.9793	0.10836	0.152	1.4024
UM_HOMCHL002876	0.07639	0.1334	1.7467	0.00732	0.1715	23.4337
UM_HOMCHL002877	0.07304	0.1047	1.4331	0.05502	0.1407	2.5569
UM_HOMCHL002878	0.0993	0.0769	0.7745	0.03207	0.0847	2.6415
UM_HOMCHL002883	0.07355	0.1215	1.6525	0.04183	0.1308	3.1265
UM_HOMCHL002886	0.00637	0.1461	22.9466	0.02371	0.1579	6.6594
UM_HOMCHL002890	0.16945	0.1245	0.7344	0.05276	0.1418	2.6881
UM_HOMCHL002892	0.02026	0.1216	6.0003	0.00371	0.1078	29.0567
UM_HOMCHL002894	0.00719	0.1496	20.8121	0.04818	0.1317	2.7336
UM_HOMCHL002895	0.06108	0.1259	2.0619	0.0311	0.129	4.1461
UM_HOMCHL002897	0.00644	0.1443	22.4181	0.06429	0.2	3.1101
UM_HOMCHL002910	0.00577	0.1499	25.9918	0.01629	0.1483	9.1024
UM_HOMCHL002919	0.03701	0.1071	2.8936	0.0041	0.105	25.5748
UM_HOMCHL002926	0.06519	0.1015	1.5561	0.07294	0.1438	1.9712
UM_HOMCHL002936	0.04918	0.1379	2.8035	0.06139	0.1593	2.5957
UM_HOMCHL002942	0.00986	0.1371	13.9059	0.00506	0.1656	32.7081
UM_HOMCHL002950	0.09797	0.1865	1.9034	0.08142	0.1594	1.9579
UM_HOMCHL002955	0.00639	0.1454	22.7529	0.13565	0.2039	1.5028
UM_HOMCHL002959	0.10789	0.1367	1.2666	0.08094	0.1328	1.6407
UM_HOMCHL002961	0.02862	0.0688	2.4036	0.003	0.0879	29.3008
UM_HOMCHL002962	0.00581	0.1486	25.5918	0.01698	0.3102	18.2681
UM_HOMCHL002964	0.04909	0.0848	1.727	0.02815	0.0968	3.4384
UM_HOMCHL002969	0.09319	0.1268	1.361	0.09291	0.1616	1.7391
UM_HOMCHL002996	0.03288	0.1073	3.2632	0.03869	0.1348	3.4834
UM_HOMCHL003003	0.00445	0.1065	23.9077	0.00431	0.1536	35.6333
UM_HOMCHL003026	0.00611	0.14	22.9023	0.06651	0.147	2.21
UM_HOMCHL003039	0.16896	0.1398	0.8271	0.02101	0.3373	16.0527
UM_HOMCHL003040	0.00488	0.1214	24.8705	0.01166	0.1358	11.6519
UM_HOMCHL003041	0.05504	0.1304	2.3692	0.02244	0.1388	6.185
UM_HOMCHL003044	0.1056	0.1628	1.5414	0.12605	0.1704	1.3516
UM_HOMCHL003053	0.07107	0.0837	1.1781	0.01133	0.1152	10.1679
UM_HOMCHL003060	0.00544	0.1608	29.5492	0.06697	0.2573	3.8416
UM_HOMCHL003064	0.03008	0.059	1.9618	0.0038	0.0964	25.3715
UM_HOMCHL003067	0.05995	0.1607	2.6809	0.10046	0.218	2.1701
UM_HOMCHL003068	0.06473	0.0938	1.4495	0.00308	0.1268	41.2134
UM_HOMCHL003070	0.18776	0.1792	0.9544	0.11856	0.2568	2.1659
UM_HOMCHL003082	0.00666	0.1919	28.8076	0.0071	0.2195	30.9401
UM_HOMCHL003088	0.05032	0.1242	2.4677	0.00509	0.1555	30.5778
UM_HOMCHL003090	0.05467	0.1031	1.8853	0.02008	0.1459	7.2662
UM_HOMCHL003094	0.0381	0.1116	2.9297	0.05343	0.1277	2.3905
UM_HOMCHL003105	0.11499	0.1631	1.4186	0.14019	0.2132	1.521
UM_HOMCHL003109	0.00587	0.1407	23.9686	0.06212	0.1507	2.4256
UM_HOMCHL003114	0.05309	0.1445	2.7224	0.14067	0.1554	1.1045
UM_HOMCHL003116	0.00711	0.1712	24.0761	0.08565	0.2331	2.7212
UM_HOMCHL003119	0.03051	0.0907	2.9721	0.03397	0.0929	2.7352
UM_HOMCHL003135	0.05192	0.1235	2.3778	0.02964	0.1335	4.503
UM_HOMCHL003144	0.11965	0.1329	1.1105	0.02027	0.1506	7.4317
UM_HOMCHL003147	0.10608	0.1437	1.3546	0.04723	0.1898	4.0184
UM_HOMCHL003148	0.00586	0.1417	24.1733	0.05312	0.1444	2.7171
UM_HOMCHL003167	0.00309	0.0868	28.0895	0.00977	0.1255	12.8501
UM_HOMCHL003173	0.00444	0.1561	35.1939	0.0417	0.126	3.0213
UM_HOMCHL003175	0.03688	0.0965	2.6166	0.04603	0.1065	2.3136
UM_HOMCHL003177	0.02242	0.1306	5.8266	0.00996	0.2503	25.1288
UM_HOMCHL003180	0.00997	0.1887	18.9193	0.00348	0.1376	39.4875
UM_HOMCHL003191	0.00893	0.1831	20.5167	0.09963	0.1541	1.5468
UM_HOMCHL003204	0.01559	0.1337	8.5726	0.10232	0.1524	1.4895
UM_HOMCHL003207	0.0222	0.1195	5.3799	0.04842	0.1344	2.7749
UM_HOMCHL003211	0.03649	0.1387	3.8018	0.11558	0.1985	1.717
UM_HOMCHL003218	0.07111	0.1279	1.7986	0.05646	0.1443	2.5567
UM_HOMCHL003219	0.12158	0.1694	1.3932	0.04505	0.1945	4.3172
UM_HOMCHL003224	0.0786	0.1504	1.9134	0.02661	0.2227	8.3691
UM_HOMCHL003247	0.03225	0.1314	4.0738	0.00304	0.1131	37.2326
UM_HOMCHL003252	0.05112	0.1373	2.6862	0.06729	0.2021	3.0029
UM_HOMCHL003258	0.00257	0.0552	21.4456	0.00425	0.0764	17.9654
UM_HOMCHL003269	0.07471	0.1168	1.5627	0.01427	0.1272	8.9144
UM_HOMCHL003270	0.04327	0.1264	2.9212	0.05631	0.1645	2.9223
UM_HOMCHL003271	0.02673	0.0362	1.354	0.01927	0.1209	6.2754
UM_HOMCHL003272	0.0062	0.1746	28.1585	0.08468	0.1743	2.0587
UM_HOMCHL003276	0.04309	0.1433	3.3267	0.01766	0.1499	8.4884
UM_HOMCHL003277	0.00655	0.1493	22.7811	0.07879	0.1411	1.7914
UM_HOMCHL003306	0.13601	0.1664	1.2239	0.02528	0.1622	6.4148
UM_HOMCHL003307	0.00789	0.2204	27.9378	0.18035	0.2891	1.6032
UM_HOMCHL003327	0.00772	0.1436	18.617	0.00812	0.5328	65.6534
UM_HOMCHL003329	0.01261	0.1587	12.5896	0.00476	0.1443	30.3086
UM_HOMCHL003344	0.00355	0.1119	31.5679	0.00351	0.1119	31.5679
UM_HOMCHL003351	0.06523	0.1368	2.0974	0.05071	0.1764	3.4789
UM_HOMCHL003352	0.08322	0.1116	1.3416	0.05231	0.1209	2.3117
UM_HOMCHL003364	0.11731	0.1275	1.0872	0.06569	0.1503	2.2874
UM_HOMCHL003368	0.00502	0.1529	30.465	0.09939	0.1458	1.4672
UM_HOMCHL003388	0.07805	0.1407	1.8028	0.04284	0.2464	5.7517
UM_HOMCHL003391	0.0508	0.1427	2.8096	0.0168	0.1727	10.2799
UM_HOMCHL003395	0.1521	0.1885	1.239	0.06827	0.1942	2.8452
UM_HOMCHL003428	0.05169	0.109	2.1082	0.08863	0.1273	1.4362
UM_HOMCHL003435	0.00773	0.1603	20.7451	0.0106	0.297	28.0298
UM_HOMCHL003440	0.03281	0.1374	4.1893	0.05417	0.1404	2.5914
UM_HOMCHL003445	0.05754	0.1473	2.5592	0.03711	0.1184	3.1892
UM_HOMCHL003470	0.01121	0.1565	13.9616	0.10032	0.3004	2.9942
UM_HOMCHL003480	0.00967	0.2189	22.6507	0.06711	0.3469	5.1692
UM_HOMCHL003481	0.00698	0.1886	27.0223	0.00626	0.2273	36.3227
UM_HOMCHL003482	0.0062	0.1402	22.6193	0.00427	0.141	33.0352
UM_HOMCHL003494	0.12222	0.1168	0.9554	0.02645	0.1138	4.3014
UM_HOMCHL003501	0.00657	0.1794	27.3012	0.0061	0.2907	47.68
UM_HOMCHL003503	0.0075	0.139	18.5203	0.00427	0.1516	35.5292
UM_HOMCHL003509	0.05247	0.0959	1.8271	0.04159	0.0738	1.7742
UM_HOMCHL003540	0.0075	0.1694	22.5892	0.00514	0.1853	36.0259
UM_HOMCHL003549	0.00629	0.1512	24.0271	0.0059	0.2024	34.2709
UM_HOMCHL003559	0.00534	0.1463	27.4112	0.00597	0.1457	24.3961
UM_HOMCHL003561	0.20021	0.1492	0.7452	0.00953	0.22	23.0779
UM_HOMCHL003570	0.00528	0.1369	25.9507	0.01055	0.2374	22.4945
UM_HOMCHL003579	0.00732	0.167	22.824	0.20902	0.3731	1.7851
UM_HOMCHL003585	0.00788	0.1219	15.4556	0.03811	0.119	3.1246
UM_HOMCHL003602	0.00581	0.1257	21.652	0.01835	0.1148	6.2559
UM_HOMCHL003613	0.02762	0.1348	4.8792	0.03594	0.1405	3.9085
UM_HOMCHL003631	0.0068	0.1562	22.9659	0.04359	0.1781	4.0866
UM_HOMCHL003633	0.00671	0.2182	32.5286	0.08056	0.1391	1.7269
UM_HOMCHL003634	0.00594	0.122	20.5584	0.07056	0.1524	2.1597
UM_HOMCHL003647	0.00415	0.1096	26.4161	0.00596	0.1241	20.8246
UM_HOMCHL003651	0.19905	0.1039	0.5221	0.00662	0.2571	38.8229
UM_HOMCHL003655	0.03981	0.0583	1.4648	0.01706	0.0668	3.9138
UM_HOMCHL003658	0.00596	0.158	26.5227	0.00793	0.2801	35.3299
UM_HOMCHL003669	0.11471	0.1834	1.5989	0.16234	0.2398	1.4774
UM_HOMCHL003691	0.00668	0.1676	25.2231	0.00664	0.1676	25.2231
UM_HOMCHL003711	0.13151	0.1235	0.9393	0.10489	0.2107	2.009
UM_HOMCHL003715	0.01206	0.2223	18.4338	0.07595	0.2102	2.7671
UM_HOMCHL003749	0.0068	0.1694	24.9237	0.11999	0.3776	3.1473
UM_HOMCHL003760	0.05218	0.1082	2.0736	0.00608	0.2281	37.4946
UM_HOMCHL003764	0.12009	0.1201	1.0005	0.25698	0.2061	0.8022
UM_HOMCHL003794	0.08841	0.1804	2.041	0.00983	0.2396	24.3774
UM_HOMCHL003832	0.12126	0.1971	1.6254	0.14323	0.2625	1.8324
UM_HOMCHL003842	0.1362	0.1663	1.2211	0.04779	0.1506	3.1504
UM_HOMCHL003855	0.00539	0.1424	26.4017	0.05083	0.145	2.8536
UM_HOMCHL003857	0.00578	0.146	25.2479	0.04488	0.123	2.7408
UM_HOMCHL003865	0.07178	0.1753	2.4426	0.00895	0.2321	25.9403
UM_HOMCHL003866	0.01026	0.1746	17.0215	0.01068	0.1963	18.3894
UM_HOMCHL003875	0.06705	0.1564	2.3326	0.0481	0.2532	5.2632
UM_HOMCHL003886	0.01713	0.2427	14.1674	0.00863	0.3656	42.389
UM_HOMCHL003915	0.00798	0.1868	23.4067	0.00887	0.2232	25.1712
UM_HOMCHL003922	0.08022	0.17	2.1187	0.01624	0.1586	9.7668
UM_HOMCHL003936	0.00898	0.1973	21.9719	0.00622	0.2368	38.0686
UM_HOMCHL003954	0.00637	0.1825	28.6735	0.00389	0.2969	76.3904
UM_HOMCHL003990	0.01509	0.179	11.8595	0.02684	0.1901	7.0825
UM_HOMCHL004059	0.05463	0.1675	3.0658	0.00547	0.24	43.8785
UM_HOMCHL004087	0.00582	0.1555	26.7213	0.00507	0.157	30.9767
UM_HOMCHL004099	0.00857	0.1617	18.8637	0.0332	0.1394	4.1983
UM_HOMCHL004106	0.00889	0.1721	19.355	0.12792	0.4725	3.6939
UM_HOMCHL004117	0.03866	0.1436	3.7132	0.0051	0.2476	48.5317
UM_HOMCHL004162	0.00966	0.196	20.2933	0.13985	0.3157	2.2572
UM_HOMCHL004179	0.0037	0.1383	37.3358	0.00476	0.147	30.9222
UM_HOMCHL004204	0.06406	0.169	2.6383	0.00433	0.1221	28.1982
UM_HOMCHL004213	0.02358	0.2344	9.9409	0.24991	0.3601	1.4407
UM_HOMCHL004221	0.02156	0.0746	3.457	0.01015	0.1068	10.5173
UM_HOMCHL004259	0.01051	0.1605	15.2703	0.24732	0.7099	2.8702
UM_HOMCHL004261	0.008	0.1961	24.5083	0.09146	0.1407	1.5388
UM_HOMCHL004329	0.00831	0.2005	24.1277	0.01816	0.1413	7.7808
UM_HOMCHL004386	0.00921	0.1364	14.8164	0.10792	0.174	1.6127
UM_HOMCHL004495	0.07463	0.1404	1.882	0.00595	0.2157	36.2327
UM_HOMCHL004497	0.00749	0.1733	23.1369	0.12885	0.2842	2.2054
UM_HOMCHL004567	0.01136	0.2045	18.0029	0.11812	0.2271	1.9228
UM_HOMCHL004569	0.01963	0.1544	7.8625	0.14466	0.2215	1.5312
UM_HOMCHL004597	0.05157	0.1858	3.6019	0.10876	0.1532	1.4087
UM_HOMCHL004687	0.00603	0.144	23.8706	0.0054	0.1987	36.8061
UM_HOMCHL004722	0.03107	0.1491	4.7986	0.0043	0.098	22.8065
UM_HOMCHL004775	0.05523	0.1468	2.6584	0.00388	0.1877	48.378
UM_HOMCHL004912	0.07265	0.1439	1.9811	0.05849	0.1499	2.5636
UM_HOMCHL004928	0.01452	0.1321	9.1013	0.04961	0.1261	2.5411
UM_HOMCHL004963	0.12814	0.0892	0.6957	0.00457	0.2291	50.1427
UM_HOMCHL005051	0.0044	0.1368	31.1347	0.00295	0.0995	33.7477
UM_HOMCHL005087	0.00429	0.1387	32.332	0.00473	0.3145	66.4805
UM_HOMCHL005095	0.05466	0.0876	1.6029	0.05057	0.2012	3.9776
UM_HOMCHL005226	0.00377	0.1103	29.2454	0.02636	0.0465	1.7623
Average	0.0430597	0.119009	9.38322	0.0433428	0.147918	10.6698
Median	0.03477	0.1171	2.7428	0.03491	0.1391	3.376
