# Supplementary material for: Genome-wide patterns of selection–drift variation strongly associate with organismal traits across the green plant lineage
Source: Genome Res. 2024 Aug;34(8):1130–9. doi: 10.1101/gr.279002.124 (PMC11444171; doi:10.1101/gr.279002.124)
Supplement: Supplement 17 [file Supplemental_Table_S5.xlsx]

## Sheet: Table_S6_Liberal_Life_Cycles
Supplemental Table S5: PAML outputs for life cycle based models of liberal dataset. Lists the dN, dS and dN/dS values of low copy genes of haploid, haploid-diploid and diploid algae from liberal dataset.
	Haploid			Haploid-diploid			Diploid
	dN/dS	dN	dS	dN/dS	dN	dS	dN/dS	dN	dS
Lb_HOMCHL000439	0.07217	0.0395	0.5471	0.02487	0.1469	5.9063	0.00408	0.0893	21.8759
Lb_HOMCHL000496	0.13087	0.078	0.5957	0.03533	0.0716	2.0252	0.00438	0.1002	22.9021
Lb_HOMCHL000545	0.07946	0.145	1.8254	0.05989	0.1734	2.8952	0.01023	0.2439	23.8543
Lb_HOMCHL000664	0.12278	0.0612	0.4982	0.04523	0.065	1.4364	0.0028	0.1107	39.4987
Lb_HOMCHL000732	0.00434	0.0579	13.3452	0.0022	0.0807	36.6628	0.02149	0.0854	3.9719
Lb_HOMCHL000737	0.07441	0.0615	0.8258	0.04936	0.0541	1.0972	0.00215	0.1047	48.679
Lb_HOMCHL000773	0.10657	0.0849	0.7968	0.00364	0.1096	30.1201	0.0051	0.2178	42.7254
Lb_HOMCHL000781	0.05549	0.0368	0.664	0.01332	0.0269	2.0214	0.00124	0.0499	40.3576
Lb_HOMCHL000789	0.08207	0.113	1.3774	0.0792	0.2076	2.6213	0.00629	0.2305	36.6552
Lb_HOMCHL000807	0.10324	0.1018	0.9863	0.02386	0.1536	6.4398	0.00211	0.0966	45.8142
Lb_HOMCHL000817	0.00525	0.0576	10.9545	0.00437	0.0795	18.2037	0.00449	0.0795	18.2037
Lb_HOMCHL000826	0.165	0.1249	0.757	0.05951	0.1292	2.1707	0.02289	0.4526	19.7764
Lb_HOMCHL000844	0.04352	0.0334	0.7682	0.01874	0.0377	2.0119	0.00724	0.0333	4.605
Lb_HOMCHL000878	0.0179	0.1147	6.4081	0.04407	0.1237	2.8063	0.05015	0.1366	2.7229
Lb_HOMCHL000897	0.03761	0.1038	2.7607	0.00576	0.2271	39.4389	0.00419	0.2822	67.3492
Lb_HOMCHL000921	0.06749	0.0493	0.7304	0.01053	0.0513	4.871	0.00224	0.076	33.981
Lb_HOMCHL000944	0.08674	0.0495	0.5702	0.03565	0.0606	1.7009	0.00188	0.0712	37.8326
Lb_HOMCHL000952	0.03944	0.0678	1.7191	0.02046	0.0759	3.711	0.00383	0.0915	23.8983
Lb_HOMCHL000959	0.03082	0.091	2.9516	0.03527	0.0844	2.3922	0.00914	0.1339	14.6528
Lb_HOMCHL000962	0.06789	0.0415	0.6121	0.0094	0.0441	4.6926	0.00337	0.0756	22.4311
Lb_HOMCHL000964	0.05131	0.0685	1.3346	0.02992	0.0764	2.5539	0.01871	0.2502	13.3742
Lb_HOMCHL000975	0.1664	0.1023	0.6146	0.04507	0.118	2.6176	0.00415	0.2075	50.0243
Lb_HOMCHL000977	0.04692	0.041	0.8746	0.02055	0.03	1.4581	0.00233	0.0524	22.4823
Lb_HOMCHL000979	0.07512	0.0605	0.8059	0.03252	0.0589	1.8122	0.01492	0.1185	7.9415
Lb_HOMCHL000982	0.05121	0.0889	1.7357	0.02605	0.0946	3.6301	0.00776	0.0923	11.8999
Lb_HOMCHL000998	0.0549	0.0447	0.8149	0.01847	0.0468	2.5318	0.00112	0.0513	45.8576
Lb_HOMCHL001007	0.06974	0.0677	0.9703	0.01056	0.0558	5.2885	0.03038	0.0953	3.1359
Lb_HOMCHL001008	0.11695	0.0965	0.8255	0.04447	0.0969	2.1778	0.00321	0.1366	42.5063
Lb_HOMCHL001026	0.08716	0.0693	0.7947	0.05526	0.0811	1.4679	0.00219	0.1038	47.3517
Lb_HOMCHL001040	0.11298	0.1085	0.9603	0.04515	0.13	2.8802	0.00552	0.2079	37.6715
Lb_HOMCHL001069	0.04776	0.0679	1.4218	0.06058	0.0928	1.5314	0.00227	0.0992	43.694
Lb_HOMCHL001123	0.03927	0.0396	1.009	0.01411	0.0385	2.7265	0.00502	0.062	12.3347
Lb_HOMCHL001141	0.07449	0.0757	1.0162	0.01475	0.1181	8.0105	0.01328	0.1522	11.4653
Lb_HOMCHL001147	0.08733	0.0747	0.8553	0.0137	0.0704	5.138	0.00437	0.0889	20.3419
Lb_HOMCHL001154	0.07587	0.1142	1.505	0.03464	0.0884	2.5519	0.01151	0.14	12.1585
Lb_HOMCHL001160	0.09014	0.0623	0.6911	0.0105	0.0584	5.5588	0.00367	0.0767	20.889
Lb_HOMCHL001161	0.08611	0.1031	1.197	0.00412	0.1262	30.6355	0.00364	0.1649	45.2914
Lb_HOMCHL001169	0.0054	0.1269	23.5093	0.04228	0.2148	5.0805	0.0045	0.2208	49.0272
Lb_HOMCHL001170	0.14484	0.0865	0.5974	0.02677	0.0953	3.561	0.00956	0.1274	13.3355
Lb_HOMCHL001173	0.10177	0.105	1.032	0.06504	0.1073	1.6499	0.00404	0.15	37.156
Lb_HOMCHL001175	0.03316	0.1839	5.5457	0.03717	0.1491	4.0126	0.07056	0.2093	2.9664
Lb_HOMCHL001177	0.10114	0.1136	1.1235	0.04938	0.1616	3.272	0.00527	0.1936	36.7676
Lb_HOMCHL001182	0.05412	0.1062	1.963	0.03667	0.0908	2.4754	0.0056	0.1892	33.7908
Lb_HOMCHL001203	0.02113	0.1148	5.4307	0.03286	0.0757	2.3051	0.04949	0.112	2.2621
Lb_HOMCHL001205	0.03911	0.0356	0.9108	0.01681	0.035	2.0816	0.00243	0.0705	28.9729
Lb_HOMCHL001216	0.01454	0.0578	3.9733	0.00203	0.0732	36.0115	0.00222	0.0771	34.7237
Lb_HOMCHL001217	0.03152	0.0737	2.3396	0.02705	0.1208	4.4648	0.01105	0.2851	25.8016
Lb_HOMCHL001230	0.04509	0.0885	1.9617	0.02761	0.0901	3.2636	0.00716	0.1191	16.6308
Lb_HOMCHL001240	0.1115	0.1604	1.4386	0.01178	0.2175	18.4693	0.05009	0.2827	5.6449
Lb_HOMCHL001242	0.05895	0.0576	0.9764	0.02831	0.0711	2.5106	0.00276	0.1335	48.3536
Lb_HOMCHL001248	0.0092	0.1262	13.7158	0.10553	0.1494	1.4161	0.00336	0.1176	34.9983
Lb_HOMCHL001253	0.10225	0.1048	1.0255	0.04575	0.1131	2.4724	0.01093	0.1665	15.2423
Lb_HOMCHL001258	0.00546	0.1258	23.0545	0.00599	0.159	26.5464	0.00532	0.2422	45.5676
Lb_HOMCHL001261	0.06318	0.0853	1.3497	0.05702	0.0939	1.6465	0.01341	0.0893	6.6609
Lb_HOMCHL001265	0.02171	0.1033	4.7567	0.05711	0.1125	1.9702	0.0041	0.1332	32.4852
Lb_HOMCHL001273	0.11044	0.0698	0.6319	0.00238	0.085	35.7519	0.00421	0.1116	26.5203
Lb_HOMCHL001274	0.06289	0.0478	0.7599	0.02671	0.0512	1.9176	0.00182	0.0731	40.2271
Lb_HOMCHL001278	0.04551	0.0353	0.7747	0.03236	0.0421	1.3001	0.0017	0.0529	31.136
Lb_HOMCHL001285	0.01856	0.115	6.1976	0.06526	0.1375	2.1061	0.00597	0.1815	30.4172
Lb_HOMCHL001287	0.03337	0.1106	3.3142	0.0272	0.074	2.7216	0.00543	0.3287	60.5559
Lb_HOMCHL001292	0.0053	0.0845	15.9509	0.00268	0.0943	35.2478	0.00278	0.0943	35.2478
Lb_HOMCHL001293	0.00671	0.1317	19.6382	0.06767	0.173	2.556	0.00735	0.2538	34.5175
Lb_HOMCHL001305	0.08024	0.1607	2.0026	0.05529	0.1662	3.0062	0.00512	0.2258	44.1209
Lb_HOMCHL001327	0.07834	0.0829	1.0588	0.07869	0.1122	1.4261	0.00299	0.1203	40.1866
Lb_HOMCHL001339	0.0147	0.1033	7.0281	0.03142	0.1076	3.426	0.00374	0.1663	44.4905
Lb_HOMCHL001344	0.07486	0.0958	1.2794	0.04578	0.1035	2.2619	0.00483	0.1658	34.317
Lb_HOMCHL001356	0.00994	0.1254	12.6125	0.06302	0.1273	2.0209	0.00782	0.1771	22.6573
Lb_HOMCHL001359	0.07281	0.0681	0.9358	0.02665	0.0741	2.7802	0.00302	0.1104	36.5906
Lb_HOMCHL001361	0.05369	0.1695	3.1565	0.08642	0.1565	1.8109	0.00519	0.2524	48.6429
Lb_HOMCHL001362	0.00408	0.0832	20.3875	0.06326	0.0891	1.4087	0.0054	0.1414	26.1762
Lb_HOMCHL001367	0.03387	0.082	2.4226	0.00359	0.0735	20.4871	0.00173	0.0866	50.1468
Lb_HOMCHL001369	0.00424	0.0865	20.3865	0.02032	0.0921	4.5325	0.00327	0.1022	31.2183
Lb_HOMCHL001370	0.04082	0.0968	2.3719	0.06552	0.1063	1.6218	0.02533	0.1162	4.5855
Lb_HOMCHL001372	0.00419	0.0994	23.7097	0.00332	0.1142	34.4193	0.01426	0.236	16.5509
Lb_HOMCHL001374	0.10258	0.11	1.0724	0.05957	0.1202	2.0171	0.00562	0.1931	34.3438
Lb_HOMCHL001387	0.04614	0.0911	1.9735	0.03158	0.1014	3.2095	0.00564	0.1079	19.1472
Lb_HOMCHL001395	0.1419	0.118	0.8316	0.07511	0.1397	1.8607	0.02894	0.2459	8.4939
Lb_HOMCHL001409	0.05101	0.0795	1.5584	0.06853	0.0864	1.261	0.00311	0.1716	55.2518
Lb_HOMCHL001412	0.1367	0.1113	0.8144	0.09619	0.1401	1.457	0.00315	0.1166	37.0623
Lb_HOMCHL001414	0.05969	0.0876	1.4669	0.02243	0.0961	4.2824	0.0049	0.1398	28.5281
Lb_HOMCHL001415	0.04962	0.1128	2.2741	0.05193	0.1419	2.7322	0.0038	0.2084	54.822
Lb_HOMCHL001427	0.00467	0.1275	27.2998	0.00772	0.1932	25.0234	0.01365	0.352	25.7892
Lb_HOMCHL001433	0.11146	0.1464	1.3136	0.08138	0.1533	1.8839	0.02387	0.1853	7.764
Lb_HOMCHL001434	0.07325	0.1163	1.5882	0.03331	0.216	6.4843	0.01455	0.2292	15.7547
Lb_HOMCHL001438	0.01792	0.0806	4.4985	0.01987	0.0921	4.6364	0.0056	0.1762	31.4834
Lb_HOMCHL001443	0.05587	0.0594	1.0641	0.03384	0.0778	2.2999	0.02167	0.0923	4.2568
Lb_HOMCHL001445	0.05459	0.0992	1.8177	0.07502	0.1243	1.6568	0.00496	0.1669	33.6693
Lb_HOMCHL001451	0.07593	0.079	1.0407	0.03999	0.0934	2.3361	0.00754	0.1347	17.8705
Lb_HOMCHL001460	0.01522	0.1277	8.3913	0.04584	0.202	4.407	0.00463	0.1876	40.5067
Lb_HOMCHL001467	0.01083	0.1007	9.3024	0.08615	0.1468	1.7041	0.04639	0.3581	7.7176
Lb_HOMCHL001471	0.09843	0.1165	1.1836	0.10396	0.1682	1.6183	0.05313	0.1718	3.2339
Lb_HOMCHL001474	0.11857	0.1034	0.8719	0.01504	0.1231	8.1856	0.004	0.187	46.7934
Lb_HOMCHL001481	0.07091	0.1267	1.7871	0.05474	0.1589	2.9019	0.00553	0.1918	34.7001
Lb_HOMCHL001484	0.06701	0.0728	1.086	0.042	0.0919	2.1886	0.00336	0.1332	39.6431
Lb_HOMCHL001498	0.02093	0.0807	3.8558	0.03725	0.1135	3.0477	0.0034	0.1219	35.8933
Lb_HOMCHL001505	0.13724	0.0792	0.577	0.02974	0.0987	3.3182	0.00362	0.1287	35.5317
Lb_HOMCHL001506	0.09877	0.0646	0.6544	0.05298	0.0911	1.7199	0.00267	0.1297	48.6161
Lb_HOMCHL001512	0.00511	0.085	16.6314	0.00286	0.0746	26.085	0.0024	0.1116	46.5661
Lb_HOMCHL001517	0.13239	0.1521	1.1493	0.0098	0.1558	15.8903	0.00433	0.2342	54.1106
Lb_HOMCHL001526	0.05223	0.092	1.761	0.0432	0.1245	2.8823	0.03088	0.4533	14.6777
Lb_HOMCHL001536	0.04403	0.0792	1.7992	0.04368	0.0756	1.7303	0.00688	0.1118	16.25
Lb_HOMCHL001539	0.03103	0.0765	2.4654	0.01349	0.1095	8.1115	0.00447	0.1784	39.9534
Lb_HOMCHL001550	0.08166	0.0583	0.7144	0.04189	0.0862	2.0578	0.01565	0.1675	10.7033
Lb_HOMCHL001552	0.1014	0.1353	1.3338	0.06558	0.1747	2.6641	0.00473	0.2441	51.6227
Lb_HOMCHL001556	0.13691	0.1451	1.06	0.06714	0.1625	2.4211	0.03135	0.2079	6.6303
Lb_HOMCHL001560	0.14977	0.1374	0.9171	0.04702	0.1427	3.0345	0.01239	0.1556	12.5638
Lb_HOMCHL001563	0.12891	0.1284	0.9964	0.09954	0.1329	1.3354	0.02	0.187	9.352
Lb_HOMCHL001574	0.01479	0.0967	6.5358	0.04183	0.0968	2.3128	0.00509	0.1656	32.5511
Lb_HOMCHL001575	0.08481	0.0823	0.971	0.03815	0.1086	2.846	0.00411	0.1215	29.5931
Lb_HOMCHL001577	0.00443	0.1145	25.8675	0.00497	0.1449	29.1225	0.02178	0.3035	13.9336
Lb_HOMCHL001591	0.0445	0.082	1.8425	0.09258	0.1123	1.2129	0.12545	0.1369	1.0911
Lb_HOMCHL001601	0.03749	0.0715	1.9066	0.01908	0.1049	5.4945	0.00291	0.1255	43.0922
Lb_HOMCHL001610	0.07441	0.0848	1.1403	0.05759	0.1332	2.3137	0.00955	0.135	14.1413
Lb_HOMCHL001616	0.02013	0.1016	5.0477	0.02948	0.1269	4.306	0.01368	0.1383	10.1058
Lb_HOMCHL001619	0.09572	0.1296	1.3541	0.0826	0.1558	1.8857	0.00351	0.1526	43.4956
Lb_HOMCHL001622	0.00523	0.1148	21.9456	0.11319	0.1039	0.9178	0.00343	0.1635	47.6078
Lb_HOMCHL001625	0.00471	0.1111	23.6142	0.02728	0.1837	6.7317	0.00413	0.1756	42.4777
Lb_HOMCHL001629	0.14275	0.1096	0.768	0.10075	0.1147	1.1382	0.03446	0.1582	4.5901
Lb_HOMCHL001630	0.0727	0.0539	0.7419	0.02291	0.0569	2.4839	0.00176	0.0869	49.2545
Lb_HOMCHL001633	0.08405	0.0701	0.8345	0.02704	0.206	7.6183	0.00305	0.1637	53.7054
Lb_HOMCHL001637	0.03753	0.0596	1.5869	0.03278	0.1317	4.0189	0.00349	0.1433	41.0565
Lb_HOMCHL001640	0.15257	0.1183	0.7753	0.00523	0.13	24.8705	0.00472	0.1882	39.8686
Lb_HOMCHL001643	0.02654	0.0751	2.8287	0.02258	0.1135	5.0268	0.00385	0.1463	37.9828
Lb_HOMCHL001652	0.09783	0.1179	1.2054	0.06476	0.117	1.8069	0.09037	0.2235	2.4732
Lb_HOMCHL001655	0.09245	0.1495	1.6167	0.05317	0.1583	2.9781	0.00641	0.3418	53.298
Lb_HOMCHL001662	0.0067	0.1145	17.0852	0.00561	0.1603	28.5858	0.00524	0.1897	36.2016
Lb_HOMCHL001664	0.04054	0.1289	3.1802	0.0049	0.0962	19.6355	0.01839	0.2603	14.1552
Lb_HOMCHL001668	0.00585	0.1129	19.3029	0.06094	0.1324	2.1727	0.00456	0.1902	41.7473
Lb_HOMCHL001671	0.00698	0.1616	23.1436	0.04948	0.1621	3.276	0.12183	0.311	2.5525
Lb_HOMCHL001672	0.05737	0.1739	3.0302	0.03211	0.1948	6.0671	0.05403	0.3277	6.0644
Lb_HOMCHL001674	0.01178	0.1255	10.6587	0.00592	0.1642	27.7169	0.00388	0.2213	57.0113
Lb_HOMCHL001678	0.01181	0.159	13.4676	0.00432	0.1659	38.3712	0.00462	0.2223	48.111
Lb_HOMCHL001687	0.06228	0.0509	0.818	0.01122	0.0914	8.1483	0.00216	0.0496	22.9849
Lb_HOMCHL001689	0.07593	0.0833	1.0968	0.04891	0.0877	1.7932	0.01072	0.1416	13.2072
Lb_HOMCHL001690	0.11381	0.1149	1.0091	0.02868	0.1122	3.9105	0.02515	0.4196	16.6829
Lb_HOMCHL001706	0.05504	0.0691	1.255	0.0289	0.0813	2.8115	0.00824	0.1257	15.2436
Lb_HOMCHL001716	0.00615	0.1468	23.8647	0.05583	0.1823	3.2645	0.01535	0.327	21.3055
Lb_HOMCHL001722	0.03313	0.0729	2.2007	0.03253	0.083	2.5506	0.01509	0.118	7.82
Lb_HOMCHL001725	0.0765	0.0677	0.8845	0.05999	0.0974	1.6231	0.00229	0.0966	42.0863
Lb_HOMCHL001726	0.00705	0.1317	18.6806	0.08925	0.157	1.7593	0.00443	0.2798	63.1203
Lb_HOMCHL001727	0.09393	0.0902	0.9607	0.05567	0.1237	2.2226	0.00659	0.1723	26.1396
Lb_HOMCHL001734	0.07893	0.0738	0.9351	0.04153	0.0809	1.9472	0.00239	0.114	47.6319
Lb_HOMCHL001735	0.03324	0.0835	2.5119	0.00894	0.0923	10.3252	0.01048	0.1429	13.6394
Lb_HOMCHL001742	0.01325	0.0983	7.4175	0.00254	0.0834	32.8894	0.0046	0.195	42.3503
Lb_HOMCHL001751	0.08507	0.0511	0.6003	0.0287	0.0593	2.0665	0.00298	0.09	30.1788
Lb_HOMCHL001754	0.08586	0.1131	1.317	0.08378	0.1262	1.5068	0.027	0.1784	6.6086
Lb_HOMCHL001758	0.06589	0.147	2.2316	0.10699	0.2144	2.0035	0.19406	0.2312	1.1913
Lb_HOMCHL001762	0.0033	0.0901	27.2712	0.00393	0.1244	31.6368	0.00559	0.212	37.9278
Lb_HOMCHL001770	0.01076	0.0953	8.8559	0.00825	0.114	13.8154	0.00646	0.1457	22.5679
Lb_HOMCHL001781	0.08296	0.0882	1.0631	0.04301	0.0798	1.8551	0.00533	0.101	18.9674
Lb_HOMCHL001782	0.00619	0.0947	15.3069	0.00883	0.101	11.4442	0.00413	0.153	37.0829
Lb_HOMCHL001790	0.05979	0.0949	1.5866	0.00504	0.1185	23.5309	0.00318	0.1204	37.8318
Lb_HOMCHL001791	0.10471	0.1379	1.317	0.06664	0.1839	2.76	0.0047	0.2264	48.1393
Lb_HOMCHL001793	0.00446	0.1103	24.7501	0.12464	0.1384	1.1107	0.00356	0.1281	35.9498
Lb_HOMCHL001805	0.00434	0.0949	21.8871	0.06065	0.0982	1.6189	0.00937	0.1953	20.85
Lb_HOMCHL001808	0.08966	0.0617	0.688	0.053	0.0704	1.328	0.00149	0.0577	38.6678
Lb_HOMCHL001813	0.06717	0.0598	0.8907	0.03404	0.0779	2.2879	0.02576	0.2628	10.2026
Lb_HOMCHL001817	0.00323	0.0703	21.749	0.06093	0.091	1.4929	0.00436	0.1344	30.8561
Lb_HOMCHL001819	0.10165	0.0936	0.9212	0.0824	0.1069	1.2972	0.00279	0.1208	43.3331
Lb_HOMCHL001824	0.00611	0.1056	17.2742	0.00589	0.1268	21.5281	0.00559	0.2133	38.141
Lb_HOMCHL001829	0.02283	0.0711	3.1156	0.02911	0.073	2.5079	0.00291	0.1053	36.2348
Lb_HOMCHL001836	0.03253	0.0952	2.9279	0.03766	0.1398	3.7127	0.00454	0.1773	39.0369
Lb_HOMCHL001843	0.06457	0.0922	1.4285	0.07886	0.1282	1.6259	0.07109	0.2125	2.9888
Lb_HOMCHL001844	0.01063	0.1476	13.888	0.08001	0.1536	1.9199	0.00534	0.2154	40.3569
Lb_HOMCHL001855	0.08062	0.1154	1.4308	0.03698	0.1342	3.6279	0.01244	0.2444	19.6474
Lb_HOMCHL001861	0.04585	0.0986	2.1494	0.00301	0.1053	34.9939	0.00821	0.1923	23.42
Lb_HOMCHL001863	0.05093	0.0974	1.9126	0.11835	0.1461	1.2344	0.15303	0.292	1.9083
Lb_HOMCHL001865	0.12013	0.1281	1.0665	0.04585	0.1116	2.4332	0.02018	0.1491	7.3855
Lb_HOMCHL001867	0.05373	0.0817	1.5206	0.0023	0.0794	34.4407	0.00258	0.1167	45.1743
Lb_HOMCHL001875	0.10036	0.0732	0.7294	0.01109	0.1302	11.7412	0.00295	0.1304	44.2004
Lb_HOMCHL001877	0.00564	0.1342	23.8011	0.01135	0.1357	11.9522	0.00379	0.1395	36.8483
Lb_HOMCHL001882	0.0421	0.111	2.6371	0.06821	0.127	1.8623	0.03544	0.1392	3.9292
Lb_HOMCHL001884	0.00969	0.0868	8.955	0.01313	0.1099	8.3685	0.00414	0.1695	40.9505
Lb_HOMCHL001885	0.0416	0.1238	2.9767	0.04809	0.1501	3.1199	0.06394	0.2201	3.442
Lb_HOMCHL001890	0.00642	0.1279	19.94	0.08107	0.1263	1.5582	0.05719	0.1725	3.0162
Lb_HOMCHL001893	0.11075	0.0925	0.8353	0.05837	0.1006	1.7227	0.00329	0.1656	50.3915
Lb_HOMCHL001895	0.00814	0.1616	19.842	0.01295	0.1753	13.5358	0.00472	0.2739	58.0082
Lb_HOMCHL001896	0.04227	0.1312	3.1033	0.03832	0.1623	4.2362	0.03446	0.3427	9.9431
Lb_HOMCHL001897	0.00187	0.0675	35.9849	0.00216	0.0705	32.6077	0.00243	0.1068	43.9588
Lb_HOMCHL001905	0.00947	0.1481	15.6419	0.09085	0.1644	1.81	0.00428	0.1781	41.5815
Lb_HOMCHL001907	0.08329	0.0638	0.7661	0.03538	0.0586	1.657	0.00178	0.0818	45.942
Lb_HOMCHL001909	0.04981	0.0939	1.8856	0.05988	0.1226	2.0471	0.00367	0.1958	53.3934
Lb_HOMCHL001912	0.03295	0.0685	2.0782	0.02602	0.0665	2.555	0.01242	0.1319	10.6238
Lb_HOMCHL001914	0.00621	0.1116	17.9603	0.06482	0.1374	2.1193	0.01253	0.1368	10.9234
Lb_HOMCHL001915	0.08453	0.1229	1.4537	0.03654	0.1602	4.3832	0.0055	0.1879	34.1475
Lb_HOMCHL001917	0.0239	0.0865	3.6199	0.00343	0.1081	31.5435	0.00367	0.1686	45.9763
Lb_HOMCHL001946	0.05142	0.1591	3.0942	0.13808	0.1937	1.4025	0.06212	0.2622	4.2197
Lb_HOMCHL001948	0.04294	0.034	0.7914	0.028	0.0358	1.2771	0.01456	0.053	3.6395
Lb_HOMCHL001955	0.07361	0.0602	0.8177	0.03118	0.0704	2.2588	0.00277	0.1195	43.174
Lb_HOMCHL001956	0.06767	0.106	1.5663	0.06902	0.1344	1.9469	0.00586	0.3005	51.3149
Lb_HOMCHL001959	0.12225	0.0943	0.7716	0.04629	0.2032	4.3902	0.00348	0.1288	37.013
Lb_HOMCHL001965	0.00724	0.1325	18.2918	0.02671	0.1562	5.8484	0.00343	0.1835	53.4227
Lb_HOMCHL001972	0.08569	0.117	1.3651	0.06315	0.1269	2.0089	0.00495	0.1469	29.6929
Lb_HOMCHL001981	0.11301	0.1457	1.2893	0.07299	0.1647	2.256	0.04658	0.2115	4.5394
Lb_HOMCHL001985	0.05915	0.1086	1.8369	0.09533	0.1139	1.1953	0.0045	0.1313	29.1642
Lb_HOMCHL001988	0.06851	0.1377	2.0094	0.05706	0.1246	2.1826	0.037	0.1869	5.0511
Lb_HOMCHL001995	0.04301	0.1023	2.3791	0.04429	0.1001	2.2598	0.02346	0.1334	5.6873
Lb_HOMCHL002007	0.11229	0.1035	0.9216	0.06549	0.1192	1.8198	0.08966	0.0809	0.9023
Lb_HOMCHL002011	0.01786	0.095	5.3177	0.03669	0.1087	2.9632	0.00488	0.1423	29.1341
Lb_HOMCHL002021	0.00898	0.1691	18.8265	0.13288	0.1422	1.0703	0.00564	0.3262	57.8149
Lb_HOMCHL002024	0.08953	0.0801	0.8947	0.07169	0.1296	1.8076	0.00241	0.108	44.8724
Lb_HOMCHL002025	0.1095	0.0794	0.7253	0.00317	0.1204	37.9752	0.00757	0.1561	20.6358
Lb_HOMCHL002033	0.00806	0.1507	18.6989	0.01491	0.3219	21.591	0.00621	0.2785	44.859
Lb_HOMCHL002040	0.11497	0.2004	1.7426	0.14045	0.2033	1.4476	0.01034	0.3685	35.6552
Lb_HOMCHL002041	0.0594	0.0849	1.4289	0.0305	0.0766	2.5113	0.01329	0.0994	7.4747
Lb_HOMCHL002048	0.00654	0.1193	18.2453	0.00377	0.1423	37.7531	0.09604	0.235	2.4471
Lb_HOMCHL002051	0.00701	0.1603	22.8847	0.09898	0.1657	1.6741	0.00473	0.2149	45.4508
Lb_HOMCHL002053	0.01043	0.1744	16.7164	0.00434	0.1764	40.6499	0.00434	0.1764	40.6499
Lb_HOMCHL002062	0.08249	0.072	0.8733	0.0271	0.0651	2.4006	0.0041	0.2643	64.4917
Lb_HOMCHL002074	0.07364	0.1165	1.5813	0.05806	0.1303	2.244	0.00654	0.1829	27.9635
Lb_HOMCHL002097	0.00326	0.0852	26.1501	0.01475	0.1055	7.1517	0.09047	0.1283	1.4179
Lb_HOMCHL002099	0.12743	0.1483	1.1639	0.03175	0.1654	5.2077	0.0088	0.1829	20.7891
Lb_HOMCHL002103	0.06914	0.1007	1.4571	0.04477	0.0883	1.9725	0.00283	0.1323	46.7933
Lb_HOMCHL002112	0.00795	0.1408	17.6635	0.00803	0.1408	17.6635	0.00655	0.2493	38.0655
Lb_HOMCHL002113	0.00528	0.1284	24.3386	0.0057	0.1382	24.2449	0.00417	0.1958	47.0115
Lb_HOMCHL002115	0.05574	0.1327	2.3805	0.03943	0.17	4.3117	0.01292	0.3021	23.3739
Lb_HOMCHL002131	0.07601	0.0844	1.1102	0.02755	0.0773	2.8075	0.00186	0.0659	35.5057
Lb_HOMCHL002132	0.12875	0.1057	0.8208	0.05277	0.1525	2.8908	0.00957	0.1445	15.1004
Lb_HOMCHL002134	0.09102	0.1302	1.4308	0.08583	0.1417	1.6512	0.00245	0.1051	42.8213
Lb_HOMCHL002148	0.02287	0.0617	2.6962	0.02079	0.0373	1.7959	0.00096	0.0414	43.045
Lb_HOMCHL002150	0.00493	0.1326	26.8634	0.00546	0.1375	25.1923	0.00481	0.172	35.7222
Lb_HOMCHL002174	0.03125	0.0423	1.3524	0.02068	0.0541	2.6149	0.00186	0.0902	48.3869
Lb_HOMCHL002176	0.04702	0.0919	1.9555	0.03957	0.0941	2.3787	0.01327	0.1372	10.342
Lb_HOMCHL002181	0.09252	0.1096	1.1845	0.03626	0.1179	3.2504	0.01215	0.1551	12.7618
Lb_HOMCHL002186	0.00738	0.1221	16.5474	0.09157	0.1792	1.9564	0.0038	0.2002	52.6252
Lb_HOMCHL002189	0.03512	0.0661	1.8818	0.0149	0.0637	4.2735	0.00932	0.0817	8.773
Lb_HOMCHL002190	0.01385	0.1024	7.3887	0.03428	0.1083	3.1584	0.00279	0.1311	47.0633
Lb_HOMCHL002193	0.0076	0.1598	21.0215	0.05027	0.1451	2.8864	0.15453	0.3399	2.1996
Lb_HOMCHL002195	0.136	0.1372	1.0088	0.08101	0.1449	1.7883	0.01072	0.1938	18.0689
Lb_HOMCHL002199	0.06977	0.0818	1.1722	0.06267	0.0762	1.2159	0.08349	0.115	1.3775
Lb_HOMCHL002200	0.03723	0.1086	2.9182	0.09112	0.1354	1.4861	0.01733	0.2455	14.1693
Lb_HOMCHL002201	0.00536	0.0994	18.5393	0.00625	0.1326	21.2248	0.00334	0.1433	42.8601
Lb_HOMCHL002204	0.01269	0.0574	4.5188	0.01083	0.0879	8.1117	0.03759	0.0988	2.6267
Lb_HOMCHL002217	0.00678	0.1326	19.5471	0.07829	0.157	2.0054	0.00709	0.4804	67.7673
Lb_HOMCHL002226	0.00683	0.1253	18.351	0.05154	0.2602	5.0478	0.00454	0.2419	53.2929
Lb_HOMCHL002228	0.03362	0.1124	3.3441	0.01596	0.1332	8.3444	0.02454	0.2651	10.8041
Lb_HOMCHL002232	0.09055	0.0591	0.6522	0.03669	0.0577	1.5717	0.00214	0.1066	49.9146
Lb_HOMCHL002236	0.08813	0.1366	1.5504	0.03695	0.1476	3.9941	0.04282	0.295	6.8893
Lb_HOMCHL002237	0.22605	0.1545	0.6836	0.0864	0.2248	2.6015	0.01564	0.2338	14.9494
Lb_HOMCHL002240	0.00756	0.1562	20.6458	0.02813	0.1882	6.6913	0.00511	0.2336	45.7256
Lb_HOMCHL002248	0.00432	0.1138	26.3374	0.00594	0.1472	24.8001	0.0033	0.1573	47.6194
Lb_HOMCHL002254	0.03802	0.1028	2.7033	0.04846	0.0716	1.4769	0.03473	0.0892	2.5696
Lb_HOMCHL002257	0.00469	0.0942	20.0879	0.00644	0.119	18.4703	0.00292	0.1505	51.5384
Lb_HOMCHL002260	0.02164	0.0663	3.0662	0.03009	0.0726	2.4132	0.03993	0.1042	2.61
Lb_HOMCHL002261	0.03207	0.0595	1.854	0.01233	0.0919	7.4535	0.00279	0.1548	55.4008
Lb_HOMCHL002263	0.07866	0.0625	0.7943	0.01577	0.06	3.8087	0.00148	0.0819	55.2459
Lb_HOMCHL002264	0.1011	0.1569	1.552	0.0731	0.1718	2.3495	0.05863	0.2529	4.3137
Lb_HOMCHL002267	0.02197	0.0857	3.9008	0.04359	0.101	2.317	0.0025	0.1396	55.8851
Lb_HOMCHL002271	0.02006	0.1799	8.9644	0.00792	0.1962	24.788	0.00639	0.2238	35.0281
Lb_HOMCHL002272	0.07035	0.1073	1.5255	0.04522	0.2177	4.8148	0.00503	0.2144	42.5852
Lb_HOMCHL002277	0.05351	0.0981	1.8327	0.10108	0.1778	1.7588	0.00401	0.1385	34.5558
Lb_HOMCHL002278	0.06206	0.1513	2.438	0.0044	0.117	26.6157	0.01697	0.2863	16.8672
Lb_HOMCHL002280	0.06044	0.1225	2.0262	0.04604	0.1349	2.931	0.00421	0.1932	45.8927
Lb_HOMCHL002286	0.04196	0.0686	1.6358	0.02118	0.0689	3.2553	0.00198	0.0882	44.4904
Lb_HOMCHL002288	0.08452	0.065	0.7693	0.02648	0.0639	2.4121	0.01179	0.0637	5.3999
Lb_HOMCHL002293	0.10405	0.1162	1.1169	0.08754	0.1355	1.5483	0.00456	0.1586	34.7479
Lb_HOMCHL002303	0.0379	0.1021	2.6925	0.0273	0.1313	4.8087	0.01857	0.135	7.2709
Lb_HOMCHL002305	0.0088	0.149	16.9264	0.00427	0.147	34.4187	0.12814	0.2894	2.2587
Lb_HOMCHL002306	0.00321	0.0736	22.9172	0.02352	0.0825	3.5068	0.04334	0.1537	3.546
Lb_HOMCHL002310	0.01894	0.1296	6.8425	0.00616	0.1251	20.2969	0.00533	0.2879	54.0307
Lb_HOMCHL002313	0.10687	0.1066	0.9977	0.01948	0.1703	8.7394	0.01723	0.1976	11.4654
Lb_HOMCHL002317	0.01839	0.1086	5.9063	0.00534	0.1006	18.8411	0.00384	0.1627	42.4159
Lb_HOMCHL002324	0.02211	0.084	3.801	0.09107	0.0994	1.0913	0.00286	0.1633	57.0145
Lb_HOMCHL002327	0.00399	0.1114	27.9519	0.00555	0.1588	28.5883	0.00776	0.5024	64.7306
Lb_HOMCHL002338	0.05236	0.1398	2.6696	0.02857	0.1298	4.5417	0.01872	0.2163	11.5544
Lb_HOMCHL002340	0.11066	0.1374	1.2413	0.00638	0.145	22.742	0.02324	0.2093	9.0062
Lb_HOMCHL002347	0.03672	0.1053	2.8674	0.04923	0.1398	2.8396	0.0046	0.1659	36.0478
Lb_HOMCHL002361	0.10695	0.1117	1.0447	0.00465	0.1306	28.0868	0.00387	0.168	43.4403
Lb_HOMCHL002363	0.03371	0.0814	2.4159	0.031	0.1251	4.0342	0.00445	0.2161	48.5548
Lb_HOMCHL002365	0.0062	0.1196	19.2956	0.10458	0.1343	1.2842	0.00357	0.2063	57.7425
Lb_HOMCHL002366	0.02063	0.0663	3.2132	0.08109	0.0978	1.2063	0.02144	0.0742	3.4615
Lb_HOMCHL002380	0.07083	0.1539	2.173	0.00468	0.1977	42.0043	0.00475	0.1977	42.0043
Lb_HOMCHL002381	0.03179	0.0922	2.9013	0.02037	0.0832	4.0839	0.00359	0.1358	37.8387
Lb_HOMCHL002387	0.02978	0.1516	5.0915	0.07082	0.1661	2.3454	0.0069	0.3639	52.7467
Lb_HOMCHL002400	0.10083	0.1852	1.8371	0.07418	0.1507	2.0324	0.00747	0.1813	24.2736
Lb_HOMCHL002401	0.00493	0.1298	26.3202	0.08178	0.1542	1.8858	0.00543	0.2117	38.9814
Lb_HOMCHL002412	0.08016	0.1544	1.9263	0.11666	0.1448	1.2417	0.00558	0.161	28.8775
Lb_HOMCHL002414	0.06783	0.0711	1.0486	0.0385	0.1009	2.6214	0.00504	0.116	23.0222
Lb_HOMCHL002417	0.00683	0.1293	18.9193	0.00954	0.1422	14.9054	0.00531	0.1748	32.9145
Lb_HOMCHL002424	0.10343	0.1495	1.4453	0.03017	0.1515	5.0234	0.00618	0.2401	38.86
Lb_HOMCHL002425	0.00828	0.1418	17.113	0.00527	0.1481	28.0817	0.00515	0.222	43.153
Lb_HOMCHL002428	0.05275	0.0612	1.1595	0.04295	0.0545	1.2692	0.0262	0.1052	4.0165
Lb_HOMCHL002432	0.00772	0.1822	23.5916	0.034	0.2996	8.8102	0.02652	0.2773	10.4559
Lb_HOMCHL002433	0.02316	0.0782	3.3772	0.0035	0.0807	23.0616	0.01139	0.1135	9.9651
Lb_HOMCHL002436	0.05659	0.1457	2.5739	0.04523	0.1379	3.0487	0.00456	0.1773	38.8505
Lb_HOMCHL002441	0.00428	0.1095	25.5755	0.00489	0.1373	28.0623	0.00599	0.2241	37.3829
Lb_HOMCHL002471	0.00759	0.1311	17.2699	0.01248	0.1352	10.8363	0.26445	0.2772	1.0482
Lb_HOMCHL002482	0.00899	0.1542	17.1622	0.06801	0.1442	2.12	0.00659	0.2357	35.7824
Lb_HOMCHL002488	0.04403	0.1042	2.3661	0.00269	0.1377	51.1281	0.0027	0.1377	51.1281
Lb_HOMCHL002489	0.03695	0.0734	1.9873	0.03817	0.0684	1.7906	0.00666	0.0827	12.4311
Lb_HOMCHL002492	0.1305	0.0998	0.7647	0.0024	0.0977	40.778	0.00313	0.1411	45.0551
Lb_HOMCHL002493	0.05889	0.0891	1.5129	0.00331	0.116	35.0434	0.00548	0.1678	30.5996
Lb_HOMCHL002496	0.04819	0.1065	2.2109	0.0287	0.1106	3.8546	0.0037	0.1577	42.6639
Lb_HOMCHL002497	0.00564	0.1034	18.3332	0.04556	0.1462	3.2094	0.00461	0.2646	57.3804
Lb_HOMCHL002498	0.02074	0.0809	3.8998	0.02347	0.0735	3.1298	0.02789	0.1446	5.1841
Lb_HOMCHL002512	0.10937	0.1037	0.9484	0.08324	0.1201	1.4434	0.00301	0.1393	46.2255
Lb_HOMCHL002517	0.03085	0.0992	3.2143	0.03552	0.1068	3.008	0.00601	0.2477	41.2393
Lb_HOMCHL002521	0.00495	0.111	22.433	0.04353	0.1315	3.0214	0.00406	0.1721	42.3356
Lb_HOMCHL002522	0.0072	0.1619	22.4914	0.0286	0.1356	4.7413	0.01195	0.65	54.3764
Lb_HOMCHL002527	0.00576	0.1334	23.1761	0.00577	0.1334	23.1761	0.04279	0.1783	4.1677
Lb_HOMCHL002528	0.04137	0.1187	2.869	0.0171	0.1323	7.7374	0.0036	0.1614	44.872
Lb_HOMCHL002532	0.05974	0.0984	1.6476	0.08541	0.1251	1.465	0.00256	0.0818	32.0178
Lb_HOMCHL002536	0.00426	0.1147	26.9435	0.0034	0.1242	36.5252	0.0041	0.1489	36.3044
Lb_HOMCHL002546	0.12235	0.1175	0.96	0.0715	0.1501	2.0989	0.0626	0.1658	2.6478
Lb_HOMCHL002547	0.01035	0.1781	17.212	0.01068	0.1914	17.9175	0.00735	0.3794	51.6527
Lb_HOMCHL002548	0.0164	0.065	3.9632	0.01642	0.065	3.9632	0.00131	0.0828	63.4245
Lb_HOMCHL002552	0.05928	0.0882	1.488	0.02247	0.0939	4.1798	0.00699	0.2412	34.5082
Lb_HOMCHL002553	0.0908	0.125	1.3768	0.0524	0.1492	2.8473	0.01697	0.2479	14.6036
Lb_HOMCHL002554	0.09854	0.1057	1.0727	0.00345	0.1379	39.9696	0.00416	0.166	39.8934
Lb_HOMCHL002563	0.1012	0.1323	1.3072	0.05719	0.1455	2.5441	0.00465	0.2379	51.1504
Lb_HOMCHL002567	0.006	0.1425	23.7354	0.0074	0.1739	23.519	0.00494	0.2028	41.0867
Lb_HOMCHL002570	0.00588	0.1399	23.7731	0.00661	0.239	36.1548	0.19954	0.2666	1.336
Lb_HOMCHL002574	0.00705	0.1592	22.5857	0.05047	0.1195	2.368	0.00776	0.3438	44.321
Lb_HOMCHL002584	0.00562	0.1333	23.7637	0.00558	0.1333	23.7637	0.00416	0.2662	64.0198
Lb_HOMCHL002595	0.03431	0.0971	2.8296	0.01484	0.1242	8.372	0.00346	0.2206	63.7757
Lb_HOMCHL002602	0.00915	0.1642	17.947	0.00849	0.2234	26.3224	0.00589	0.2876	48.8045
Lb_HOMCHL002606	0.05873	0.1709	2.9094	0.09468	0.1293	1.365	0.0472	0.2046	4.3346
Lb_HOMCHL002613	0.04506	0.0819	1.8177	0.07095	0.0971	1.3689	0.20476	0.172	0.84
Lb_HOMCHL002615	0.0078	0.149	19.1007	0.00581	0.1955	33.6769	0.00488	0.2324	47.6497
Lb_HOMCHL002622	0.00564	0.1461	25.8833	0.00607	0.1583	26.0706	0.00518	0.2393	46.1908
Lb_HOMCHL002623	0.00515	0.1557	30.213	0.09844	0.2044	2.0762	0.00633	0.2147	33.9333
Lb_HOMCHL002627	0.06411	0.1019	1.5897	0.05942	0.1204	2.0265	0.00871	0.1631	18.7119
Lb_HOMCHL002630	0.04844	0.0897	1.8522	0.03922	0.1013	2.5822	0.00397	0.2011	50.6643
Lb_HOMCHL002639	0.04236	0.1496	3.5326	0.06145	0.1157	1.8832	0.00996	0.631	63.3689
Lb_HOMCHL002641	0.00526	0.1503	28.5535	0.01085	0.2472	22.7831	0.00826	0.3162	38.2953
Lb_HOMCHL002642	0.00631	0.124	19.6558	0.06847	0.1595	2.3287	0.00477	0.2161	45.2959
Lb_HOMCHL002650	0.15728	0.1441	0.9159	0.04779	0.1313	2.7473	0.05924	0.3296	5.5627
Lb_HOMCHL002651	0.0337	0.0999	2.9634	0.00257	0.0988	38.476	0.00231	0.1131	48.9673
Lb_HOMCHL002653	0.04247	0.2088	4.9157	0.04405	0.2032	4.6123	0.00942	0.5646	59.9234
Lb_HOMCHL002656	0.00564	0.0904	16.0233	0.02728	0.0853	3.1277	0.00765	0.1137	14.8562
Lb_HOMCHL002657	0.07039	0.1236	1.7557	0.00628	0.1635	26.0491	0.00491	0.3363	68.4963
Lb_HOMCHL002670	0.08462	0.1065	1.2589	0.01612	0.0879	5.4532	0.00672	0.1329	19.769
Lb_HOMCHL002671	0.08944	0.1196	1.3377	0.00363	0.1449	39.9224	0.00627	0.167	26.6301
Lb_HOMCHL002675	0.01049	0.2013	19.198	0.00989	0.1846	18.6652	0.00623	0.2975	47.7365
Lb_HOMCHL002678	0.07614	0.0815	1.0708	0.00305	0.1246	41.0204	0.00304	0.1246	41.0204
Lb_HOMCHL002685	0.00381	0.1136	29.7852	0.00381	0.1136	29.7852	0.00339	0.1703	50.1822
Lb_HOMCHL002690	0.01277	0.1764	13.821	0.04361	0.1765	4.0474	0.00656	0.359	54.7182
Lb_HOMCHL002692	0.00575	0.1354	23.5542	0.043	0.1082	2.5169	0.01823	0.3472	19.0463
Lb_HOMCHL002708	0.00795	0.1476	18.5678	0.07714	0.2349	3.0457	0.00577	0.2724	47.1888
Lb_HOMCHL002719	0.00884	0.1696	19.1905	0.08297	0.176	2.1213	0.00598	0.2928	48.9309
Lb_HOMCHL002732	0.0439	0.0694	1.5813	0.0598	0.0808	1.3513	0.00577	0.1487	25.783
Lb_HOMCHL002734	0.00935	0.161	17.2193	0.02641	0.1273	4.8182	0.0096	0.2914	30.3344
Lb_HOMCHL002735	0.07006	0.1094	1.5611	0.08416	0.1233	1.4656	0.01344	0.1301	9.6839
Lb_HOMCHL002737	0.00618	0.103	16.6726	0.00656	0.1613	24.5961	0.00675	0.198	29.3425
Lb_HOMCHL002741	0.01407	0.1804	12.8278	0.09735	0.2491	2.5584	0.00406	0.0962	23.7144
Lb_HOMCHL002742	0.00768	0.1286	16.7491	0.00503	0.1718	34.1376	0.07046	0.0963	1.3674
Lb_HOMCHL002744	0.00879	0.1862	21.1929	0.02435	0.129	5.299	0.01978	0.1798	9.0913
Lb_HOMCHL002749	0.03891	0.1192	3.0624	0.0622	0.1208	1.9424	0.07185	0.242	3.3686
Lb_HOMCHL002750	0.07526	0.1751	2.3269	0.07266	0.1644	2.2631	0.00679	0.2647	38.9838
Lb_HOMCHL002753	0.00543	0.1359	25.0064	0.00382	0.1213	31.7379	0.00423	0.1447	34.2463
Lb_HOMCHL002755	0.00713	0.1307	18.3308	0.08047	0.1482	1.8415	0.00401	0.1992	49.6397
Lb_HOMCHL002759	0.13093	0.183	1.3979	0.09994	0.1605	1.606	0.00711	0.203	28.5356
Lb_HOMCHL002760	0.14541	0.1414	0.9725	0.08259	0.1552	1.8791	0.04426	0.2705	6.1116
Lb_HOMCHL002762	0.00576	0.1125	19.5301	0.01252	0.1731	13.8222	0.09442	0.1614	1.7095
Lb_HOMCHL002771	0.03747	0.0945	2.5209	0.0031	0.0956	30.8508	0.00197	0.1112	56.5727
Lb_HOMCHL002773	0.00654	0.1283	19.6023	0.0311	0.171	5.4982	0.00453	0.1755	38.7858
Lb_HOMCHL002778	0.01861	0.122	6.5542	0.0148	0.1641	11.0888	0.00649	0.4098	63.1507
Lb_HOMCHL002779	0.03314	0.1075	3.2437	0.05246	0.0993	1.8928	0.00397	0.1338	33.7363
Lb_HOMCHL002784	0.05964	0.1419	2.3793	0.09687	0.1584	1.6351	0.09308	0.3952	4.2455
Lb_HOMCHL002800	0.15082	0.1116	0.7398	0.04721	0.1279	2.709	0.00546	0.2516	46.0328
Lb_HOMCHL002802	0.00823	0.1425	17.3199	0.07883	0.1665	2.1124	0.00519	0.2965	57.135
Lb_HOMCHL002809	0.00542	0.1087	20.0333	0.00373	0.123	33.0129	0.00315	0.1408	44.7366
Lb_HOMCHL002816	0.00584	0.1369	23.4365	0.00438	0.1592	36.3354	0.02939	0.3807	12.9513
Lb_HOMCHL002819	0.00812	0.1822	22.4504	0.10446	0.2567	2.4573	0.0053	0.2486	46.9107
Lb_HOMCHL002824	0.04548	0.1088	2.3927	0.03861	0.1606	4.1604	0.00395	0.2079	52.6327
Lb_HOMCHL002831	0.14882	0.1454	0.9773	0.0627	0.158	2.52	0.03149	0.2017	6.4042
Lb_HOMCHL002834	0.04119	0.0704	1.7092	0.03626	0.0852	2.3492	0.00258	0.1138	44.0577
Lb_HOMCHL002835	0.00506	0.1066	21.0377	0.06224	0.1014	1.6297	0.00294	0.1551	52.7068
Lb_HOMCHL002836	0.00607	0.1148	18.9234	0.02098	0.1429	6.8111	0.00565	0.2297	40.6578
Lb_HOMCHL002838	0.10703	0.0903	0.8439	0.07296	0.1216	1.6663	0.00297	0.1269	42.6543
Lb_HOMCHL002840	0.06914	0.1632	2.3609	0.22051	0.1442	0.6541	0.15291	0.3018	1.9738
Lb_HOMCHL002848	0.0613	0.1221	1.9912	0.02886	0.1467	5.082	0.00475	0.196	41.25
Lb_HOMCHL002849	0.0096	0.0328	3.4222	0.00459	0.0461	10.0293	0.00188	0.028	14.9127
Lb_HOMCHL002861	0.10766	0.1737	1.6135	0.11584	0.2743	2.3678	0.17132	0.552	3.2222
Lb_HOMCHL002870	0.00729	0.1358	18.6302	0.00673	0.1866	27.7309	0.00568	0.1956	34.4627
Lb_HOMCHL002873	0.00703	0.1451	20.629	0.10374	0.1663	1.6035	0.00611	0.2382	39.0153
Lb_HOMCHL002876	0.07029	0.1314	1.8694	0.00709	0.1742	24.5821	0.00573	0.2693	46.9866
Lb_HOMCHL002877	0.09727	0.1205	1.2385	0.06108	0.1512	2.4761	0.00626	0.2751	43.9729
Lb_HOMCHL002878	0.10725	0.0705	0.657	0.04128	0.0738	1.7879	0.00237	0.1077	45.5253
Lb_HOMCHL002883	0.09396	0.1265	1.3469	0.06556	0.1432	2.184	0.06825	0.1621	2.375
Lb_HOMCHL002886	0.00866	0.1636	18.8964	0.07637	0.1491	1.9525	0.00451	0.225	49.8685
Lb_HOMCHL002890	0.19068	0.1225	0.6423	0.04203	0.1346	3.2016	0.00398	0.1854	46.6313
Lb_HOMCHL002892	0.00608	0.1236	20.3333	0.00279	0.1061	38.0627	0.00349	0.191	54.7379
Lb_HOMCHL002894	0.00724	0.15	20.72	0.00514	0.1295	25.2091	0.00353	0.2287	64.8233
Lb_HOMCHL002895	0.04198	0.1143	2.7226	0.04088	0.1381	3.3784	0.0042	0.1909	45.4566
Lb_HOMCHL002897	0.00981	0.1484	15.1245	0.06247	0.1899	3.0393	0.02762	0.5212	18.8735
Lb_HOMCHL002910	0.00589	0.1386	23.54	0.0069	0.1511	21.9058	0.00607	0.3142	51.761
Lb_HOMCHL002919	0.02768	0.1045	3.7755	0.00355	0.1156	32.6192	0.00298	0.1365	45.7416
Lb_HOMCHL002926	0.06226	0.0983	1.5795	0.06626	0.1395	2.1055	0.18864	0.4118	2.1828
Lb_HOMCHL002936	0.03902	0.1349	3.4577	0.03362	0.145	4.3143	0.00521	0.2498	47.9313
Lb_HOMCHL002942	0.00942	0.1238	13.1526	0.00365	0.1524	41.8066	0.01139	0.1507	13.2296
Lb_HOMCHL002950	0.08906	0.173	1.9423	0.08633	0.1679	1.9441	0.01091	0.3684	33.7627
Lb_HOMCHL002955	0.00639	0.1341	20.9733	0.15475	0.2218	1.4332	0.00575	0.2798	48.6639
Lb_HOMCHL002959	0.11197	0.1335	1.1923	0.08234	0.1421	1.726	0.02475	0.1619	6.5402
Lb_HOMCHL002961	0.02837	0.0632	2.2274	0.0229	0.0783	3.4204	0.00215	0.1301	60.4544
Lb_HOMCHL002962	0.00594	0.1509	25.3903	0.0164	0.262	15.9776	0.00879	0.5114	58.2113
Lb_HOMCHL002964	0.04375	0.0886	2.0255	0.03703	0.0926	2.5002	0.00467	0.1501	32.1103
Lb_HOMCHL002969	0.11259	0.1236	1.0983	0.09475	0.1479	1.5604	0.00469	0.1897	40.4119
Lb_HOMCHL002996	0.04039	0.1076	2.6627	0.04003	0.1476	3.6862	0.00894	0.1678	18.7735
Lb_HOMCHL003003	0.00392	0.1069	27.2527	0.00382	0.1367	35.8082	0.00333	0.1673	50.2994
Lb_HOMCHL003026	0.00655	0.1343	20.5079	0.04917	0.2142	4.3571	0.02621	0.174	6.6376
Lb_HOMCHL003039	0.18691	0.1504	0.8045	0.01042	0.26	24.9417	0.00433	0.188	43.4266
Lb_HOMCHL003040	0.00699	0.1258	17.9888	0.00534	0.1689	31.6105	0.00311	0.1366	43.9828
Lb_HOMCHL003041	0.0403	0.136	3.375	0.01807	0.1457	8.0658	0.03929	0.1447	3.6834
Lb_HOMCHL003044	0.0815	0.149	1.8284	0.1207	0.1884	1.5611	0.03359	0.4344	12.9314
Lb_HOMCHL003053	0.09736	0.0798	0.8198	0.00824	0.1035	12.5533	0.00847	0.1171	13.8282
Lb_HOMCHL003060	0.0053	0.1556	29.3694	0.0048	0.2061	42.8881	0.00942	0.5053	53.633
Lb_HOMCHL003064	0.05761	0.0678	1.1766	0.00398	0.0958	24.0777	0.18258	0.1821	0.9973
Lb_HOMCHL003067	0.06442	0.1488	2.3094	0.11016	0.2304	2.0921	0.00757	0.2628	34.7076
Lb_HOMCHL003068	0.04229	0.0919	2.1719	0.00302	0.1086	35.9208	0.00363	0.1611	44.3379
Lb_HOMCHL003070	0.13274	0.1688	1.2713	0.11499	0.2322	2.0193	0.01046	0.6078	58.0872
Lb_HOMCHL003082	0.00761	0.1845	24.2468	0.01014	0.2326	22.9275	0.00512	0.2159	42.1955
Lb_HOMCHL003088	0.06008	0.126	2.0967	0.00478	0.1686	35.2641	0.02383	0.2565	10.7656
Lb_HOMCHL003090	0.07756	0.1026	1.3223	0.04508	0.1371	3.0424	0.02115	0.1557	7.362
Lb_HOMCHL003094	0.00446	0.1109	24.8827	0.04898	0.1278	2.6088	0.00406	0.2274	55.9736
Lb_HOMCHL003105	0.13527	0.1361	1.0062	0.1432	0.203	1.4177	0.06188	0.1964	3.1739
Lb_HOMCHL003109	0.00938	0.1516	16.1687	0.04632	0.1713	3.6986	0.01706	0.2896	16.9734
Lb_HOMCHL003114	0.03921	0.1497	3.8183	0.13324	0.1725	1.2944	0.01715	0.242	14.116
Lb_HOMCHL003116	0.01256	0.1861	14.8122	0.10059	0.2716	2.6999	0.01424	0.2505	17.5857
Lb_HOMCHL003119	0.0563	0.0984	1.7486	0.02947	0.093	3.1549	0.01333	0.233	17.4884
Lb_HOMCHL003135	0.04733	0.1255	2.6526	0.02182	0.1605	7.3545	0.19248	0.2559	1.3293
Lb_HOMCHL003144	0.12419	0.1479	1.1905	0.05532	0.155	2.8018	0.0361	0.2246	6.2218
Lb_HOMCHL003147	0.10958	0.1379	1.2585	0.05565	0.1784	3.2055	0.01249	0.3288	26.3253
Lb_HOMCHL003148	0.00592	0.1294	21.8439	0.04709	0.1309	2.7801	0.03532	0.1482	4.1955
Lb_HOMCHL003167	0.00305	0.0875	28.7151	0.00543	0.159	29.2633	0.00274	0.1293	47.0983
Lb_HOMCHL003173	0.00805	0.1551	19.2509	0.00375	0.1311	35.0026	0.0033	0.1984	60.1314
Lb_HOMCHL003175	0.04335	0.1105	2.5488	0.05022	0.1044	2.0792	0.05232	0.1999	3.8212
Lb_HOMCHL003177	0.01346	0.1342	9.9752	0.00712	0.2284	32.0656	0.61903	0.348	0.5622
Lb_HOMCHL003180	0.00987	0.1744	17.6748	0.03553	0.1628	4.582	0.00673	0.2041	30.3193
Lb_HOMCHL003191	0.00824	0.1766	21.4282	0.0763	0.1941	2.5438	0.1933	0.2786	1.4411
Lb_HOMCHL003204	0.0069	0.1343	19.443	0.0923	0.173	1.8748	0.03006	0.2102	6.9957
Lb_HOMCHL003207	0.03583	0.1215	3.3902	0.04974	0.1419	2.8524	0.06836	0.4731	6.9213
Lb_HOMCHL003211	0.07282	0.1397	1.9186	0.10782	0.1968	1.8255	0.00683	0.3183	46.6262
Lb_HOMCHL003218	0.05821	0.1289	2.2145	0.0468	0.1468	3.1368	0.00529	0.269	50.8896
Lb_HOMCHL003219	0.099	0.1796	1.8137	0.00676	0.2531	37.3819	0.00679	0.2531	37.3819
Lb_HOMCHL003247	0.02884	0.1195	4.143	0.00259	0.1025	39.6438	0.01374	0.1078	7.8392
Lb_HOMCHL003252	0.12331	0.14	1.1355	0.1185	0.1823	1.5384	0.00438	0.1955	44.6171
Lb_HOMCHL003258	0.00474	0.0713	15.0675	0.00344	0.071	20.6546	0.00376	0.117	31.1074
Lb_HOMCHL003269	0.09012	0.1104	1.225	0.041	0.1101	2.6858	0.00784	0.2593	33.0609
Lb_HOMCHL003270	0.00437	0.1152	26.3506	0.04932	0.1484	3.0085	0.0042	0.1936	46.0555
Lb_HOMCHL003271	0.04723	0.0939	1.9885	0.01653	0.0903	5.4608	0.01083	0.1753	16.1759
Lb_HOMCHL003272	0.00782	0.1791	22.8893	0.06875	0.1883	2.7385	0.00551	0.2479	44.9709
Lb_HOMCHL003276	0.00749	0.1363	18.1909	0.00405	0.1315	32.4929	0.00554	0.2742	49.533
Lb_HOMCHL003277	0.00845	0.1636	19.3652	0.0806	0.1614	2.0026	0.01428	0.5444	38.1139
Lb_HOMCHL003306	0.00632	0.1654	26.1678	0.01769	0.1677	9.48	0.00638	0.1654	26.1678
Lb_HOMCHL003307	0.00925	0.1952	21.1135	0.19477	0.3336	1.7127	0.07069	0.5058	7.1548
Lb_HOMCHL003327	0.12119	0.1288	1.0628	0.00344	0.1579	45.9121	0.00629	0.1961	31.1902
Lb_HOMCHL003329	0.03433	0.14	4.0788	0.06414	0.1794	2.7971	0.00463	0.2959	63.8732
Lb_HOMCHL003344	0.00541	0.1221	22.5458	0.00464	0.2872	61.9276	0.00387	0.1857	47.9953
Lb_HOMCHL003351	0.07288	0.1357	1.8615	0.07158	0.264	3.6886	0.00342	0.1906	55.7023
Lb_HOMCHL003352	0.1078	0.1182	1.0962	0.03703	0.12	3.2407	0.00909	0.1739	19.1249
Lb_HOMCHL003364	0.10351	0.1218	1.1763	0.08418	0.1464	1.7397	0.00394	0.2242	56.9198
Lb_HOMCHL003368	0.00714	0.1658	23.2129	0.10999	0.2124	1.9312	0.00602	0.2456	40.7762
Lb_HOMCHL003388	0.07581	0.1434	1.8911	0.05989	0.2538	4.2378	0.10381	0.2918	2.8106
Lb_HOMCHL003391	0.03972	0.123	3.0966	0.00703	0.1649	23.4575	0.00255	0.1481	57.9846
Lb_HOMCHL003395	0.00921	0.1947	21.1455	0.06084	0.2264	3.7218	0.00452	0.2513	55.5564
Lb_HOMCHL003428	0.0583	0.1071	1.8371	0.09069	0.1393	1.5361	0.0047	0.211	44.9084
Lb_HOMCHL003435	0.00749	0.1666	22.2261	0.00776	0.2887	37.2041	0.01964	0.3539	18.0233
Lb_HOMCHL003440	0.00556	0.1295	23.3089	0.00328	0.1169	35.6494	0.00358	0.158	44.0853
Lb_HOMCHL003445	0.00591	0.1393	23.5816	0.00473	0.1275	26.9318	0.0514	0.2005	3.9008
Lb_HOMCHL003470	0.01074	0.1784	16.6141	0.08489	0.3233	3.8079	0.00639	0.3971	62.1271
Lb_HOMCHL003480	0.08235	0.2173	2.6392	0.01113	0.3409	30.637	0.01071	0.7319	68.3156
Lb_HOMCHL003481	0.00757	0.1891	24.9736	0.0088	0.2743	31.1585	0.12295	0.5829	4.7414
Lb_HOMCHL003482	0.00614	0.147	23.958	0.00437	0.1417	32.4588	0.00377	0.261	69.2659
Lb_HOMCHL003494	0.005	0.1195	23.9237	0.02415	0.1136	4.7038	0.00505	0.1195	23.9237
Lb_HOMCHL003501	0.00704	0.1818	25.8195	0.00607	0.3315	54.6235	0.11035	0.4419	4.0047
Lb_HOMCHL003503	0.00783	0.1386	17.7008	0.0067	0.1469	21.9122	0.00767	0.2211	28.811
Lb_HOMCHL003509	0.06948	0.0977	1.4055	0.04265	0.0778	1.8237	0.03006	0.1071	3.5617
Lb_HOMCHL003540	0.00604	0.1545	25.5863	0.00726	0.2354	32.4279	0.00497	0.307	61.7934
Lb_HOMCHL003549	0.00697	0.1541	22.1072	0.00522	0.1831	35.0942	0.02657	0.2423	9.1195
Lb_HOMCHL003559	0.00652	0.1432	21.9718	0.0055	0.158	28.7236	0.01014	0.2124	20.939
Lb_HOMCHL003561	0.16615	0.1405	0.8454	0.00782	0.2181	27.9114	0.00743	0.2365	31.8214
Lb_HOMCHL003570	0.00669	0.1525	22.786	0.06398	0.2576	4.027	0.18267	0.2653	1.4526
Lb_HOMCHL003579	0.00868	0.1789	20.5983	0.16227	0.2797	1.7235	0.00482	0.2335	48.4817
Lb_HOMCHL003585	0.00766	0.1238	16.1732	0.04209	0.1161	2.7584	0.0031	0.1425	45.9458
Lb_HOMCHL003602	0.03411	0.1246	3.6519	0.02504	0.1279	5.1073	0.003	0.1304	43.4397
Lb_HOMCHL003613	0.00682	0.12	17.5974	0.0286	0.1396	4.8808	0.0067	0.2415	36.0517
Lb_HOMCHL003631	0.00869	0.175	20.1272	0.02633	0.1886	7.1635	0.10546	0.2087	1.9795
Lb_HOMCHL003633	0.00862	0.2111	24.4943	0.08966	0.1485	1.6563	0.00594	0.3053	51.3654
Lb_HOMCHL003634	0.00589	0.1225	20.7815	0.06394	0.1422	2.2235	0.01175	0.2193	18.6569
Lb_HOMCHL003647	0.03811	0.1187	3.1146	0.00967	0.1303	13.477	0.00211	0.0866	41.1449
Lb_HOMCHL003651	0.28477	0.1576	0.5534	0.03755	0.2119	5.6437	0.03828	0.923	24.1084
Lb_HOMCHL003655	0.04287	0.0735	1.7133	0.01088	0.0984	9.0419	0.00918	0.3973	43.2655
Lb_HOMCHL003658	0.11124	0.1342	1.2067	0.03996	0.2139	5.3539	0.00603	0.2376	39.3978
Lb_HOMCHL003669	0.08542	0.1667	1.9511	0.0897	0.2063	2.2996	0.00601	0.3147	52.3888
Lb_HOMCHL003691	0.00734	0.1612	21.9704	0.09742	0.1908	1.9588	0.00686	0.4212	61.3953
Lb_HOMCHL003711	0.00601	0.1209	20.1079	0.00498	0.1711	34.3244	0.17847	0.2869	1.6077
Lb_HOMCHL003715	0.01113	0.1918	17.2319	0.06918	0.2395	3.4621	0.00688	0.3288	47.7726
Lb_HOMCHL003749	0.00669	0.163	24.3498	0.11457	0.29	2.5313	0.00699	0.4007	57.3541
Lb_HOMCHL003760	0.04156	0.1494	3.5958	0.04883	0.1604	3.2856	0.00786	0.2137	27.1939
Lb_HOMCHL003764	0.11259	0.1182	1.0496	0.28212	0.1985	0.7036	0.0508	0.1285	2.53
Lb_HOMCHL003794	0.00852	0.1679	19.7101	0.00955	0.2804	29.3738	0.02392	0.2271	9.4934
Lb_HOMCHL003832	0.10433	0.1869	1.7916	0.10482	0.2845	2.7137	0.00733	0.4391	59.873
Lb_HOMCHL003842	0.00873	0.1671	19.1467	0.04692	0.1842	3.9253	0.00738	0.314	42.5618
Lb_HOMCHL003855	0.0055	0.1432	26.0352	0.03768	0.137	3.6351	0.00481	0.2357	48.9959
Lb_HOMCHL003857	0.00819	0.1571	19.1808	0.04066	0.1606	3.9495	0.00383	0.2523	65.9357
Lb_HOMCHL003865	0.12429	0.1583	1.2736	0.08803	0.2137	2.4277	0.00549	0.2372	43.2253
Lb_HOMCHL003866	0.00834	0.1649	19.7776	0.03832	0.1924	5.021	0.0061	0.205	33.6372
Lb_HOMCHL003875	0.05141	0.1536	2.9886	0.02949	0.2538	8.6061	0.21657	0.6809	3.144
Lb_HOMCHL003886	0.0356	0.2264	6.3602	0.00853	0.3599	42.2218	0.00767	0.4985	65.0015
Lb_HOMCHL003915	0.0079	0.1788	22.6234	0.03801	0.2389	6.2848	0.00746	0.4022	53.953
Lb_HOMCHL003922	0.08618	0.1828	2.1214	0.01949	0.1755	9.0039	0.00821	0.5431	66.1351
Lb_HOMCHL003936	0.00945	0.176	18.6289	0.0061	0.2106	34.4978	0.03282	0.2547	7.7624
Lb_HOMCHL003954	0.00561	0.1844	32.8799	0.00342	0.2864	83.6472	0.00638	0.5275	82.6615
Lb_HOMCHL004059	0.06754	0.1757	2.602	0.01093	0.3709	33.9468	0.01215	0.238	19.5856
Lb_HOMCHL004087	0.00868	0.1686	19.411	0.00431	0.1675	38.8295	0.0296	0.3232	10.9178
Lb_HOMCHL004099	0.00778	0.1586	20.3715	0.02807	0.1573	5.6052	0.00474	0.3163	66.7769
Lb_HOMCHL004106	0.01265	0.1893	14.9625	0.00859	0.5053	58.806	0.00555	0.2472	44.5681
Lb_HOMCHL004117	0.00559	0.1451	25.9681	0.00497	0.2771	55.7137	0.00567	0.1451	25.9681
Lb_HOMCHL004179	0.00521	0.1428	27.3958	0.00482	0.1534	31.8278	0.0064	0.3498	54.6145
Lb_HOMCHL004204	0.00608	0.1477	24.2822	0.003	0.1207	40.2211	0.03378	0.541	16.014
Lb_HOMCHL004213	0.03882	0.1727	4.4474	0.28701	0.2572	0.8962	0.10692	0.2272	2.1252
Lb_HOMCHL004261	0.00703	0.1671	23.7781	0.13396	0.1561	1.1652	0.00567	0.2902	51.1837
Lb_HOMCHL004329	0.00987	0.1912	19.3713	0.01757	0.2233	12.7086	0.12928	0.348	2.6924
Lb_HOMCHL004386	0.01062	0.1432	13.4863	0.09369	0.194	2.0711	0.09698	0.3674	3.7882
Lb_HOMCHL004495	0.04225	0.1486	3.5164	0.00617	0.2305	37.3759	0.01027	0.4621	44.9909
Lb_HOMCHL004497	0.0085	0.1895	22.3016	0.00841	0.307	36.5442	0.00836	0.307	36.5442
Lb_HOMCHL004567	0.0114	0.2004	17.5755	0.10414	0.2657	2.5517	0.00969	0.5865	60.536
Lb_HOMCHL004569	0.00976	0.1958	20.0635	0.133	0.1913	1.4381	0.01154	0.255	22.11
Lb_HOMCHL004597	0.0067	0.1821	27.1853	0.10497	0.1465	1.3955	0.00827	0.4275	51.6708
Lb_HOMCHL004687	0.00716	0.1617	22.5832	0.00717	0.1617	22.5832	0.00732	0.3873	52.883
Lb_HOMCHL004722	0.00928	0.1423	15.3316	0.00416	0.1115	26.7825	0.00788	0.2875	36.4847
Lb_HOMCHL004928	0.01258	0.1603	12.7459	0.06085	0.1245	2.0456	0.00438	0.1977	45.1759
Lb_HOMCHL004963	0.17322	0.1156	0.6671	0.08917	0.1663	1.8654	0.00622	0.1885	30.2873
Lb_HOMCHL005051	0.00482	0.1391	28.8603	0.00295	0.1128	38.2844	0.01859	0.2945	15.8424
Lb_HOMCHL005087	0.00713	0.1627	22.8106	0.00746	0.4179	56.0178	0.0083	0.5022	60.5002
Lb_HOMCHL005095	0.04815	0.1272	2.6419	0.08228	0.1447	1.7584	0.00322	0.2364	73.4331
Average	0.0484709	0.118318	8.71147	0.0426918	0.14299	10.4594	0.0205371	0.21307	31.4218
Median	0.03921	0.1179	2.6925	0.03565	0.1356	3.2016	0.00601	0.1909	35.0281
