# Supplementary material for: Genome-wide patterns of selection–drift variation strongly associate with organismal traits across the green plant lineage
Source: Genome Res. 2024 Aug;34(8):1130–9. doi: 10.1101/gr.279002.124 (PMC11444171; doi:10.1101/gr.279002.124)
Supplement: Supplement 18 [file Supplemental_Table_S6.xlsx]

## Sheet: Mixed_02_11
Supplemental Table S6: PAML outputs for body architecture + life cycles combined models[M3]. Lists the dN, dS and dN/dS values of low copy genes of unicellular haploid, multicellular haploid and multicellular haploid-diploid algae.
	Unicellular hapoid			Multicellular haploid			Multicellular Haploid-diploid
Gene	dN/dS	dN	dS	dN/dS	dN	dS	dN/dS	dN	dS
Mx_HOMCHL000439	0.085	0.0376	0.442	0.03373	0.0321	0.9521	0.02742	0.1923	7.014
Mx_HOMCHL000496	0.15921	0.0727	0.4567	0.063	0.0846	1.3422	0.04833	0.0772	1.5978
Mx_HOMCHL000545	0.0595	0.1226	2.0606	0.09632	0.1722	1.7885	0.05374	0.182	3.3866
Mx_HOMCHL000664	0.11261	0.0479	0.4255	0.07698	0.0635	0.8251	0.04796	0.0723	1.5072
Mx_HOMCHL000732	0.0019	0.0518	27.309	0.00841	0.0459	5.4512	0.00213	0.0906	42.467
Mx_HOMCHL000737	0.07057	0.0528	0.7479	0.04927	0.0913	1.8523	0.05716	0.0616	1.0776
Mx_HOMCHL000773	0.03235	0.0743	2.2976	0.06176	0.1698	2.7488	0.00307	0.1106	35.9813
Mx_HOMCHL000781	0.06182	0.029	0.4693	0.0226	0.0347	1.5373	0.0223	0.0314	1.4057
Mx_HOMCHL000789	0.06644	0.0827	1.2441	0.06531	0.1296	1.9841	0.08368	0.2151	2.5701
Mx_HOMCHL000807	0.07413	0.0742	1.0011	0.10096	0.2993	2.9641	0.02911	0.1451	4.9849
Mx_HOMCHL000817	0.01236	0.0472	3.8161	0.0174	0.071	4.0845	0.01484	0.0862	5.8142
Mx_HOMCHL000826	0.16741	0.1026	0.6128	0.06888	0.2114	3.0687	0.05836	0.1334	2.2858
Mx_HOMCHL000844	0.0543	0.0316	0.5816	0.01886	0.0374	1.9845	0.01679	0.0385	2.2939
Mx_HOMCHL000878	0.00405	0.0883	21.7944	0.01207	0.1127	9.3338	0.04982	0.138	2.7697
Mx_HOMCHL000897	0.09957	0.0819	0.8229	0.05818	0.0936	1.6087	0.00611	0.2597	42.484
Mx_HOMCHL000921	0.07292	0.0433	0.5943	0.01248	0.0611	4.8979	0.01555	0.0545	3.5058
Mx_HOMCHL000939	0.00754	0.1262	16.7248	0.00394	0.1624	41.1975	0.04345	0.1745	4.017
Mx_HOMCHL000944	0.1101	0.0417	0.3789	0.03364	0.0748	2.2244	0.03288	0.0712	2.1638
Mx_HOMCHL000952	0.05399	0.0504	0.9341	0.03454	0.0608	1.7615	0.01827	0.078	4.2681
Mx_HOMCHL000959	0.00297	0.0617	20.7766	0.01214	0.1484	12.224	0.03436	0.0908	2.6414
Mx_HOMCHL000962	0.06657	0.0371	0.5573	0.03282	0.0281	0.8573	0.00879	0.049	5.576
Mx_HOMCHL000964	0.02091	0.056	2.6784	0.03005	0.0875	2.9113	0.03036	0.0594	1.956
Mx_HOMCHL000975	0.1872	0.0827	0.4419	0.15356	0.1189	0.7744	0.04181	0.1066	2.5495
Mx_HOMCHL000977	0.0407	0.0347	0.8536	0.04164	0.0611	1.4677	0.02535	0.0339	1.336
Mx_HOMCHL000979	0.07185	0.0477	0.6642	0.03148	0.0792	2.5143	0.02648	0.0631	2.3838
Mx_HOMCHL000982	0.05904	0.0669	1.1339	0.04831	0.1192	2.4667	0.02334	0.0896	3.8418
Mx_HOMCHL000998	0.0599	0.0328	0.5469	0.02682	0.045	1.6795	0.02149	0.0498	2.3168
Mx_HOMCHL001007	0.04949	0.0536	1.0828	0.04651	0.0522	1.1231	0.00847	0.0665	7.8541
Mx_HOMCHL001008	0.08979	0.0898	0.9996	0.08603	0.1167	1.3559	0.04623	0.0974	2.1068
Mx_HOMCHL001026	0.03887	0.0656	1.6867	0.05606	0.089	1.5881	0.05768	0.0894	1.5498
Mx_HOMCHL001040	0.08357	0.0899	1.0754	0.06202	0.1679	2.7078	0.05566	0.1403	2.5207
Mx_HOMCHL001069	0.02758	0.0675	2.4469	0.03456	0.0782	2.2617	0.07616	0.104	1.3653
Mx_HOMCHL001123	0.04532	0.0403	0.8884	0.02506	0.0563	2.2449	0.01721	0.0457	2.6548
Mx_HOMCHL001141	0.0641	0.0647	1.0095	0.07176	0.1065	1.4843	0.02138	0.1022	4.7823
Mx_HOMCHL001147	0.06187	0.0632	1.0214	0.05163	0.0877	1.6991	0.00285	0.0761	26.6692
Mx_HOMCHL001154	0.07944	0.1006	1.267	0.077	0.1103	1.4331	0.04347	0.0936	2.1524
Mx_HOMCHL001160	0.10619	0.0475	0.4469	0.04391	0.1452	3.3066	0.0018	0.0626	34.8542
Mx_HOMCHL001161	0.10328	0.087	0.8426	0.07827	0.1303	1.6644	0.00441	0.1343	30.4683
Mx_HOMCHL001169	0.0046	0.1055	22.9464	0.00526	0.1625	30.9217	0.06523	0.2138	3.2767
Mx_HOMCHL001170	0.18273	0.0838	0.4588	0.0949	0.1133	1.1941	0.00329	0.1	30.3593
Mx_HOMCHL001173	0.01913	0.0925	4.8357	0.08178	0.1093	1.3361	0.06401	0.1246	1.9475
Mx_HOMCHL001175	0.05221	0.3165	6.061	0.01832	0.1527	8.3381	0.04119	0.1174	2.8493
Mx_HOMCHL001177	0.07169	0.0877	1.2234	0.087	0.1495	1.7188	0.05378	0.1777	3.3045
Mx_HOMCHL001182	0.03251	0.0813	2.5013	0.05271	0.1656	3.1423	0.03555	0.0978	2.7525
Mx_HOMCHL001203	0.00386	0.0719	18.6153	0.02201	0.3357	15.2498	0.03122	0.0811	2.5997
Mx_HOMCHL001205	0.05738	0.0294	0.5131	0.01768	0.0299	1.6917	0.01939	0.0413	2.1308
Mx_HOMCHL001216	0.02664	0.0513	1.9244	0.01652	0.059	3.5737	0.00208	0.0811	39.0167
Mx_HOMCHL001217	0.02393	0.0656	2.7435	0.0375	0.0696	1.8568	0.02711	0.1004	3.7051
Mx_HOMCHL001230	0.02258	0.0708	3.1375	0.05369	0.084	1.5655	0.01151	0.1039	9.0265
Mx_HOMCHL001240	0.0679	0.1504	2.2151	0.10758	0.2172	2.0194	0.00523	0.1878	35.8902
Mx_HOMCHL001242	0.05756	0.0533	0.9263	0.03241	0.0594	1.8339	0.02313	0.0699	3.0201
Mx_HOMCHL001248	0.00486	0.1101	22.6252	0.01055	0.2184	20.6883	0.12364	0.1601	1.2947
Mx_HOMCHL001253	0.10472	0.0808	0.7717	0.06439	0.1436	2.2298	0.04601	0.1032	2.2423
Mx_HOMCHL001258	0.13532	0.1027	0.7593	0.12222	0.1685	1.3785	0.03851	0.1689	4.3868
Mx_HOMCHL001261	0.00281	0.0577	20.5549	0.01059	0.1974	18.6276	0.06801	0.0992	1.4591
Mx_HOMCHL001265	0.00337	0.083	24.6326	0.00496	0.1394	28.0914	0.06558	0.1326	2.0225
Mx_HOMCHL001273	0.10635	0.0597	0.561	0.07202	0.0655	0.9098	0.00323	0.0885	27.3472
Mx_HOMCHL001274	0.03297	0.0393	1.1901	0.05228	0.0667	1.2764	0.02831	0.0558	1.9721
Mx_HOMCHL001278	0.02643	0.0365	1.381	0.02607	0.0401	1.5375	0.03342	0.0397	1.1894
Mx_HOMCHL001285	0.12457	0.0917	0.7363	0.0445	0.1425	3.2027	0.0624	0.1391	2.2287
Mx_HOMCHL001287	0.04527	0.0857	1.893	0.00973	0.2098	21.5505	0.02457	0.084	3.4183
Mx_HOMCHL001292	0.00306	0.1079	36.5213	0.00567	0.1705	30.0493	0.00296	0.1079	36.5213
Mx_HOMCHL001293	0.00399	0.0976	24.4328	0.0042	0.162	38.5893	0.06949	0.1591	2.2904
Mx_HOMCHL001305	0.05396	0.1593	2.9513	0.09402	0.1624	1.7277	0.05841	0.1763	3.0178
Mx_HOMCHL001327	0.04411	0.0667	1.5126	0.10426	0.1283	1.2302	0.08535	0.1168	1.3681
Mx_HOMCHL001339	0.00475	0.074	15.575	0.01627	0.2014	12.384	0.04419	0.1209	2.7353
Mx_HOMCHL001344	0.0737	0.0743	1.0082	0.03737	0.1231	3.2957	0.02803	0.1279	4.5638
Mx_HOMCHL001356	0.01002	0.1108	11.0617	0.00645	0.1497	23.2268	0.0749	0.1279	1.7082
Mx_HOMCHL001359	0.01598	0.0613	3.8335	0.03389	0.096	2.8334	0.01981	0.0819	4.1326
Mx_HOMCHL001361	0.0054	0.1634	30.2382	0.0057	0.2022	35.4498	0.0276	0.1503	5.446
Mx_HOMCHL001362	0.00351	0.0713	20.3341	0.00275	0.0777	28.2485	0.05772	0.0848	1.4701
Mx_HOMCHL001367	0.05493	0.0367	0.6681	0.01682	0.1763	10.4802	0.00365	0.071	19.4415
Mx_HOMCHL001369	0.01699	0.0698	4.1094	0.01437	0.0968	6.7356	0.02372	0.0982	4.1428
Mx_HOMCHL001370	0.03851	0.0706	1.8323	0.04176	0.2232	5.3438	0.07366	0.1151	1.5628
Mx_HOMCHL001372	0.00386	0.0931	24.1338	0.00268	0.0887	33.0423	0.00326	0.1227	37.6663
Mx_HOMCHL001374	0.00408	0.1037	25.3923	0.00314	0.128	40.7337	0.06902	0.1246	1.8052
Mx_HOMCHL001387	0.02861	0.0862	3.0123	0.06069	0.1033	1.7025	0.03205	0.1059	3.3038
Mx_HOMCHL001395	0.07312	0.1061	1.4511	0.15687	0.13	0.8286	0.08873	0.1626	1.8318
Mx_HOMCHL001409	0.06333	0.055	0.868	0.04849	0.1124	2.3178	0.07445	0.0915	1.2294
Mx_HOMCHL001412	0.06845	0.0925	1.3506	0.11612	0.151	1.3005	0.08722	0.1475	1.691
Mx_HOMCHL001414	0.09447	0.068	0.7195	0.04902	0.1056	2.1539	0.01944	0.1029	5.2937
Mx_HOMCHL001415	0.0252	0.0885	3.5101	0.0703	0.1354	1.9264	0.04887	0.1444	2.955
Mx_HOMCHL001427	0.00468	0.1154	24.6503	0.0049	0.1668	34.0529	0.00771	0.1988	25.7837
Mx_HOMCHL001433	0.06517	0.1515	2.3246	0.11751	0.1547	1.3165	0.07609	0.1569	2.0617
Mx_HOMCHL001434	0.06182	0.0836	1.3517	0.06619	0.1232	1.8622	0.0406	0.2281	5.6182
Mx_HOMCHL001438	0.01351	0.0704	5.208	0.08307	0.1304	1.5698	0.02777	0.0917	3.3018
Mx_HOMCHL001443	0.02732	0.0495	1.8106	0.04851	0.0915	1.886	0.02921	0.0788	2.6966
Mx_HOMCHL001445	0.09665	0.0859	0.8882	0.06033	0.123	2.0391	0.04862	0.1333	2.7406
Mx_HOMCHL001446	0.06836	0.1206	1.7646	0.05417	0.1334	2.462	0.00539	0.2001	37.1038
Mx_HOMCHL001451	0.00359	0.0798	22.2526	0.1056	0.0803	0.7609	0.0413	0.0929	2.2498
Mx_HOMCHL001460	0.00491	0.0978	19.9068	0.00267	0.1118	41.8359	0.04674	0.1598	3.4188
Mx_HOMCHL001467	0.01051	0.0687	6.5383	0.01177	0.0869	7.3852	0.07953	0.1157	1.4545
Mx_HOMCHL001471	0.12165	0.1097	0.9018	0.08223	0.148	1.7996	0.10668	0.1703	1.5967
Mx_HOMCHL001474	0.0055	0.0788	14.3358	0.00308	0.0911	29.5742	0.08033	0.145	1.8053
Mx_HOMCHL001481	0.05158	0.1081	2.0961	0.05367	0.1897	3.534	0.04688	0.1805	3.8501
Mx_HOMCHL001484	0.04715	0.0677	1.4362	0.04013	0.0771	1.9227	0.03477	0.0967	2.7814
Mx_HOMCHL001498	0.02112	0.0733	3.4693	0.01232	0.106	8.6034	0.03832	0.134	3.4962
Mx_HOMCHL001505	0.12754	0.076	0.5959	0.07425	0.0703	0.9473	0.01693	0.1028	6.0706
Mx_HOMCHL001506	0.09097	0.0536	0.5896	0.07143	0.0819	1.147	0.06418	0.1064	1.6581
Mx_HOMCHL001512	0.01598	0.07	4.3789	0.04758	0.1016	2.1368	0.02864	0.0712	2.4855
Mx_HOMCHL001517	0.15058	0.141	0.9366	0.14201	0.1222	0.8602	0.0378	0.1475	3.9014
Mx_HOMCHL001526	0.04982	0.08	1.6053	0.06023	0.1655	2.7478	0.0388	0.1177	3.0337
Mx_HOMCHL001536	0.02346	0.0705	3.0056	0.02728	0.0755	2.769	0.04755	0.0828	1.7407
Mx_HOMCHL001539	0.07638	0.0609	0.7977	0.03305	0.1175	3.5548	0.00874	0.1266	14.4885
Mx_HOMCHL001550	0.0666	0.0548	0.8223	0.06272	0.075	1.1954	0.03942	0.0906	2.2978
Mx_HOMCHL001552	0.0536	0.1147	2.1407	0.11935	0.1672	1.4013	0.07696	0.2067	2.6854
Mx_HOMCHL001556	0.18719	0.1343	0.7172	0.11729	0.1518	1.2944	0.06321	0.1738	2.7493
Mx_HOMCHL001560	0.13944	0.1101	0.7892	0.10286	0.3487	3.3901	0.00419	0.1158	27.6173
Mx_HOMCHL001563	0.10132	0.1147	1.1322	0.12513	0.1956	1.5631	0.11169	0.1409	1.2616
Mx_HOMCHL001574	0.00398	0.0715	17.9617	0.01655	0.1797	10.8584	0.00709	0.1109	15.6567
Mx_HOMCHL001575	0.1005	0.0761	0.7577	0.04436	0.1161	2.6159	0.02079	0.1196	5.7514
Mx_HOMCHL001577	0.00455	0.1143	25.1313	0.0032	0.1161	36.2702	0.01615	0.1717	10.6348
Mx_HOMCHL001591	0.01859	0.068	3.6598	0.06896	0.104	1.5088	0.07382	0.105	1.4221
Mx_HOMCHL001601	0.01934	0.0567	2.9333	0.03115	0.0944	3.0322	0.02426	0.1204	4.9628
Mx_HOMCHL001610	0.09917	0.0767	0.7735	0.05239	0.1076	2.0545	0.08407	0.1072	1.2756
Mx_HOMCHL001616	0.00407	0.0979	24.0538	0.01233	0.1394	11.3015	0.02912	0.1265	4.344
Mx_HOMCHL001619	0.07588	0.1017	1.341	0.08943	0.2304	2.5765	0.06848	0.1819	2.6559
Mx_HOMCHL001622	0.00405	0.0864	21.344	0.00543	0.22	40.5241	0.12853	0.1134	0.8825
Mx_HOMCHL001625	0.00458	0.105	22.9304	0.08155	0.1123	1.3774	0.03687	0.1912	5.1863
Mx_HOMCHL001629	0.0444	0.0919	2.0702	0.12939	0.1506	1.1639	0.10623	0.1186	1.1167
Mx_HOMCHL001630	0.08524	0.0465	0.5454	0.04653	0.0646	1.3895	0.02872	0.0604	2.1038
Mx_HOMCHL001633	0.01592	0.0626	3.9343	0.07545	0.0742	0.983	0.02823	0.2442	8.6507
Mx_HOMCHL001637	0.05154	0.041	0.795	0.03346	0.0874	2.6117	0.01878	0.1216	6.4738
Mx_HOMCHL001640	0.12787	0.102	0.798	0.05675	0.1454	2.5616	0.06177	0.1392	2.2532
Mx_HOMCHL001643	0.04003	0.0764	1.9082	0.03047	0.0747	2.452	0.01034	0.1352	13.0783
Mx_HOMCHL001652	0.00365	0.0902	24.721	0.00442	0.1431	32.4133	0.00491	0.1204	24.5244
Mx_HOMCHL001655	0.09657	0.1371	1.4193	0.13727	0.2806	2.0442	0.04831	0.1878	3.8881
Mx_HOMCHL001662	0.00451	0.0985	21.8502	0.00604	0.1675	27.7476	0.07523	0.1944	2.5842
Mx_HOMCHL001664	0.02888	0.1695	5.8675	0.08486	0.124	1.461	0.04701	0.0999	2.1245
Mx_HOMCHL001668	0.00406	0.0967	23.8106	0.00423	0.1426	33.749	0.06675	0.1272	1.9058
Mx_HOMCHL001671	0.04357	0.1537	3.528	0.08519	0.1511	1.7733	0.04803	0.1528	3.181
Mx_HOMCHL001672	0.0327	0.0962	2.9432	0.08007	0.2318	2.8952	0.03698	0.2165	5.8552
Mx_HOMCHL001674	0.00324	0.0949	29.2993	0.01101	0.2306	20.9349	0.00463	0.1635	35.2832
Mx_HOMCHL001678	0.0322	0.1147	3.5613	0.01252	0.2393	19.1158	0.118	0.1726	1.4625
Mx_HOMCHL001687	0.00223	0.0549	24.5998	0.00167	0.0571	34.2335	0.00593	0.1033	17.4323
Mx_HOMCHL001689	0.06478	0.0757	1.1689	0.05753	0.1192	2.0727	0.0494	0.092	1.863
Mx_HOMCHL001690	0.10426	0.0811	0.7781	0.00641	0.2248	35.0876	0.00475	0.1131	23.8188
Mx_HOMCHL001706	0.03178	0.0618	1.9442	0.0455	0.0763	1.677	0.02805	0.0749	2.6704
Mx_HOMCHL001716	0.00628	0.2032	32.5879	0.00624	0.2032	32.5879	0.00647	0.1803	27.874
Mx_HOMCHL001722	0.03582	0.0551	1.5372	0.03073	0.0722	2.3478	0.0408	0.1031	2.5269
Mx_HOMCHL001725	0.0676	0.0601	0.8883	0.03933	0.0881	2.2403	0.05164	0.1078	2.0867
Mx_HOMCHL001726	0.00453	0.1053	23.2753	0.00422	0.1542	36.5478	0.07647	0.1525	1.9937
Mx_HOMCHL001727	0.09885	0.0885	0.8947	0.08829	0.1363	1.5432	0.00554	0.1379	24.91
Mx_HOMCHL001734	0.0282	0.0733	2.5988	0.02882	0.0714	2.4777	0.03173	0.0972	3.0655
Mx_HOMCHL001735	0.02075	0.0568	2.735	0.03907	0.1799	4.6045	0.00427	0.0981	22.9394
Mx_HOMCHL001742	0.00247	0.0719	29.0423	0.01362	0.187	13.7355	0.00366	0.0817	22.3448
Mx_HOMCHL001751	0.09558	0.0478	0.5001	0.03993	0.0597	1.4959	0.02432	0.0668	2.7477
Mx_HOMCHL001754	0.04103	0.096	2.3387	0.0641	0.128	1.997	0.00476	0.1363	28.6546
Mx_HOMCHL001758	0.06913	0.111	1.6054	0.08413	0.2302	2.7361	0.10818	0.1675	1.5483
Mx_HOMCHL001762	0.01413	0.0711	5.0299	0.12423	0.1462	1.1771	0.00355	0.1345	37.9019
Mx_HOMCHL001770	0.00878	0.0914	10.4054	0.02202	0.0747	3.3942	0.01078	0.1169	10.8444
Mx_HOMCHL001781	0.00426	0.0757	17.7689	0.04165	0.2107	5.0605	0.05524	0.085	1.539
Mx_HOMCHL001782	0.00295	0.0827	28.0588	0.00665	0.131	19.7052	0.02654	0.1016	3.8277
Mx_HOMCHL001790	0.0214	0.0741	3.4642	0.09377	0.1284	1.3686	0.00477	0.1144	23.999
Mx_HOMCHL001791	0.05042	0.1149	2.2783	0.10942	0.2149	1.9641	0.08582	0.1972	2.2979
Mx_HOMCHL001793	0.00292	0.0877	30.048	0.00472	0.1324	28.0722	0.11775	0.1472	1.2498
Mx_HOMCHL001805	0.07395	0.0768	1.0386	0.06243	0.1186	1.8998	0.07121	0.0937	1.3156
Mx_HOMCHL001808	0.08944	0.0535	0.5983	0.05746	0.0871	1.5152	0.06554	0.0784	1.1958
Mx_HOMCHL001813	0.00203	0.0511	25.151	0.01015	0.0642	6.3306	0.024	0.086	3.5833
Mx_HOMCHL001817	0.00234	0.0753	32.2599	0.00233	0.0753	32.2599	0.06637	0.0981	1.4782
Mx_HOMCHL001819	0.0846	0.0779	0.9204	0.07118	0.1255	1.7626	0.086	0.1112	1.2931
Mx_HOMCHL001824	0.00437	0.0993	22.7121	0.00447	0.0993	22.7121	0.00631	0.1274	20.1745
Mx_HOMCHL001829	0.00253	0.0583	23.0558	0.03011	0.0516	1.7134	0.02919	0.0845	2.8945
Mx_HOMCHL001836	0.03406	0.0981	2.8813	0.03671	0.0769	2.0948	0.00418	0.1245	29.8174
Mx_HOMCHL001843	0.02841	0.0865	3.0442	0.06019	0.1162	1.9301	0.06145	0.131	2.1319
Mx_HOMCHL001844	0.00921	0.1432	15.5356	0.00469	0.1332	28.3972	0.08059	0.1604	1.9904
Mx_HOMCHL001855	0.11986	0.0874	0.729	0.04828	0.1527	3.1635	0.00704	0.1411	20.0405
Mx_HOMCHL001861	0.03503	0.0814	2.3251	0.04713	0.1197	2.5405	0.01841	0.1059	5.7527
Mx_HOMCHL001863	0.09856	0.0813	0.8254	0.05055	0.14	2.7698	0.06322	0.152	2.4034
Mx_HOMCHL001865	0.00447	0.1144	25.5765	0.12184	0.1832	1.5034	0.05	0.1215	2.4298
Mx_HOMCHL001867	0.06349	0.0766	1.2064	0.0448	0.0823	1.8362	0.021	0.0878	4.1809
Mx_HOMCHL001875	0.0028	0.0647	23.085	0.00313	0.0967	30.8671	0.00633	0.1369	21.6185
Mx_HOMCHL001877	0.06383	0.1486	2.3286	0.05306	0.1648	3.1052	0.08011	0.1496	1.8677
Mx_HOMCHL001882	0.03606	0.0859	2.3828	0.04209	0.1296	3.0785	0.06727	0.1283	1.9069
Mx_HOMCHL001884	0.00334	0.0718	21.4913	0.01044	0.0822	7.8686	0.06606	0.1174	1.7771
Mx_HOMCHL001885	0.07907	0.1229	1.554	0.05598	0.125	2.2332	0.0583	0.1576	2.7033
Mx_HOMCHL001890	0.03889	0.1144	2.9416	0.08957	0.1142	1.2745	0.07782	0.1165	1.4969
Mx_HOMCHL001893	0.06225	0.0791	1.2706	0.06112	0.1052	1.7218	0.04018	0.101	2.5148
Mx_HOMCHL001895	0.00534	0.1439	26.9334	0.008	0.2701	33.7403	0.07615	0.1815	2.3829
Mx_HOMCHL001896	0.05128	0.1205	2.3497	0.05714	0.1164	2.0365	0.03366	0.1411	4.191
Mx_HOMCHL001897	0.00794	0.0712	8.9631	0.01315	0.084	6.3892	0.00346	0.0829	23.9456
Mx_HOMCHL001899	0.00574	0.1843	32.0849	0.01495	0.3673	24.5627	0.12341	0.2061	1.6698
Mx_HOMCHL001905	0.00365	0.1129	30.9041	0.05593	0.1892	3.3821	0.08179	0.1612	1.9713
Mx_HOMCHL001907	0.08289	0.0576	0.6955	0.05872	0.0809	1.3775	0.03537	0.0655	1.8512
Mx_HOMCHL001909	0.01703	0.0842	4.9403	0.03774	0.0949	2.5149	0.04941	0.1313	2.6568
Mx_HOMCHL001912	0.02452	0.0539	2.1971	0.04542	0.071	1.5628	0.02179	0.0791	3.632
Mx_HOMCHL001914	0.04699	0.1189	2.531	0.0616	0.1287	2.0899	0.06444	0.1385	2.149
Mx_HOMCHL001915	0.06646	0.0992	1.4927	0.10668	0.1652	1.5487	0.04855	0.151	3.1108
Mx_HOMCHL001917	0.03214	0.0879	2.7348	0.04267	0.1247	2.9221	0.00379	0.1342	35.3884
Mx_HOMCHL001946	0.0317	0.1382	4.3587	0.04736	0.1957	4.131	0.1241	0.2054	1.6553
Mx_HOMCHL001948	0.05517	0.0271	0.4912	0.02191	0.0351	1.6006	0.02657	0.0329	1.2377
Mx_HOMCHL001955	0.04702	0.0621	1.3202	0.03777	0.0566	1.4975	0.04053	0.0815	2.0094
Mx_HOMCHL001956	0.06746	0.0831	1.2324	0.07551	0.156	2.0662	0.04178	0.1283	3.0716
Mx_HOMCHL001959	0.14758	0.0937	0.635	0.06029	0.1017	1.6876	0.03292	0.2175	6.6047
Mx_HOMCHL001965	0.00719	0.0991	13.781	0.00296	0.1179	39.8599	0.00964	0.1603	16.6354
Mx_HOMCHL001972	0.00556	0.1066	19.1683	0.00284	0.1063	37.4761	0.06368	0.1511	2.3736
Mx_HOMCHL001981	0.01537	0.1092	7.109	0.00976	0.2298	23.5561	0.06978	0.1756	2.5162
Mx_HOMCHL001985	0.03472	0.0795	2.291	0.10311	0.1047	1.0158	0.09608	0.1041	1.0833
Mx_HOMCHL001988	0.00461	0.1091	23.6609	0.1231	0.1432	1.1636	0.00586	0.1482	25.3034
Mx_HOMCHL001995	0.03421	0.0792	2.3148	0.04252	0.1207	2.8385	0.04516	0.1164	2.5775
Mx_HOMCHL002007	0.10332	0.0884	0.856	0.09167	0.0904	0.986	0.06394	0.1124	1.7572
Mx_HOMCHL002011	0.04128	0.0688	1.6659	0.02072	0.0975	4.702	0.04158	0.1138	2.738
Mx_HOMCHL002021	0.00616	0.1507	24.4804	0.00987	0.177	17.939	0.11326	0.1567	1.384
Mx_HOMCHL002024	0.0729	0.0781	1.0719	0.04596	0.0556	1.2093	0.05026	0.1241	2.4687
Mx_HOMCHL002025	0.10273	0.0648	0.6304	0.09279	0.1226	1.3216	0.00299	0.1067	35.6442
Mx_HOMCHL002033	0.00824	0.148	17.9579	0.0071	0.2369	33.3558	0.03089	0.3417	11.064
Mx_HOMCHL002040	0.09539	0.2013	2.1103	0.17465	0.1862	1.0664	0.15345	0.1832	1.194
Mx_HOMCHL002041	0.04046	0.0794	1.9634	0.04578	0.0843	1.8402	0.01457	0.0803	5.5121
Mx_HOMCHL002048	0.00497	0.1151	23.1316	0.00667	0.1668	25.0056	0.00413	0.1273	30.8026
Mx_HOMCHL002051	0.03906	0.1377	3.5264	0.07442	0.1817	2.4413	0.08384	0.1675	1.9979
Mx_HOMCHL002053	0.00543	0.1321	24.3436	0.00585	0.1665	28.4466	0.00423	0.1693	40.0594
Mx_HOMCHL002062	0.06828	0.0635	0.9297	0.05491	0.1173	2.137	0.03044	0.0757	2.486
Mx_HOMCHL002074	0.06896	0.1151	1.6691	0.07446	0.1369	1.8388	0.05529	0.1337	2.4187
Mx_HOMCHL002097	0.0057	0.065	11.3992	0.02028	0.1045	5.153	0.0298	0.1184	3.9738
Mx_HOMCHL002099	0.13088	0.1293	0.988	0.10828	0.2705	2.4982	0.06696	0.1822	2.7208
Mx_HOMCHL002103	0.01579	0.0963	6.0963	0.07474	0.1109	1.4836	0.05841	0.087	1.4898
Mx_HOMCHL002112	0.00526	0.1255	23.841	0.04813	0.1139	2.3663	0.03115	0.1613	5.1788
Mx_HOMCHL002113	0.00427	0.1163	27.238	0.05434	0.133	2.4487	0.07934	0.1464	1.8457
Mx_HOMCHL002115	0.05907	0.1207	2.0428	0.06656	0.1538	2.3098	0.00715	0.1511	21.1408
Mx_HOMCHL002129	0.12016	0.0507	0.4217	0.04407	0.1726	3.9172	0.02032	0.0811	3.9921
Mx_HOMCHL002131	0.0637	0.0651	1.0213	0.04338	0.1006	2.3195	0.02847	0.0823	2.8911
Mx_HOMCHL002132	0.06777	0.0901	1.3296	0.12675	0.1626	1.2824	0.08393	0.163	1.9417
Mx_HOMCHL002134	0.05597	0.1102	1.9684	0.08405	0.1298	1.5446	0.05751	0.1437	2.4991
Mx_HOMCHL002148	0.0084	0.0546	6.5049	0.01466	0.0577	3.936	0.0192	0.0309	1.6105
Mx_HOMCHL002150	0.00312	0.1074	34.4402	0.00499	0.1606	32.1989	0.00784	0.1468	18.7193
Mx_HOMCHL002174	0.00953	0.0367	3.857	0.00748	0.049	6.5589	0.0138	0.0556	4.0263
Mx_HOMCHL002176	0.00587	0.0811	13.8082	0.06364	0.1031	1.6204	0.04384	0.106	2.4171
Mx_HOMCHL002181	0.08634	0.107	1.2396	0.07979	0.1115	1.398	0.04783	0.121	2.5302
Mx_HOMCHL002186	0.0286	0.1008	3.5243	0.07468	0.1404	1.8794	0.08583	0.1794	2.0903
Mx_HOMCHL002189	0.04085	0.0929	2.2737	0.02045	0.057	2.7853	0.01424	0.0699	4.9084
Mx_HOMCHL002190	0.00771	0.0902	11.6943	0.01804	0.1331	7.3812	0.04158	0.091	2.1874
Mx_HOMCHL002193	0.01726	0.1317	7.628	0.02186	0.2406	11.0095	0.05577	0.1457	2.6124
Mx_HOMCHL002195	0.09536	0.1202	1.2608	0.14909	0.1906	1.2781	0.08092	0.1506	1.8613
Mx_HOMCHL002199	0.03922	0.0673	1.7163	0.05071	0.2053	4.0487	0.04392	0.0844	1.921
Mx_HOMCHL002200	0.05461	0.1084	1.9849	0.04118	0.1288	3.1281	0.0909	0.1167	1.2832
Mx_HOMCHL002201	0.08426	0.0784	0.93	0.04384	0.1113	2.5395	0.03234	0.1297	4.0118
Mx_HOMCHL002204	0.01017	0.0528	5.189	0.0183	0.0436	2.3828	0.0033	0.0896	27.1335
Mx_HOMCHL002217	0.04403	0.1302	2.9569	0.07695	0.1568	2.037	0.06929	0.139	2.0055
Mx_HOMCHL002226	0.04368	0.0992	2.27	0.04653	0.1501	3.225	0.05918	0.2664	4.5017
Mx_HOMCHL002228	0.03399	0.1052	3.0958	0.04392	0.1499	3.4136	0.02364	0.1233	5.213
Mx_HOMCHL002232	0.01657	0.0553	3.3394	0.04519	0.0845	1.8697	0.0321	0.0663	2.0657
Mx_HOMCHL002236	0.04028	0.0821	2.0381	0.09707	0.2347	2.418	0.02331	0.1305	5.5979
Mx_HOMCHL002237	0.11028	0.1459	1.3227	0.18085	0.1747	0.9659	0.09387	0.2382	2.5377
Mx_HOMCHL002240	0.00588	0.1412	23.9974	0.00734	0.2124	28.914	0.03741	0.1721	4.6015
Mx_HOMCHL002248	0.00314	0.0941	29.9414	0.00422	0.1501	35.5952	0.00639	0.1643	25.6973
Mx_HOMCHL002254	0.02917	0.0612	2.0986	0.02644	0.0771	2.9164	0.0404	0.0656	1.6242
Mx_HOMCHL002257	0.00203	0.0665	32.7208	0.00355	0.1244	35.0431	0.02919	0.1086	3.7222
Mx_HOMCHL002260	0.02203	0.0673	3.0523	0.02645	0.0841	3.1815	0.02846	0.0814	2.8606
Mx_HOMCHL002261	0.0487	0.0484	0.9937	0.02242	0.0622	2.7731	0.00658	0.0841	12.7832
Mx_HOMCHL002263	0.02708	0.0555	2.0478	0.05066	0.0871	1.7183	0.008	0.0685	8.5553
Mx_HOMCHL002264	0.00761	0.1433	18.8379	0.00686	0.197	28.719	0.06907	0.1822	2.6376
Mx_HOMCHL002267	0.01165	0.0796	6.8346	0.02349	0.1137	4.8408	0.02913	0.1077	3.6979
Mx_HOMCHL002271	0.00557	0.1371	24.6164	0.11609	0.4268	3.6758	0.01123	0.2042	18.1858
Mx_HOMCHL002272	0.06367	0.0891	1.4002	0.06977	0.1011	1.4483	0.04294	0.2902	6.7582
Mx_HOMCHL002277	0.04666	0.0817	1.7511	0.07479	0.146	1.952	0.09934	0.1176	1.1832
Mx_HOMCHL002278	0.15578	0.1126	0.7227	0.082	0.2271	2.7691	0.00314	0.1473	46.8383
Mx_HOMCHL002280	0.05422	0.1254	2.3126	0.08273	0.1397	1.6886	0.03885	0.1439	3.7035
Mx_HOMCHL002286	0.05245	0.0694	1.3239	0.02862	0.0664	2.3221	0.02796	0.0779	2.7853
Mx_HOMCHL002288	0.11798	0.0545	0.4616	0.0467	0.0903	1.9337	0.03553	0.0822	2.3131
Mx_HOMCHL002293	0.10086	0.0901	0.8932	0.13142	0.1492	1.1351	0.00504	0.1431	28.4017
Mx_HOMCHL002303	0.04126	0.0926	2.2438	0.05541	0.1269	2.2907	0.03112	0.1392	4.471
Mx_HOMCHL002305	0.00355	0.1163	32.7725	0.00917	0.2197	23.9471	0.00671	0.1541	22.9843
Mx_HOMCHL002306	0.00238	0.0692	29.0515	0.00312	0.0759	24.365	0.01852	0.0756	4.0834
Mx_HOMCHL002310	0.00412	0.1183	28.7346	0.00382	0.1258	32.8939	0.04986	0.1432	2.8721
Mx_HOMCHL002313	0.0031	0.0866	27.9032	0.00339	0.1414	41.7381	0.00594	0.1428	24.0179
Mx_HOMCHL002317	0.04639	0.0849	1.8302	0.05832	0.1216	2.085	0.00299	0.1094	36.544
Mx_HOMCHL002324	0.0244	0.0829	3.3982	0.01836	0.0962	5.2397	0.10205	0.0965	0.9458
Mx_HOMCHL002327	0.004	0.1045	26.1107	0.00521	0.1337	25.6467	0.00513	0.1561	30.4288
Mx_HOMCHL002338	0.05276	0.1298	2.4602	0.08021	0.1176	1.4657	0.03154	0.1337	4.238
Mx_HOMCHL002340	0.09393	0.1165	1.2402	0.12397	0.1851	1.493	0.04074	0.1555	3.8173
Mx_HOMCHL002347	0.03992	0.0935	2.3434	0.02868	0.1169	4.074	0.03962	0.1083	2.7342
Mx_HOMCHL002361	0.0999	0.0734	0.7351	0.11946	0.175	1.465	0.00491	0.1619	32.9806
Mx_HOMCHL002363	0.00415	0.0793	19.1008	0.05805	0.0883	1.5215	0.04024	0.1445	3.5919
Mx_HOMCHL002365	0.00431	0.0864	20.0584	0.00635	0.2051	32.3029	0.08673	0.1341	1.5457
Mx_HOMCHL002366	0.03621	0.0585	1.6144	0.02566	0.0943	3.6744	0.05788	0.0934	1.6137
Mx_HOMCHL002380	0.01075	0.1485	13.8094	0.00531	0.1781	33.5545	0.00452	0.1615	35.759
Mx_HOMCHL002381	0.00341	0.0819	23.975	0.02198	0.0917	4.1745	0.00648	0.087	13.4358
Mx_HOMCHL002387	0.18644	0.1248	0.6693	0.11641	0.256	2.1985	0.04796	0.1575	3.2843
Mx_HOMCHL002400	0.12194	0.2938	2.4097	0.10816	0.1641	1.5172	0.0065	0.1567	24.0956
Mx_HOMCHL002401	0.00414	0.1147	27.7176	0.00373	0.1606	43.0254	0.07837	0.1636	2.0869
Mx_HOMCHL002412	0.00531	0.1381	25.9855	0.00469	0.1815	38.6692	0.10799	0.1889	1.7495
Mx_HOMCHL002414	0.05396	0.0651	1.2062	0.02394	0.085	3.5504	0.03405	0.1099	3.2281
Mx_HOMCHL002417	0.00424	0.103	24.3076	0.00407	0.1533	37.6382	0.00597	0.14	23.4468
Mx_HOMCHL002424	0.11369	0.1158	1.0187	0.09141	0.1639	1.793	0.0047	0.1661	35.3375
Mx_HOMCHL002425	0.02171	0.1031	4.7495	0.05223	0.2275	4.3563	0.00833	0.149	17.8979
Mx_HOMCHL002428	0.0672	0.0467	0.6948	0.05291	0.0724	1.3681	0.0453	0.0573	1.2646
Mx_HOMCHL002432	0.08754	0.1547	1.7676	0.14131	0.2747	1.9444	0.03682	0.3515	9.5471
Mx_HOMCHL002433	0.00379	0.0857	22.5913	0.04575	0.1022	2.2344	0.00418	0.0958	22.9258
Mx_HOMCHL002436	0.04333	0.112	2.5855	0.08333	0.1684	2.0206	0.04522	0.1544	3.4136
Mx_HOMCHL002441	0.00392	0.105	26.8751	0.00389	0.105	26.8751	0.00582	0.147	25.2362
Mx_HOMCHL002471	0.00397	0.1307	33.6227	0.00389	0.1307	33.6227	0.00415	0.1401	33.8025
Mx_HOMCHL002482	0.00905	0.1498	16.5513	0.00713	0.221	31.0004	0.06792	0.155	2.2828
Mx_HOMCHL002488	0.04876	0.1118	2.2938	0.0614	0.1441	2.347	0.00366	0.1311	35.7926
Mx_HOMCHL002489	0.02143	0.0706	3.2938	0.03468	0.0879	2.5344	0.04421	0.0715	1.6177
Mx_HOMCHL002492	0.1223	0.079	0.6456	0.00851	0.173	20.3319	0.00323	0.1097	33.9625
Mx_HOMCHL002493	0.06429	0.0732	1.1386	0.05544	0.1255	2.2637	0.00195	0.0942	48.2607
Mx_HOMCHL002496	0.03153	0.0848	2.6895	0.04756	0.1218	2.5618	0.04244	0.1193	2.8114
Mx_HOMCHL002497	0.00644	0.1055	16.3697	0.00522	0.172	32.9437	0.05782	0.1601	2.7687
Mx_HOMCHL002498	0.0144	0.0601	4.1692	0.02878	0.1254	4.3592	0.02246	0.0858	3.8215
Mx_HOMCHL002512	0.00467	0.0858	18.3803	0.00356	0.1472	41.3087	0.08439	0.1317	1.5603
Mx_HOMCHL002517	0.03065	0.082	2.6765	0.05746	0.1308	2.2771	0.03463	0.117	3.3779
Mx_HOMCHL002521	0.00546	0.0868	15.9149	0.00422	0.1681	39.8548	0.00597	0.133	22.2769
Mx_HOMCHL002522	0.02858	0.1313	4.5926	0.05599	0.232	4.1438	0.02962	0.1422	4.8015
Mx_HOMCHL002527	0.00415	0.1076	25.9223	0.00504	0.1693	33.5606	0.00589	0.1443	24.4967
Mx_HOMCHL002528	0.00996	0.1174	11.7925	0.02989	0.1063	3.5547	0.02543	0.154	6.0564
Mx_HOMCHL002532	0.05145	0.077	1.4976	0.06897	0.1014	1.4707	0.07425	0.0983	1.3244
Mx_HOMCHL002536	0.01971	0.1083	5.4937	0.00426	0.1367	32.0873	0.00659	0.1191	18.0735
Mx_HOMCHL002546	0.10021	0.1129	1.1272	0.12986	0.1313	1.011	0.00477	0.1566	32.8475
Mx_HOMCHL002547	0.00808	0.1566	19.3681	0.00685	0.2119	30.9315	0.02116	0.2015	9.5244
Mx_HOMCHL002548	0.01518	0.0542	3.5724	0.00688	0.0698	10.146	0.02138	0.0681	3.1849
Mx_HOMCHL002552	0.00684	0.1107	16.1718	0.04338	0.0971	2.2375	0.00406	0.097	23.9127
Mx_HOMCHL002553	0.09928	0.0983	0.99	0.06049	0.1727	2.8543	0.05059	0.1574	3.1112
Mx_HOMCHL002554	0.00414	0.0811	19.6095	0.00392	0.1282	32.6777	0.00304	0.1319	43.3458
Mx_HOMCHL002563	0.07734	0.1125	1.4545	0.11055	0.1715	1.5515	0.06565	0.1573	2.3956
Mx_HOMCHL002567	0.00533	0.1358	25.4664	0.00415	0.1461	35.2037	0.00982	0.1979	20.1629
Mx_HOMCHL002570	0.00532	0.1369	25.7439	0.00361	0.1563	43.2505	0.00682	0.2094	30.7141
Mx_HOMCHL002574	0.00729	0.1661	22.7751	0.00365	0.1736	47.5112	0.04675	0.1227	2.6246
Mx_HOMCHL002584	0.0439	0.1254	2.8573	0.02495	0.1368	5.4824	0.01187	0.159	13.3892
Mx_HOMCHL002595	0.01791	0.0829	4.6317	0.06599	0.1252	1.8979	0.00411	0.1353	32.9212
Mx_HOMCHL002602	0.00573	0.1312	22.8803	0.00606	0.2068	34.1443	0.00888	0.2681	30.1931
Mx_HOMCHL002606	0.00599	0.1313	21.8989	0.01457	0.239	16.3991	0.08758	0.1499	1.7118
Mx_HOMCHL002613	0.02257	0.0834	3.6965	0.03295	0.0983	2.9828	0.00282	0.104	36.913
Mx_HOMCHL002615	0.00962	0.1467	15.249	0.0037	0.1479	39.9722	0.00553	0.1804	32.6299
Mx_HOMCHL002622	0.0075	0.12	15.9919	0.00577	0.2458	42.6138	0.06062	0.1676	2.7652
Mx_HOMCHL002623	0.00558	0.1412	25.2924	0.0047	0.2366	50.306	0.0858	0.2095	2.4423
Mx_HOMCHL002627	0.08037	0.1015	1.2628	0.04552	0.1066	2.3409	0.04324	0.1234	2.8529
Mx_HOMCHL002630	0.1022	0.0829	0.8108	0.058	0.132	2.2754	0.03515	0.1156	3.2887
Mx_HOMCHL002639	0.04828	0.1207	2.5008	0.1323	0.1833	1.3857	0.05774	0.1187	2.0562
Mx_HOMCHL002641	0.00466	0.1385	29.6912	0.00531	0.2055	38.7106	0.01054	0.2543	24.1265
Mx_HOMCHL002642	0.00397	0.1071	26.9638	0.00695	0.1791	25.7606	0.09458	0.168	1.776
Mx_HOMCHL002650	0.13333	0.134	1.0054	0.13764	0.1906	1.3848	0.03328	0.1343	4.0357
Mx_HOMCHL002651	0.02579	0.0778	3.0152	0.06353	0.1245	1.9592	0.00408	0.1106	27.1008
Mx_HOMCHL002653	0.01971	0.1508	7.6496	0.0323	0.1491	4.6153	0.04262	0.1743	4.0897
Mx_HOMCHL002656	0.00241	0.08	33.1404	0.00565	0.084	14.8689	0.02611	0.0799	3.0603
Mx_HOMCHL002657	0.00342	0.0897	26.2069	0.16645	0.1806	1.0848	0.00521	0.1402	26.9104
Mx_HOMCHL002670	0.02385	0.1071	4.4919	0.05134	0.1154	2.2483	0.01207	0.0977	8.0899
Mx_HOMCHL002671	0.06188	0.1141	1.8443	0.08863	0.1565	1.766	0.00363	0.1329	36.5932
Mx_HOMCHL002675	0.0568	0.1729	3.0433	0.04143	0.2411	5.8203	0.09934	0.1799	1.8114
Mx_HOMCHL002678	0.00324	0.0721	22.2178	0.10322	0.1132	1.0968	0.0038	0.1024	26.9386
Mx_HOMCHL002685	0.03494	0.1103	3.1568	0.04552	0.1442	3.1684	0.00406	0.1268	31.2457
Mx_HOMCHL002690	0.00582	0.1277	21.9509	0.00631	0.2078	32.9211	0.04408	0.2013	4.5674
Mx_HOMCHL002692	0.0046	0.119	25.8484	0.00593	0.1922	32.4169	0.05348	0.1094	2.0458
Mx_HOMCHL002708	0.00523	0.1247	23.8304	0.00823	0.23	27.9382	0.06978	0.2357	3.3786
Mx_HOMCHL002719	0.00603	0.1456	24.1366	0.00896	0.2334	26.0426	0.08178	0.1645	2.0112
Mx_HOMCHL002732	0.02803	0.0709	2.5316	0.02799	0.0709	2.5316	0.02326	0.0912	3.922
Mx_HOMCHL002734	0.01429	0.1588	11.1086	0.02098	0.1459	6.9533	0.02955	0.1416	4.7909
Mx_HOMCHL002735	0.02577	0.1034	4.0102	0.04869	0.145	2.978	0.06298	0.1372	2.1782
Mx_HOMCHL002737	0.00332	0.0806	24.2993	0.00391	0.1258	32.1416	0.00703	0.184	26.1718
Mx_HOMCHL002741	0.05567	0.1594	2.8639	0.50468	0.3243	0.6425	0.07788	0.2658	3.4125
Mx_HOMCHL002742	0.00493	0.1133	22.9963	0.00634	0.1549	24.4147	0.00454	0.1617	35.6383
Mx_HOMCHL002744	0.00706	0.1537	21.7751	0.00456	0.1648	36.1629	0.02713	0.145	5.3448
Mx_HOMCHL002749	0.00379	0.1162	30.6412	0.0394	0.1018	2.5847	0.05691	0.1221	2.1453
Mx_HOMCHL002750	0.06523	0.1349	2.0676	0.14363	0.159	1.1071	0.00621	0.1705	27.4761
Mx_HOMCHL002753	0.01028	0.1189	11.5647	0.01897	0.1728	9.1079	0.00632	0.1194	18.8939
Mx_HOMCHL002755	0.01685	0.106	6.2937	0.04108	0.1624	3.9537	0.07826	0.1486	1.8984
Mx_HOMCHL002759	0.10596	0.1964	1.8538	0.11698	0.127	1.0854	0.10076	0.1243	1.2337
Mx_HOMCHL002760	0.09359	0.1255	1.3411	0.17329	0.1821	1.0507	0.04991	0.158	3.1655
Mx_HOMCHL002762	0.00449	0.106	23.6272	0.00533	0.1229	23.0686	0.006	0.1841	30.6607
Mx_HOMCHL002771	0.07189	0.1036	1.4411	0.05725	0.1153	2.0145	0.04827	0.1159	2.4021
Mx_HOMCHL002773	0.09488	0.1023	1.0782	0.06294	0.192	3.0512	0.02795	0.152	5.4376
Mx_HOMCHL002778	0.03447	0.1227	3.5604	0.02238	0.0924	4.1266	0.04981	0.1774	3.5627
Mx_HOMCHL002779	0.00968	0.0849	8.7662	0.04375	0.129	2.9483	0.05753	0.1006	1.7487
Mx_HOMCHL002784	0.04774	0.1214	2.5433	0.08659	0.1825	2.1081	0.09534	0.1772	1.8586
Mx_HOMCHL002800	0.18811	0.0973	0.5173	0.08807	0.1472	1.6711	0.00534	0.1467	27.4921
Mx_HOMCHL002802	0.00582	0.1266	21.7397	0.00511	0.1996	39.0406	0.10035	0.1656	1.6502
Mx_HOMCHL002809	0.00546	0.1085	19.8892	0.00427	0.1397	32.7391	0.01174	0.129	10.9902
Mx_HOMCHL002816	0.00413	0.1277	30.9405	0.04532	0.1993	4.3975	0.00522	0.1872	35.8326
Mx_HOMCHL002819	0.00654	0.1691	25.8391	0.03023	0.2399	7.9338	0.08604	0.259	3.0102
Mx_HOMCHL002824	0.09135	0.0815	0.8925	0.06303	0.1121	1.779	0.03368	0.1625	4.824
Mx_HOMCHL002831	0.10097	0.1246	1.234	0.08947	0.2022	2.26	0.04831	0.1707	3.5341
Mx_HOMCHL002834	0.02958	0.0748	2.5274	0.02785	0.0981	3.5221	0.02958	0.0748	2.5274
Mx_HOMCHL002835	0.00361	0.1032	28.5868	0.0056	0.1643	29.319	0.00304	0.0878	28.8553
Mx_HOMCHL002836	0.03086	0.0966	3.131	0.02678	0.1397	5.2173	0.03439	0.1468	4.2667
Mx_HOMCHL002838	0.06968	0.0888	1.2747	0.06666	0.1015	1.5224	0.08339	0.1327	1.5913
Mx_HOMCHL002840	0.29872	0.1524	0.5102	0.09389	0.293	3.1205	0.08865	0.1329	1.499
Mx_HOMCHL002848	0.04189	0.2227	5.3165	0.064	0.0905	1.414	0.03738	0.1474	3.9447
Mx_HOMCHL002849	0.02244	0.0302	1.3456	0.00352	0.0167	4.7494	0.0049	0.0494	10.0747
Mx_HOMCHL002861	0.1009	0.1567	1.5527	0.11626	0.2155	1.8533	0.12126	0.2914	2.4035
Mx_HOMCHL002870	0.03403	0.1507	4.43	0.05645	0.1273	2.2548	0.00669	0.2136	31.9409
Mx_HOMCHL002873	0.00717	0.1622	22.6277	0.00466	0.1667	35.7465	0.10756	0.1517	1.4099
Mx_HOMCHL002876	0.00521	0.1181	22.6577	0.10193	0.184	1.8054	0.00748	0.1723	23.0246
Mx_HOMCHL002877	0.08315	0.1065	1.2808	0.06681	0.1019	1.5248	0.05505	0.1375	2.4986
Mx_HOMCHL002878	0.11346	0.0677	0.5965	0.08423	0.0956	1.1346	0.03177	0.0844	2.657
Mx_HOMCHL002883	0.09008	0.1065	1.1826	0.06664	0.1467	2.202	0.04229	0.1389	3.2852
Mx_HOMCHL002886	0.00518	0.1378	26.5813	0.0064	0.1647	25.7269	0.02378	0.1579	6.64
Mx_HOMCHL002890	0.27244	0.1074	0.3941	0.11916	0.1621	1.3603	0.05744	0.1408	2.4511
Mx_HOMCHL002892	0.02008	0.1125	5.6028	0.01983	0.1329	6.6996	0.00371	0.113	30.4618
Mx_HOMCHL002894	0.00617	0.122	19.7664	0.00722	0.2034	28.159	0.04886	0.1383	2.83
Mx_HOMCHL002895	0.03171	0.0958	3.0207	0.0765	0.1855	2.4248	0.03158	0.131	4.1464
Mx_HOMCHL002897	0.00799	0.1221	15.2863	0.0053	0.2109	39.7504	0.06879	0.192	2.7905
Mx_HOMCHL002910	0.00581	0.1496	25.7509	0.00433	0.1651	38.1595	0.01648	0.1418	8.6056
Mx_HOMCHL002919	0.01777	0.1057	5.9484	0.06359	0.1111	1.7475	0.0041	0.1047	25.5308
Mx_HOMCHL002926	0.04484	0.0851	1.8984	0.08653	0.1335	1.5428	0.07417	0.1421	1.9153
Mx_HOMCHL002936	0.03802	0.1208	3.177	0.06622	0.1809	2.7316	0.0586	0.1593	2.7179
Mx_HOMCHL002942	0.01327	0.0922	6.9466	0.00982	0.2197	22.3702	0.00506	0.1684	33.2595
Mx_HOMCHL002950	0.09843	0.1099	1.1163	0.10193	0.3267	3.205	0.07958	0.1685	2.1171
Mx_HOMCHL002955	0.00646	0.1244	19.2492	0.00491	0.1934	39.4197	0.13163	0.2037	1.5474
Mx_HOMCHL002959	0.12447	0.1218	0.9785	0.10025	0.1501	1.4973	0.08043	0.1428	1.7758
Mx_HOMCHL002961	0.02328	0.0703	3.0201	0.03511	0.0652	1.8572	0.00244	0.0868	35.5459
Mx_HOMCHL002962	0.00441	0.1145	25.9304	0.00583	0.2341	40.129	0.01698	0.2994	17.632
Mx_HOMCHL002964	0.04031	0.0731	1.813	0.05749	0.0829	1.4414	0.0286	0.1137	3.9752
Mx_HOMCHL002969	0.00543	0.1076	19.8284	0.11837	0.1674	1.4146	0.10388	0.1556	1.4981
Mx_HOMCHL002996	0.01968	0.0853	4.333	0.03695	0.137	3.7067	0.04108	0.1366	3.3256
Mx_HOMCHL003003	0.00351	0.0964	27.4526	0.05095	0.1268	2.4881	0.00429	0.1506	35.0994
Mx_HOMCHL003026	0.00701	0.1362	19.441	0.08514	0.1565	1.8379	0.06687	0.1466	2.1927
Mx_HOMCHL003039	0.13844	0.1154	0.8336	0.20941	0.2018	0.9636	0.02105	0.319	15.1526
Mx_HOMCHL003040	0.00384	0.1063	27.7048	0.00489	0.1437	29.4098	0.00641	0.1383	21.575
Mx_HOMCHL003041	0.00565	0.1267	22.4363	0.08002	0.1124	1.4052	0.02373	0.1486	6.2607
Mx_HOMCHL003044	0.08075	0.1474	1.8248	0.11195	0.1754	1.5668	0.12833	0.1883	1.4675
Mx_HOMCHL003053	0.0771	0.0796	1.0324	0.06637	0.0947	1.4268	0.01453	0.1125	7.7433
Mx_HOMCHL003060	0.00524	0.1492	28.466	0.04485	0.1957	4.3629	0.06774	0.2487	3.6715
Mx_HOMCHL003064	0.01011	0.0592	5.8567	0.04151	0.0639	1.5387	0.00384	0.089	23.1549
Mx_HOMCHL003067	0.13059	0.1386	1.0613	0.04937	0.1904	3.8569	0.11022	0.2188	1.9852
Mx_HOMCHL003068	0.07347	0.0828	1.1269	0.06499	0.1153	1.7741	0.00307	0.1254	40.7905
Mx_HOMCHL003070	0.15061	0.1464	0.9717	0.21754	0.2447	1.1249	0.11932	0.2569	2.1529
Mx_HOMCHL003082	0.00538	0.1689	31.3884	0.00669	0.2989	44.6691	0.00709	0.2192	30.8946
Mx_HOMCHL003088	0.00472	0.1094	23.1573	0.05966	0.1255	2.1031	0.00511	0.175	34.2542
Mx_HOMCHL003090	0.12225	0.0878	0.7178	0.03764	0.1327	3.5263	0.01495	0.1442	9.6441
Mx_HOMCHL003094	0.03255	0.0956	2.9379	0.04386	0.161	3.6698	0.05373	0.1222	2.275
Mx_HOMCHL003105	0.13475	0.1344	0.9975	0.10011	0.2274	2.2714	0.14136	0.2132	1.5083
Mx_HOMCHL003109	0.00587	0.1372	23.3789	0.01016	0.1307	12.8585	0.06245	0.1609	2.5758
Mx_HOMCHL003114	0.01663	0.1173	7.0499	0.08058	0.2104	2.6118	0.14535	0.156	1.073
Mx_HOMCHL003116	0.00584	0.1346	23.0605	0.00724	0.254	35.0868	0.08553	0.2159	2.5242
Mx_HOMCHL003119	0.07586	0.0754	0.9938	0.03008	0.1084	3.6023	0.02858	0.0984	3.4427
Mx_HOMCHL003135	0.08763	0.1013	1.1566	0.04634	0.1424	3.0735	0.02932	0.1536	5.2382
Mx_HOMCHL003144	0.1168	0.122	1.0441	0.11199	0.1549	1.3835	0.02032	0.1484	7.3058
Mx_HOMCHL003147	0.08941	0.1401	1.5663	0.1232	0.1609	1.3057	0.04723	0.18	3.811
Mx_HOMCHL003148	0.00395	0.1091	27.6195	0.00587	0.2113	36.0087	0.05094	0.1412	2.771
Mx_HOMCHL003167	0.00255	0.0723	28.3265	0.00312	0.1171	37.5882	0.0057	0.1237	21.714
Mx_HOMCHL003173	0.00449	0.1577	35.1488	0.00423	0.1547	36.5291	0.00548	0.1254	22.8975
Mx_HOMCHL003175	0.02108	0.0834	3.9579	0.05249	0.1045	1.9911	0.04712	0.1183	2.5098
Mx_HOMCHL003177	0.00661	0.12	18.1466	0.037	0.1479	3.9971	0.01003	0.2454	24.4667
Mx_HOMCHL003180	0.00632	0.1441	22.7855	0.00999	0.2836	28.3814	0.00348	0.1376	39.4744
Mx_HOMCHL003191	0.00901	0.1724	19.1445	0.10197	0.2065	2.0253	0.10501	0.1544	1.4701
Mx_HOMCHL003204	0.0082	0.1169	14.25	0.01842	0.1687	9.1585	0.10237	0.1524	1.4887
Mx_HOMCHL003207	0.00941	0.1193	12.6722	0.03585	0.0875	2.4419	0.04751	0.1434	3.018
Mx_HOMCHL003211	0.02597	0.1486	5.7229	0.05084	0.1106	2.175	0.11413	0.188	1.647
Mx_HOMCHL003218	0.02906	0.1128	3.8816	0.08921	0.1459	1.6354	0.06092	0.1521	2.4959
Mx_HOMCHL003219	0.07338	0.1633	2.225	0.17281	0.1812	1.0485	0.00733	0.1905	26.0066
Mx_HOMCHL003224	0.04362	0.1346	3.0853	0.08044	0.183	2.2753	0.00325	0.2201	67.7151
Mx_HOMCHL003247	0.0218	0.1025	4.7006	0.05257	0.1943	3.6962	0.00306	0.1132	36.9709
Mx_HOMCHL003252	0.00936	0.1192	12.7312	0.056	0.1678	2.9954	0.00526	0.1963	37.3531
Mx_HOMCHL003258	0.00225	0.0551	24.4951	0.00403	0.0467	11.5838	0.00424	0.0795	18.768
Mx_HOMCHL003269	0.0589	0.1142	1.939	0.09035	0.1338	1.4808	0.00651	0.1146	17.6115
Mx_HOMCHL003270	0.01771	0.1128	6.3677	0.05546	0.1582	2.8525	0.0572	0.1648	2.882
Mx_HOMCHL003271	0.05008	0.0423	0.8448	0.01376	0.0224	1.628	0.01915	0.1206	6.3007
Mx_HOMCHL003272	0.00947	0.1343	14.1786	0.00617	0.2493	40.3929	0.08353	0.1762	2.11
Mx_HOMCHL003276	0.03863	0.1107	2.8653	0.07054	0.1961	2.7804	0.01546	0.1567	10.1391
Mx_HOMCHL003277	0.00668	0.1238	18.5385	0.00608	0.1871	30.7463	0.07545	0.1508	1.9993
Mx_HOMCHL003306	0.1079	0.1327	1.2297	0.1766	0.2511	1.4219	0.02727	0.1623	5.9534
Mx_HOMCHL003307	0.00795	0.2032	25.563	0.00566	0.2692	47.5875	0.17118	0.2889	1.6878
Mx_HOMCHL003327	0.00455	0.1191	26.2045	0.06185	0.2013	3.2551	0.00814	0.5339	65.5811
Mx_HOMCHL003329	0.0127	0.1468	11.5587	0.00577	0.2082	36.0872	0.00477	0.142	29.7926
Mx_HOMCHL003344	0.00392	0.101	25.7786	0.00243	0.1247	51.3611	0.0043	0.1502	34.9286
Mx_HOMCHL003351	0.06942	0.112	1.6129	0.04959	0.1883	3.798	0.06761	0.1579	2.3362
Mx_HOMCHL003352	0.11579	0.0966	0.8339	0.08055	0.1512	1.8767	0.05303	0.1169	2.2042
Mx_HOMCHL003364	0.1631	0.1178	0.7221	0.09777	0.1485	1.5187	0.05855	0.1461	2.4959
Mx_HOMCHL003368	0.00503	0.1383	27.5066	0.1368	0.1747	1.2772	0.09901	0.1453	1.4678
Mx_HOMCHL003388	0.00541	0.1162	21.4678	0.21169	0.1972	0.9317	0.04278	0.2351	5.4941
Mx_HOMCHL003391	0.04751	0.1343	2.8273	0.05538	0.1551	2.8	0.00706	0.1723	24.4179
Mx_HOMCHL003395	0.086	0.1565	1.82	0.23986	0.2782	1.1599	0.06103	0.1935	3.1698
Mx_HOMCHL003428	0.00281	0.0862	30.6728	0.07319	0.1353	1.8485	0.09059	0.1343	1.4826
Mx_HOMCHL003435	0.00656	0.122	18.6057	0.00774	0.2346	30.3236	0.0106	0.2777	26.204
Mx_HOMCHL003440	0.04371	0.1193	2.7291	0.03319	0.1669	5.0294	0.05521	0.1461	2.6468
Mx_HOMCHL003445	0.00666	0.1277	19.1576	0.00542	0.1718	31.702	0.04146	0.1288	3.1067
Mx_HOMCHL003470	0.01735	0.1434	8.2618	0.00743	0.183	24.6141	0.10105	0.3005	2.9733
Mx_HOMCHL003480	0.00956	0.1928	20.1718	0.09535	0.3305	3.4668	0.01165	0.3171	27.2219
Mx_HOMCHL003481	0.00703	0.1807	25.7035	0.00661	0.221	33.4184	0.00997	0.2116	21.2295
Mx_HOMCHL003482	0.00625	0.1469	23.4831	0.00304	0.1346	44.3232	0.00427	0.1352	31.6833
Mx_HOMCHL003494	0.00283	0.0924	32.6106	0.19706	0.176	0.8931	0.02385	0.1139	4.7776
Mx_HOMCHL003501	0.00661	0.1615	24.4509	0.00454	0.2237	49.2698	0.00635	0.2907	45.7866
Mx_HOMCHL003503	0.06651	0.136	2.0449	0.00748	0.1466	19.606	0.00426	0.1513	35.548
Mx_HOMCHL003509	0.08637	0.0836	0.9674	0.04368	0.1069	2.4479	0.04293	0.0907	2.1126
Mx_HOMCHL003540	0.00551	0.1092	19.8029	0.07904	0.2593	3.281	0.00517	0.1839	35.5754
Mx_HOMCHL003549	0.00564	0.1212	21.486	0.00628	0.2299	36.6124	0.05557	0.1991	3.5821
Mx_HOMCHL003559	0.00457	0.122	26.6811	0.00541	0.1795	33.1803	0.00597	0.1613	27.0094
Mx_HOMCHL003561	0.14954	0.1193	0.7978	0.25559	0.2337	0.9143	0.02882	0.2072	7.1882
Mx_HOMCHL003570	0.07716	0.1298	1.6822	0.00523	0.1636	31.3067	0.0113	0.2231	19.7522
Mx_HOMCHL003579	0.00743	0.166	22.3289	0.00699	0.1677	23.984	0.20899	0.3731	1.7855
Mx_HOMCHL003585	0.00787	0.1135	14.4243	0.012	0.1464	12.2038	0.03951	0.1161	2.9376
Mx_HOMCHL003602	0.00353	0.1024	29.0419	0.00595	0.1924	32.358	0.01822	0.1148	6.3011
Mx_HOMCHL003613	0.01665	0.0969	5.8229	0.03854	0.196	5.0852	0.03704	0.1427	3.8521
Mx_HOMCHL003631	0.00629	0.1401	22.2613	0.00682	0.1771	25.9484	0.04589	0.1855	4.0425
Mx_HOMCHL003633	0.0067	0.2398	35.8194	0.08736	0.1723	1.972	0.08184	0.1395	1.7046
Mx_HOMCHL003634	0.00533	0.0961	18.0544	0.00606	0.1692	27.9274	0.0566	0.1523	2.6907
Mx_HOMCHL003647	0.00889	0.092	10.3497	0.00345	0.1387	40.2387	0.00455	0.1262	27.7738
Mx_HOMCHL003651	0.33357	0.1153	0.3458	0.15244	0.0985	0.6465	0.00712	0.217	30.4751
Mx_HOMCHL003655	0.04312	0.0468	1.0863	0.0351	0.0828	2.3579	0.01732	0.0667	3.8521
Mx_HOMCHL003658	0.00552	0.1475	26.7258	0.00596	0.1847	30.986	0.00793	0.2674	33.7453
Mx_HOMCHL003669	0.08435	0.1644	1.9491	0.13032	0.2085	1.6001	0.16632	0.2434	1.4635
Mx_HOMCHL003691	0.00541	0.1331	24.5834	0.00758	0.244	32.1835	0.00665	0.156	23.4759
Mx_HOMCHL003711	0.17612	0.1084	0.6152	0.08509	0.1555	1.8282	0.10001	0.2007	2.0072
Mx_HOMCHL003715	0.00544	0.1752	32.224	0.01208	0.2953	24.4416	0.07617	0.2189	2.8736
Mx_HOMCHL003749	0.00547	0.139	25.4254	0.00682	0.2611	38.3013	0.12393	0.3536	2.8531
Mx_HOMCHL003760	0.0493	0.1315	2.6677	0.05493	0.0641	1.1679	0.00608	0.2101	34.5381
Mx_HOMCHL003764	0.036	0.126	3.5015	0.18319	0.1021	0.5574	0.25707	0.2045	0.7957
Mx_HOMCHL003794	0.00862	0.1577	18.302	0.14532	0.2685	1.8475	0.00985	0.2133	21.6554
Mx_HOMCHL003832	0.10941	0.1824	1.6672	0.12825	0.2316	1.8059	0.14129	0.2626	1.8583
Mx_HOMCHL003842	0.1217	0.146	1.1994	0.14623	0.2072	1.4168	0.04919	0.15	3.0485
Mx_HOMCHL003855	0.00541	0.1247	23.057	0.10356	0.3005	2.9019	0.04971	0.1446	2.9082
Mx_HOMCHL003857	0.00539	0.1467	27.2442	0.00926	0.1457	15.7394	0.04475	0.1255	2.8049
Mx_HOMCHL003865	0.067	0.1349	2.0128	0.08006	0.2725	3.4043	0.00893	0.2212	24.7555
Mx_HOMCHL003866	0.00453	0.1332	29.3975	0.01053	0.3304	31.3705	0.01066	0.1917	17.9777
Mx_HOMCHL003875	0.08553	0.1391	1.6261	0.05408	0.1952	3.6085	0.04964	0.2437	4.9084
Mx_HOMCHL003886	0.00941	0.19	20.19	0.01387	0.3437	24.7879	0.00863	0.3353	38.8564
Mx_HOMCHL003915	0.00939	0.1687	17.9631	0.00577	0.2411	41.8188	0.00886	0.2232	25.1757
Mx_HOMCHL003922	0.07227	0.1475	2.0416	0.08326	0.2114	2.5392	0.01585	0.1586	10.0069
Mx_HOMCHL003936	0.00895	0.2052	22.8733	0.009	0.2052	22.8733	0.00622	0.219	35.2406
Mx_HOMCHL003954	0.02829	0.196	6.9281	0.00344	0.1517	44.0496	0.00389	0.297	76.3241
Mx_HOMCHL003990	0.01495	0.1454	9.7239	0.01787	0.2698	15.0995	0.02679	0.1968	7.3477
Mx_HOMCHL004059	0.04607	0.1637	3.5533	0.06031	0.1539	2.5513	0.00546	0.2394	43.8672
Mx_HOMCHL004087	0.00581	0.1434	24.673	0.01136	0.1741	15.3273	0.00506	0.1628	32.1346
Mx_HOMCHL004099	0.00442	0.1279	28.9184	0.00869	0.2354	27.0973	0.03269	0.1333	4.0781
Mx_HOMCHL004106	0.00583	0.1606	27.5574	0.00899	0.2056	22.8652	0.14686	0.2949	2.0081
Mx_HOMCHL004117	0.03821	0.1091	2.8546	0.04923	0.2366	4.8065	0.0051	0.2477	48.5524
Mx_HOMCHL004162	0.00977	0.1713	17.54	0.00759	0.2747	36.182	0.12946	0.2908	2.2462
Mx_HOMCHL004179	0.00573	0.1475	25.7419	0.0027	0.1145	42.3861	0.00475	0.1471	30.969
Mx_HOMCHL004204	0.02903	0.1595	5.4924	0.07515	0.1755	2.3352	0.00351	0.1318	37.5347
Mx_HOMCHL004213	0.21218	0.1392	0.6563	0.09277	0.4397	4.7402	0.15159	0.2952	1.9473
Mx_HOMCHL004221	0.02877	0.0683	2.3746	0.0179	0.0808	4.5114	0.00967	0.1068	11.0388
Mx_HOMCHL004259	0.00705	0.1002	14.2248	0.08684	0.2782	3.203	0.22546	0.4015	1.7808
Mx_HOMCHL004261	0.00652	0.1519	23.2995	0.00809	0.4397	54.3743	0.09161	0.1408	1.5369
Mx_HOMCHL004329	0.00836	0.1922	22.997	0.00446	0.2237	50.2139	0.01819	0.1413	7.7684
Mx_HOMCHL004386	0.00466	0.1349	28.9405	0.09331	0.1405	1.5062	0.1111	0.1741	1.5668
Mx_HOMCHL004495	0.10228	0.1463	1.43	0.06558	0.1293	1.9723	0.00591	0.2155	36.4524
Mx_HOMCHL004497	0.00755	0.1668	22.0941	0.00478	0.1875	39.2492	0.00883	0.2624	29.7047
Mx_HOMCHL004567	0.01137	0.2069	18.1997	0.00905	0.1987	21.9486	0.11831	0.2271	1.9198
Mx_HOMCHL004569	0.02017	0.1156	5.7296	0.04267	0.2884	6.7575	0.14	0.2132	1.5228
Mx_HOMCHL004597	0.03786	0.1823	4.8163	0.06248	0.1509	2.4154	0.10711	0.193	1.8019
Mx_HOMCHL004687	0.00619	0.1534	24.7941	0.00404	0.1237	30.6108	0.00639	0.1987	31.115
Mx_HOMCHL004722	0.02976	0.1505	5.0567	0.03329	0.1444	4.3372	0.0043	0.098	22.8099
Mx_HOMCHL004775	0.06456	0.1117	1.7305	0.01592	0.184	11.5583	0.00467	0.2056	44.0526
Mx_HOMCHL004912	0.05505	0.1402	2.5469	0.07875	0.1227	1.5575	0.05328	0.1695	3.1819
Mx_HOMCHL004928	0.01051	0.1346	12.8021	0.01781	0.1269	7.1277	0.05013	0.1261	2.5157
Mx_HOMCHL004963	0.15794	0.1073	0.6794	0.10656	0.0549	0.5154	0.00455	0.2287	50.2413
Mx_HOMCHL005051	0.00365	0.1363	37.3357	0.02303	0.0942	4.0922	0.00453	0.1541	34.0189
Mx_HOMCHL005087	0.00444	0.1234	27.8228	0.0043	0.1692	39.3613	0.00473	0.2192	46.3213
Mx_HOMCHL005095	0.05614	0.0953	1.6979	0.05336	0.0723	1.3543	0.05047	0.2012	3.9868
Mx_HOMCHL005226	0.00327	0.104	31.8274	0.01844	0.1232	6.6777	0.02631	0.0464	1.7656
Average	0.0430579	0.104765	10.0479	0.0504162	0.150394	10.8909	0.0419795	0.14578	10.858
Median	0.02829	0.1034	3.177	0.04375	0.1442	2.8334	0.03342	0.14	3.4136
