# Supplementary material for: Genome-wide patterns of selection–drift variation strongly associate with organismal traits across the green plant lineage
Source: Genome Res. 2024 Aug;34(8):1130–9. doi: 10.1101/gr.279002.124 (PMC11444171; doi:10.1101/gr.279002.124)
Supplement: Supplement 19 [file Supplemental_Table_S7.xlsx]

## Sheet: Table_S7_Lb_Mx
Supplemental Table S7: PAML outputs for body architecture + life cycles combined models of liberal dataset. Lists the dN, dS and dN/dS values of low copy genes of unicellular haploid, multicellular haploid, multicellular haploid-diploid, siphonous diploid and siphonocladous haploid-diploid algae from liberal dataset.
	Unicellular Haploid			Multicellular Haploid			Multicellular haploid-diploid			Siphonous diploid			Siphonocladous haploid-diploid
	dN	dS	dN/dS	dN	dS	dN/dS	dN	dS	dN/dS	dN	dS	dN/dS	dN	dS	dN/dS
LM_HOMCHL000439	0.08024	0.0405	0.505	0.02828	0.2122	7.5024	0.0384	0.0426	1.1099	0.00728	0.0885	12.1544	0.0005	0.0331	66.0562
LM_HOMCHL000496	0.143	0.0738	0.5163	0.04675	0.0684	1.4643	0.0799	0.1018	1.2745	0.00402	0.0993	24.7025	0.00213	0.0725	34.0767
LM_HOMCHL000545	0.07015	0.1391	1.9825	0.06152	0.1669	2.7136	0.08067	0.1961	2.4308	0.01023	0.244	23.8417
LM_HOMCHL000664	0.1236	0.0604	0.4887	0.05394	0.052	0.9642	0.10219	0.0842	0.8243	0.00275	0.11	39.9918	0.00184	0.0781	42.4074
LM_HOMCHL000732	0.00279	0.057	20.4679	0.00194	0.0743	38.3248	0.00478	0.0742	15.5209	0.01955	0.0849	4.3439	0.00332	0.0829	24.9991
LM_HOMCHL000737	0.08383	0.0535	0.6387	0.06877	0.0513	0.7461	0.04245	0.0985	2.3198	0.00209	0.104	49.6443	0.01201	0.05	4.1623
LM_HOMCHL000773	0.12375	0.0686	0.5545	0.00207	0.0992	47.8215	0.06359	0.1739	2.7345	0.00505	0.2174	43.0219	0.00361	0.282	78.036
LM_HOMCHL000781	0.05548	0.0372	0.6714	0.02372	0.027	1.1397	0.03888	0.0374	0.962	0.03856	0.0502	1.3012	0.00158	0.0099	6.2521
LM_HOMCHL000789	0.10055	0.1071	1.0647	0.07782	0.1919	2.4663	0.06808	0.1549	2.2751	0.00631	0.2307	36.5744	0.00562	0.3634	64.6435
LM_HOMCHL000807	0.09979	0.0721	0.7229	0.0223	0.1502	6.7388	0.10986	0.2761	2.5126	0.0021	0.0964	45.9893	0.17938	0.2854	1.5913
LM_HOMCHL000817	0.08515	0.0529	0.6212	0.00206	0.06	29.049	0.01024	0.0885	8.6394	0.00243	0.1184	48.7114	0.00131	0.096	73.4793
LM_HOMCHL000826	0.17394	0.1081	0.6212	0.06013	0.1093	1.8178	0.11569	0.22	1.9013	0.02314	0.4547	19.6514	0.00586	0.374	63.7982
LM_HOMCHL000844	0.04405	0.0337	0.7647	0.02107	0.0269	1.2755	0.03545	0.0426	1.2013	0.00841	0.0332	3.9495	0.00118	0.0629	53.5328
LM_HOMCHL000878	0.00664	0.1086	16.3636	0.05396	0.1305	2.4179	0.02244	0.1468	6.5435	0.04948	0.1362	2.7521	0.00162	0.0804	49.6712
LM_HOMCHL000897	0.02831	0.1035	3.6568	0.00413	0.183	44.3487	0.04296	0.1556	3.6227	0.00419	0.183	44.3487	0.00579	0.4024	69.4799
LM_HOMCHL000921	0.08021	0.0465	0.5795	0.01186	0.0403	3.4	0.02945	0.068	2.3086	0.00225	0.0757	33.6007	0.0016	0.0856	53.3121
LM_HOMCHL000939	0.0072	0.1174	16.2948	0.05002	0.1451	2.901	0.02376	0.1948	8.1994	0.90492			0.00139	0.0512	36.7291
LM_HOMCHL000944	0.09454	0.0453	0.4791	0.04569	0.0609	1.3326	0.04939	0.073	1.4791	0.00207	0.071	34.2993	0.02285	0.0399	1.7458
LM_HOMCHL000952	0.04666	0.0688	1.4743	0.02034	0.0676	3.3252	0.0312	0.0748	2.3974	0.00441	0.0914	20.737	0.00295	0.0691	23.4718
LM_HOMCHL000959	0.00429	0.0775	18.0657	0.03872	0.069	1.7811	0.02276	0.1575	6.9195	0.0062	0.1337	21.5563	0.00178	0.0965	54.1217
LM_HOMCHL000962	0.07223	0.0437	0.6054	0.00952	0.0377	3.9596	0.04354	0.0407	0.9349	0.00334	0.0749	22.4009	0.00656	0.047	7.1645
LM_HOMCHL000964	0.06658	0.0635	0.9544	0.02814	0.0462	1.6425	0.03696	0.0989	2.6759	0.01964	0.249	12.6752	0.04203	0.2546	6.0569
LM_HOMCHL000975	0.17276	0.0841	0.487	0.02357	0.0965	4.0942	0.16091	0.1734	1.0774	0.00411	0.2055	49.9976	0.06034	0.2923	4.8431
LM_HOMCHL000977	0.04283	0.0352	0.8228	0.02533	0.0257	1.0133	0.0409	0.0646	1.5785	0.00127	0.052	41.1151	0.00081	0.0472	58.1499
LM_HOMCHL000979	0.08497	0.0562	0.6607	0.03642	0.0525	1.4422	0.04686	0.0812	1.7323	0.02001	0.118	5.8989	0.00122	0.0837	68.5512
LM_HOMCHL000982	0.08355	0.0711	0.8513	0.01994	0.0938	4.703	0.03918	0.1635	4.172	0.0074	0.0919	12.4261
LM_HOMCHL000998	0.06616	0.0472	0.7133	0.02308	0.0346	1.5001	0.03483	0.0493	1.4159	0.00111	0.0512	45.9444	0.00539	0.0326	6.0481
LM_HOMCHL001007	0.08493	0.0695	0.8186	0.0108	0.0565	5.2305	0.03836	0.0575	1.4988	0.03084	0.0947	3.0721	0.0026	0.0307	11.8182
LM_HOMCHL001008	0.10814	0.0915	0.8464	0.06128	0.0834	1.3601	0.09998	0.1318	1.3178	0.00318	0.1359	42.7002	0.00244	0.1309	53.5668
LM_HOMCHL001026	0.0822	0.0635	0.7725	0.06886	0.0784	1.1387	0.07888	0.099	1.2545	0.00218	0.1036	47.5008	0.02393	0.0891	3.7242
LM_HOMCHL001040	0.11965	0.1018	0.851	0.05707	0.1216	2.1314	0.07467	0.1769	2.3692	0.0055	0.2076	37.7732	0.0023	0.1476	64.1591
LM_HOMCHL001069	0.04423	0.0629	1.4211	0.08504	0.0994	1.1691	0.04688	0.0919	1.9593	0.00212	0.0991	46.8071	0.00134	0.0857	64.0863
LM_HOMCHL001123	0.03852	0.0363	0.9416	0.01872	0.0337	1.8004	0.03004	0.0587	1.9525	0.00592	0.0619	10.4497	0.00792	0.0343	4.3232
LM_HOMCHL001141	0.08706	0.0697	0.8008	0.01548	0.1075	6.9405	0.06474	0.1187	1.8336	0.01015	0.1519	14.9664	0.00186	0.1026	55.0928
LM_HOMCHL001147	0.10319	0.0714	0.6916	0.00169	0.0611	36.2256	0.05731	0.0987	1.7222	0.00414	0.0885	21.3861	0.00126	0.0702	55.7045
LM_HOMCHL001154	0.09608	0.1048	1.0903	0.0439	0.0837	1.9067	0.07293	0.1464	2.0079	0.01216	0.1399	11.5007	0.00438	0.1106	25.2328
LM_HOMCHL001160	0.09865	0.0455	0.4612	0.00116	0.0512	43.9798	0.05926	0.1431	2.414	0.00368	0.0765	20.785	0.00135	0.0832	61.7442
LM_HOMCHL001161	0.11931	0.0965	0.8091	0.00411	0.1255	30.5191	0.06677	0.1433	2.1463	0.00435	0.1645	37.7772	0.00202	0.1288	63.8351
LM_HOMCHL001169	0.00537	0.1285	23.8362	0.05175	0.2007	3.8783	0.00545	0.1285	23.8362	0.00449	0.2206	49.1448	0.00668	0.4366	65.3588
LM_HOMCHL001170	0.16345	0.082	0.5018	0.02096	0.0866	4.1321	0.09404	0.1198	1.2744	0.01212	0.1274	10.5092	0.00329	0.1639	49.8808
LM_HOMCHL001173	0.15492	0.1019	0.6577	0.06174	0.0926	1.4993	0.0651	0.1313	2.0168	0.00397	0.1494	37.6471	0.08072	0.104	1.288
LM_HOMCHL001175	0.03571	0.1985	5.5582	0.03595	0.1113	3.0949	0.00335	0.1481	44.2269	0.07091	0.2094	2.9538	0.00465	0.2826	60.83
LM_HOMCHL001177	0.11161	0.1066	0.9552	0.05323	0.1523	2.8605	0.08061	0.1706	2.1168	0.00524	0.1934	36.8852	0.00402	0.1823	45.3105
LM_HOMCHL001182	0.0968	0.0893	0.9226	0.03486	0.0756	2.1692	0.04823	0.1736	3.5994	0.0064	0.1886	29.4828	0.02003	0.2586	12.9104
LM_HOMCHL001203	0.00361	0.0751	20.8018	0.03555	0.0671	1.8891	0.02245	0.3471	15.4656	0.03896	0.1102	2.8273	0.00098	0.0658	67.1983
LM_HOMCHL001205	0.0566	0.0325	0.5735	0.02241	0.0378	1.6883	0.0177	0.0451	2.5488	0.00231	0.0706	30.5361	0.00106	0.033	31.1619
LM_HOMCHL001216	0.0171	0.0566	3.3105	0.00204	0.0677	33.175	0.01117	0.0724	6.4846	0.00466	0.0772	16.5584	0.0012	0.0811	67.5271
LM_HOMCHL001217	0.02149	0.074	3.4446	0.03011	0.0873	2.8993	0.03677	0.0844	2.2961	0.01104	0.285	25.8109	0.0091	0.3758	41.3176
LM_HOMCHL001230	0.03986	0.0893	2.2391	0.03081	0.0815	2.647	0.04612	0.0959	2.0796	0.00722	0.1191	16.4867	0.01242	0.0918	7.397
LM_HOMCHL001240	0.11564	0.1443	1.2481	0.00881	0.1943	22.0416	0.10717	0.2504	2.3358	0.05628	0.2853	5.0693	0.098	0.4419	4.5096
LM_HOMCHL001242	0.06707	0.0607	0.9048	0.04056	0.0471	1.1616	0.03458	0.0643	1.8605	0.00299	0.1333	44.6193	0.00166	0.0902	54.2143
LM_HOMCHL001248	0.00455	0.1123	24.6687	0.14581	0.1503	1.031	0.04419	0.2238	5.0637	0.00339	0.118	34.8154	0.00269	0.1348	50.0686
LM_HOMCHL001253	0.1437	0.0947	0.6591	0.03197	0.0971	3.0368	0.0577	0.154	2.6688	0.01059	0.1664	15.7059	0.00295	0.143	48.4962
LM_HOMCHL001258	0.00551	0.1152	20.9181	0.07898	0.1623	2.0554	0.00429	0.1782	41.5185	0.0053	0.2421	45.638	0.00352	0.1936	55.0408
LM_HOMCHL001261	0.0544	0.0606	1.1138	0.09528	0.0927	0.9734	0.05431	0.2009	3.6987	0.01303	0.0891	6.8384	0.00165	0.1194	72.1694
LM_HOMCHL001265	0.00523	0.1026	19.6189	0.06807	0.0984	1.4457	0.03193	0.132	4.1353	0.00411	0.1333	32.3988	0.0017	0.0907	53.5119
LM_HOMCHL001273	0.09378	0.071	0.7575	0.0642	0.0783	1.2201	0.08161	0.0878	1.0762	0.01158	0.112	9.6721	0.0087	0.1016	11.6627
LM_HOMCHL001274	0.06382	0.0431	0.6749	0.03393	0.0469	1.3837	0.05304	0.0739	1.3931	0.00182	0.0727	39.9851	0.00597	0.058	9.726
LM_HOMCHL001278	0.04886	0.0339	0.6947	0.03613	0.0305	0.845	0.03194	0.0486	1.5232	0.00146	0.061	41.5549	0.00148	0.061	41.5549
LM_HOMCHL001285	0.00491	0.1081	22.0316	0.08474	0.1299	1.5325	0.03601	0.1644	4.5671	0.00455	0.1812	39.8346	0.04538	0.1665	3.669
LM_HOMCHL001287	0.03108	0.0933	3.0018	0.02736	0.0613	2.2393	0.03437	0.2093	6.0904	0.00543	0.3288	60.5421
LM_HOMCHL001292	0.00263	0.0724	27.5021	0.00269	0.0724	27.5021	0.00546	0.1493	27.3223	0.00278	0.0941	34.9575	0.00146	0.0898	61.3895
LM_HOMCHL001293	0.00673	0.1288	19.144	0.06774	0.173	2.5541	0.00358	0.1461	40.8112	0.00735	0.2538	34.5103
LM_HOMCHL001305	0.0056	0.1523	27.1724	0.07995	0.1582	1.9792	0.04452	0.2035	4.57	0.00518	0.2264	43.7042	0.00314	0.1965	62.6208
LM_HOMCHL001327	0.06093	0.0764	1.2545	0.10021	0.1028	1.0256	0.09137	0.1402	1.5348	0.00299	0.1203	40.2789	0.00205	0.1019	49.6273
LM_HOMCHL001339	0.00321	0.0825	25.6945	0.0472	0.1116	2.3644	0.01591	0.2038	12.8139	0.00376	0.1666	44.3621	0.00154	0.09	58.3422
LM_HOMCHL001344	0.08595	0.0858	0.9978	0.05807	0.0993	1.7104	0.05935	0.1372	2.3122	0.00478	0.1649	34.5098	0.00621	0.1106	17.8117
LM_HOMCHL001356	0.01	0.1191	11.9109	0.09178	0.1057	1.1516	0.00657	0.1639	24.9396	0.00677	0.1767	26.0968	0.00313	0.194	61.9004
LM_HOMCHL001359	0.07521	0.0616	0.8186	0.03307	0.0768	2.3218	0.05021	0.0995	1.9813	0.00302	0.1095	36.2438	0.00114	0.0606	53.303
LM_HOMCHL001361	0.006	0.1584	26.4281	0.09626	0.135	1.4024	0.06973	0.2228	3.195	0.00522	0.2524	48.3047	0.0046	0.3178	69.0845
LM_HOMCHL001362	0.00408	0.0797	19.5659	0.06952	0.085	1.223	0.00358	0.0907	25.3277	0.0054	0.1419	26.2794	0.67942	0.2287	0.3366
LM_HOMCHL001367	0.06399	0.0615	0.9617	0.00384	0.0542	14.1313	0.02668	0.1794	6.7267	0.00261	0.0861	32.9979	0.00201	0.1223	60.9134
LM_HOMCHL001369	0.00425	0.0831	19.5429	0.02405	0.0797	3.3157	0.00579	0.1129	19.4932	0.00326	0.1021	31.2923	0.00392	0.1124	28.7159
LM_HOMCHL001370	0.03745	0.0755	2.0157	0.08126	0.1087	1.3373	0.04639	0.2051	4.4212	0.01156	0.1139	9.8535	0.00195	0.0992	51.0016
LM_HOMCHL001372	0.00422	0.0932	22.0721	0.00317	0.1337	43.6007	0.00307	0.1337	43.6007	0.01373	0.2359	17.1838	0.00337	0.2157	63.9379
LM_HOMCHL001374	0.12235	0.1016	0.8306	0.05884	0.121	2.0567	0.04854	0.1556	3.2064	0.00631	0.1929	30.5396	0.02562	0.1483	5.7896
LM_HOMCHL001387	0.03474	0.0859	2.4733	0.03796	0.0962	2.5345	0.05776	0.1234	2.1371	0.00675	0.1082	16.0234	0.00177	0.1119	63.1673
LM_HOMCHL001395	0.12052	0.1171	0.9715	0.09514	0.1404	1.4758	0.13948	0.139	0.9966	0.0339	0.2463	7.265	0.00995	0.107	10.7456
LM_HOMCHL001409	0.05069	0.0741	1.4621	0.08588	0.079	0.9205	0.04924	0.1142	2.3196	0.0031	0.1725	55.5899	0.03631	0.0615	1.6924
LM_HOMCHL001412	0.13135	0.1018	0.7747	0.10267	0.1316	1.2815	0.13255	0.1784	1.346	0.00313	0.1164	37.1782	0.00391	0.2445	62.4636
LM_HOMCHL001414	0.10876	0.0823	0.7569	0.00246	0.0758	30.7857	0.05421	0.1127	2.0786	0.00486	0.1396	28.7417	0.00345	0.2507	72.6782
LM_HOMCHL001415	0.02633	0.1077	4.0922	0.06461	0.1283	1.9858	0.0603	0.1581	2.6218	0.00381	0.2081	54.6039	0.0027	0.1677	62.0992
LM_HOMCHL001427	0.00448	0.1197	26.7222	0.05083	0.1888	3.7143	0.00473	0.1756	37.0911	0.01364	0.352	25.8012	0.00422	0.2582	61.2141
LM_HOMCHL001433	0.10039	0.1412	1.4061	0.08288	0.1411	1.7024	0.11521	0.1946	1.6894	0.02718	0.1857	6.833	0.17425	0.2258	1.2959
LM_HOMCHL001434	0.08129	0.1152	1.4176	0.04689	0.2384	5.0837	0.06601	0.1384	2.0964	0.01938	0.2296	11.8472	0.00311	0.1699	54.6675
LM_HOMCHL001438	0.01514	0.0748	4.941	0.03183	0.0712	2.2379	0.07687	0.1488	1.936	0.00558	0.1761	31.533	0.00234	0.1082	46.188
LM_HOMCHL001443	0.05278	0.0527	0.9983	0.04168	0.0716	1.7173	0.0525	0.0976	1.86	0.02107	0.0922	4.3778	0.00152	0.1018	66.8451
LM_HOMCHL001445	0.04317	0.0961	2.2264	0.11042	0.1164	1.0544	0.05495	0.1298	2.3624	0.00346	0.1669	48.2866	0.01149	0.1197	10.4198
LM_HOMCHL001446	0.10633	0.1256	1.1816	0.00442	0.17	38.4725	0.06134	0.1557	2.538	0.0043	0.237	55.105	0.02122	0.2455	11.5701
LM_HOMCHL001451	0.05478	0.0805	1.47	0.06134	0.0747	1.2176	0.07895	0.082	1.0387	0.00721	0.1349	18.7255	0.00441	0.198	44.8595
LM_HOMCHL001460	0.13471	0.1367	1.0144	0.00531	0.1308	24.624	0.07468	0.119	1.5938	0.00443	0.1831	41.3185	0.0148	0.5377	36.334
LM_HOMCHL001467	0.01124	0.0988	8.7884	0.08699	0.11	1.264	0.00742	0.1125	15.1661	0.03923	0.3567	9.0943	0.00538	0.395	73.3696
LM_HOMCHL001471	0.11992	0.1073	0.8949	0.11845	0.156	1.3168	0.08056	0.1641	2.0367	0.05044	0.1716	3.4023	0.02797	0.2501	8.9437
LM_HOMCHL001474	0.1581	0.1023	0.6474	0.0143	0.1239	8.6669	0.07272	0.1211	1.6656	0.00396	0.1865	47.0517	0.00133	0.0655	49.4101
LM_HOMCHL001481	0.07349	0.1143	1.5554	0.07131	0.163	2.2862	0.0699	0.1953	2.7942	0.00554	0.1919	34.6415	0.0017	0.1104	64.7546
LM_HOMCHL001484	0.08019	0.0768	0.9578	0.041	0.066	1.6101	0.05176	0.0959	1.8523	0.00429	0.1329	30.9548	0.0584	0.0761	1.3026
LM_HOMCHL001498	0.01178	0.0778	6.6061	0.0461	0.1139	2.4709	0.02837	0.1117	3.9366	0.0034	0.1219	35.8308	0.00122	0.0673	55.3045
LM_HOMCHL001505	0.15623	0.0767	0.491	0.00235	0.0803	34.215	0.07786	0.1108	1.4231	0.00362	0.1289	35.5708	0.0024	0.1515	63.0309
LM_HOMCHL001506	0.11293	0.0613	0.543	0.06392	0.0922	1.4428	0.06888	0.0862	1.2516	0.00266	0.129	48.4256	0.01502	0.0726	4.8335
LM_HOMCHL001512	0.01117	0.0859	7.6884	0.03748	0.0594	1.5858	0.08807	0.1058	1.2015	0.00246	0.112	45.4945	0.01218	0.0861	7.0659
LM_HOMCHL001517	0.13795	0.1464	1.0612	0.00545	0.1546	28.3624	0.13115	0.1738	1.3249	0.00433	0.235	54.29	0.0821	0.1969	2.3979
LM_HOMCHL001526	0.04297	0.0772	1.7975	0.04701	0.1095	2.3294	0.06273	0.1755	2.7972	0.03141	0.4584	14.5925	0.00618	0.2589	41.9256
LM_HOMCHL001536	0.04473	0.0785	1.7546	0.054	0.0653	1.2101	0.04008	0.0923	2.3025	0.00698	0.1117	16.0163	0.0028	0.0819	29.229
LM_HOMCHL001539	0.11336	0.0646	0.5699	0.01244	0.1097	8.816	0.02927	0.1266	4.3264	0.00598	0.1781	29.7511	0.00232	0.1012	43.6091
LM_HOMCHL001550	0.08667	0.0589	0.6792	0.04554	0.069	1.515	0.06583	0.0787	1.1954	0.01898	0.167	8.8019	0.02968	0.1205	4.0563
LM_HOMCHL001552	0.12605	0.1228	0.9739	0.06805	0.188	2.7618	0.08364	0.1909	2.2827	0.00471	0.2433	51.6288	0.10851	0.1899	1.7495
LM_HOMCHL001556	0.18956	0.1459	0.7699	0.07132	0.1464	2.0527	0.09888	0.1693	1.7119	0.03294	0.2076	6.3027	0.00314	0.1855	59.0829
LM_HOMCHL001560	0.11589	0.0895	0.7719	0.08333	0.12	1.44	0.12174	0.3368	2.7668	0.01589	0.1552	9.7669	0.00709	0.3159	44.573
LM_HOMCHL001563	0.14801	0.1158	0.7826	0.11132	0.1235	1.1097	0.10952	0.1965	1.794	0.02016	0.1873	9.2887	0.02093	0.1806	8.6305
LM_HOMCHL001574	0.00383	0.079	20.6508	0.05593	0.0993	1.7751	0.01659	0.1774	10.6906	0.00464	0.1656	35.6604	0.00212	0.0822	38.6917
LM_HOMCHL001575	0.1137	0.0718	0.6317	0.03215	0.1213	3.7738	0.04589	0.1241	2.7035	0.00376	0.1213	32.2707	0.0439	0.0851	1.9383
LM_HOMCHL001577	0.00424	0.1093	25.8145	0.01717	0.1465	8.5296	0.00362	0.1546	42.6982	0.01917	0.3041	15.8655	0.00188	0.1114	59.3461
LM_HOMCHL001591	0.03991	0.0757	1.8969	0.08579	0.0943	1.0997	0.06383	0.1118	1.7519	0.1026	0.134	1.3062	0.01439	0.3122	21.6988
LM_HOMCHL001601	0.04617	0.0669	1.4489	0.02183	0.1084	4.9657	0.03245	0.1011	3.1146	0.00291	0.1253	43.14	0.00773	0.0957	12.3885
LM_HOMCHL001610	0.08752	0.0852	0.9733	0.06272	0.1123	1.791	0.04736	0.1171	2.4736	0.00937	0.1353	14.4419	0.00648	0.1084	16.738
LM_HOMCHL001616	0.03261	0.097	2.9741	0.02953	0.1126	3.8141	0.01244	0.1449	11.6511	0.01385	0.1382	9.9765	0.00263	0.1507	57.2314
LM_HOMCHL001619	0.10323	0.1071	1.0376	0.0918	0.1543	1.6812	0.08477	0.2285	2.695	0.00311	0.1525	49.0432	0.0392	0.1503	3.835
LM_HOMCHL001622	0.0046	0.1015	22.058	0.14551	0.0966	0.664	0.05203	0.2061	3.9614	0.0034	0.163	47.9561	0.00224	0.1201	53.5867
LM_HOMCHL001625	0.12745	0.1093	0.8577	0.02089	0.2041	9.7729	0.08229	0.146	1.7736	0.00407	0.1743	42.804	0.01148	0.1502	13.0925
LM_HOMCHL001629	0.13501	0.1061	0.7858	0.11854	0.1059	0.8936	0.13767	0.1427	1.0362	0.04576	0.1585	3.464	0.00213	0.1294	60.7245
LM_HOMCHL001630	0.07154	0.0517	0.7222	0.03417	0.0491	1.4372	0.05852	0.0748	1.2784	0.00174	0.0868	49.807	0.00145	0.0687	47.4049
LM_HOMCHL001633	0.09812	0.07	0.7138	0.02804	0.2471	8.8123	0.06152	0.0889	1.4456	0.00305	0.1633	53.5383	0.00268	0.1389	51.8092
LM_HOMCHL001637	0.04158	0.0488	1.1736	0.03261	0.1201	3.6824	0.03441	0.101	2.9354	0.00349	0.1434	41.0564	0.00563	0.3456	61.3455
LM_HOMCHL001640	0.19364	0.1045	0.5397	0.00463	0.1062	22.9521	0.04328	0.1719	3.9707	0.00469	0.1062	22.9521	0.00528	0.2604	49.2737
LM_HOMCHL001643	0.09844	0.0737	0.7491	0.01842	0.1159	6.2906	0.02325	0.0841	3.6165	0.00681	0.146	21.4554	0.00189	0.1091	57.6495
LM_HOMCHL001652	0.10446	0.1073	1.0271	0.07201	0.1055	1.4646	0.08402	0.1629	1.9393	0.11572	0.2261	1.9535	0.00356	0.2454	68.9337
LM_HOMCHL001655	0.0693	0.1265	1.825	0.06635	0.1536	2.3145	0.10551	0.2837	2.6887	0.00645	0.3428	53.1625	0.03501	0.1057	3.022
LM_HOMCHL001662	0.0067	0.108	16.1237	0.06941	0.2037	2.934	0.00463	0.1566	33.7845	0.00524	0.1899	36.2201	0.00397	0.1391	35.026
LM_HOMCHL001664	0.02778	0.1257	4.5243	0.05222	0.0852	1.6315	0.07141	0.1458	2.0413	0.02562	0.2607	10.1774	0.00236	0.1295	54.7912
LM_HOMCHL001668	0.00585	0.1016	17.3726	0.07902	0.1329	1.6824	0.0432	0.1515	3.5061	0.00457	0.1904	41.6319	0.00334	0.1933	57.8709
LM_HOMCHL001671	0.00704	0.1535	21.8013	0.05617	0.131	2.3319	0.03745	0.202	5.3946	0.0687	0.3066	4.462	0.00828	0.5497	66.408
LM_HOMCHL001672	0.05555	0.135	2.4312	0.03618	0.1654	4.5722	0.05718	0.3518	6.1515	0.06114	0.3287	5.3759	0.00551	0.3593	65.2181
LM_HOMCHL001674	0.00411	0.0978	23.8344	0.00458	0.1434	31.275	0.01213	0.2397	19.7521	0.004	0.2214	55.3655	0.00605	0.3583	59.1831
LM_HOMCHL001678	0.00612	0.1365	22.294	0.15733	0.167	1.0614	0.10202	0.2544	2.4934	0.00458	0.2201	48.0757	0.00377	0.2449	64.957
LM_HOMCHL001687	0.07971	0.0485	0.6089	0.00569	0.1092	19.1744	0.03014	0.0602	1.9986	0.00249	0.0495	19.8986	0.00852	0.0475	5.58
LM_HOMCHL001689	0.07455	0.078	1.0464	0.05806	0.078	1.3437	0.06784	0.1155	1.7022	0.01107	0.1413	12.766	0.00203	0.1228	60.5972
LM_HOMCHL001690	0.0055	0.0987	17.9376	0.0407	0.1024	2.5149	0.00653	0.2449	37.485	0.02623	0.4173	15.9113	0.00279	0.1741	62.3884
LM_HOMCHL001706	0.04631	0.0636	1.3739	0.03231	0.0671	2.0781	0.05115	0.0942	1.8419	0.00766	0.1255	16.3773	0.00448	0.3166	70.6365
LM_HOMCHL001716	0.00552	0.1333	24.1396	0.06162	0.1719	2.79	0.00624	0.2388	38.2592	0.01539	0.3275	21.2753	0.00749	0.211	28.158
LM_HOMCHL001722	0.03136	0.0743	2.3709	0.04575	0.0763	1.6673	0.03302	0.0849	2.5703	0.0129	0.1182	9.1661	0.00148	0.0462	31.3528
LM_HOMCHL001725	0.08171	0.065	0.7956	0.07381	0.0959	1.2988	0.05596	0.092	1.6433	0.0023	0.0964	41.9312	0.00363	0.0882	24.2452
LM_HOMCHL001726	0.00707	0.1227	17.3618	0.09305	0.1537	1.6523	0.00423	0.1714	40.541	0.00443	0.2794	63.1152	0.03481	0.3387	9.7313
LM_HOMCHL001727	0.0908	0.0871	0.9596	0.07522	0.1282	1.7047	0.0776	0.1215	1.5654	0.01208	0.1715	14.2022	0.00178	0.0822	46.2145
LM_HOMCHL001734	0.0837	0.0738	0.882	0.05792	0.0733	1.2659	0.06024	0.0903	1.5	0.00268	0.1135	42.356	0.00138	0.0725	52.4628
LM_HOMCHL001735	0.03206	0.0676	2.1072	0.03107	0.0848	2.7277	0.04132	0.1867	4.518	0.01156	0.1428	12.3494	0.00342	0.0869	25.4094
LM_HOMCHL001742	0.0034	0.076	22.3617	0.00255	0.0714	27.9672	0.01431	0.1951	13.6392	0.00461	0.195	42.3034	0.00227	0.1503	66.1543
LM_HOMCHL001751	0.08768	0.048	0.5471	0.03218	0.0537	1.6695	0.05748	0.0724	1.2598	0.00251	0.0894	35.5416	0.0012	0.0629	52.1865
LM_HOMCHL001754	0.04254	0.1094	2.5726	0.00327	0.116	35.459	0.0643	0.141	2.1935	0.02278	0.1786	7.8413	0.10597	0.1188	1.1211
LM_HOMCHL001758	0.05819	0.125	2.1477	0.12055	0.1867	1.5489	0.06906	0.2561	3.7093	0.2038	0.2304	1.1307	0.00738	0.4319	58.5184
LM_HOMCHL001762	0.00328	0.0795	24.2195	0.07035	0.1306	1.8567	0.07682	0.1504	1.9579	0.00555	0.2114	38.1083	0.00184	0.1217	66.2404
LM_HOMCHL001770	0.00615	0.1045	17.006	0.00754	0.0983	13.0274	0.01992	0.089	4.4673	0.00614	0.1045	17.006	0.02057	0.1375	6.6818
LM_HOMCHL001781	0.09124	0.0649	0.7118	0.04485	0.0743	1.6574	0.05365	0.2079	3.8759	0.00514	0.1006	19.5533	0.00225	0.1177	52.2482
LM_HOMCHL001782	0.00395	0.0889	22.5225	0.0321	0.0879	2.7385	0.01977	0.1288	6.5152	0.00413	0.153	37.0914	0.00282	0.1492	52.9273
LM_HOMCHL001790	0.05827	0.0846	1.4521	0.00492	0.1178	23.9398	0.06043	0.1563	2.5859	0.00318	0.1204	37.8389	0.00813	0.1533	18.8558
LM_HOMCHL001791	0.0057	0.1175	20.6196	0.1012	0.1888	1.8657	0.09709	0.216	2.2243	0.00478	0.2275	47.5553	0.02774	0.2392	8.6226
LM_HOMCHL001793	0.00437	0.1023	23.4131	0.12464	0.1385	1.1107	0.00448	0.1023	23.4131	0.00477	0.1283	26.905
LM_HOMCHL001805	0.00427	0.0882	20.6564	0.07679	0.0832	1.0836	0.05974	0.1305	2.1844	0.00554	0.1947	35.1439	0.00233	0.1449	62.2113
LM_HOMCHL001808	0.08768	0.0566	0.6456	0.07494	0.0667	0.8903	0.07735	0.0936	1.2102	0.00107	0.0574	53.5351	0.0008	0.0478	59.3987
LM_HOMCHL001813	0.07726	0.0587	0.7597	0.03628	0.0743	2.0486	0.04387	0.0743	1.6933	0.02721	0.2628	9.658	0.01645	0.0801	4.8705
LM_HOMCHL001817	0.00322	0.0667	20.6789	0.07468	0.0885	1.1851	0.03008	0.1041	3.4607	0.00403	0.1345	33.3884	0.0295	0.0859	2.9149
LM_HOMCHL001819	0.10795	0.0893	0.8271	0.09116	0.0923	1.0128	0.0852	0.1295	1.5202	0.00279	0.1206	43.1659	0.01622	0.1296	7.9916
LM_HOMCHL001824	0.00612	0.0965	15.7698	0.00557	0.143	25.6241	0.00419	0.1749	41.7014	0.00559	0.143	25.6241	0.02726	0.3463	12.7001
LM_HOMCHL001829	0.00788	0.079	10.0274	0.03196	0.0579	1.8108	0.03416	0.0577	1.6892	0.00293	0.1056	36.0524	0.02067	0.0756	3.6553
LM_HOMCHL001836	0.02843	0.1016	3.5731	0.04514	0.0979	2.1684	0.03583	0.0939	2.6188	0.00455	0.1774	38.979	0.00552	0.2676	48.5086
LM_HOMCHL001843	0.04767	0.0805	1.6895	0.07914	0.1125	1.4222	0.08079	0.1401	1.7342	0.02408	0.2093	8.69	0.00551	0.2597	47.1675
LM_HOMCHL001844	0.01058	0.1423	13.4477	0.08629	0.1408	1.6318	0.03353	0.1781	5.3109	0.00532	0.2151	40.4624	0.04007	0.2174	5.4262
LM_HOMCHL001855	0.09762	0.102	1.0449	0.04122	0.1236	2.9989	0.05865	0.1847	3.1483	0.01243	0.244	19.6268	0.00303	0.1466	48.4205
LM_HOMCHL001861	0.07241	0.0929	1.2835	0.02479	0.0878	3.5435	0.04366	0.1381	3.1627	0.03031	0.1955	6.448	0.00265	0.1406	53.0545
LM_HOMCHL001863	0.04591	0.0885	1.9286	0.1466	0.1445	0.9855	0.06245	0.166	2.6582	0.0727	0.2835	3.8991	0.0191	0.1701	8.9077
LM_HOMCHL001865	0.10143	0.1139	1.1233	0.05635	0.1081	1.918	0.1179	0.2035	1.7262	0.02955	0.1501	5.0803	0.01328	0.1113	8.381
LM_HOMCHL001867	0.09486	0.0818	0.8621	0.00166	0.0715	42.9651	0.04375	0.0932	2.1305	0.00257	0.1166	45.4149	0.00097	0.0544	56.304
LM_HOMCHL001875	0.12155	0.0701	0.5764	0.01233	0.1299	10.5383	0.06562	0.0984	1.4993	0.00293	0.1299	44.285	0.00254	0.1588	62.6137
LM_HOMCHL001877	0.00567	0.1224	21.5712	0.07514	0.1378	1.8343	0.0038	0.1699	44.8526	0.00377	0.1699	44.8526	0.00326	0.2	61.3527
LM_HOMCHL001882	0.04905	0.1136	2.3148	0.07457	0.0898	1.2045	0.04067	0.1378	3.3875	0.0331	0.1394	4.2112	0.00248	0.1628	65.6385
LM_HOMCHL001884	0.00586	0.09	15.3526	0.03518	0.0961	2.733	0.01562	0.0968	6.2016	0.00413	0.1693	41.0388	0.00316	0.1037	32.7876
LM_HOMCHL001885	0.04657	0.1196	2.5675	0.05332	0.1414	2.6524	0.05136	0.1774	3.4541	0.01692	0.2165	12.7946	0.00258	0.16	62.0647
LM_HOMCHL001890	0.00645	0.1277	19.7841	0.08324	0.1054	1.2658	0.00377	0.1378	36.5141	0.03197	0.1709	5.344	0.00865	0.335	38.7161
LM_HOMCHL001893	0.11215	0.0884	0.7879	0.06128	0.0944	1.5409	0.08976	0.1178	1.3129	0.0039	0.1653	42.327
LM_HOMCHL001895	0.00631	0.1323	20.9676	0.08331	0.1759	2.1118	0.00822	0.2771	33.7303	0.00473	0.2741	57.954	0.00505	0.2737	54.1725
LM_HOMCHL001896	0.03824	0.1298	3.3952	0.03717	0.1457	3.9206	0.04624	0.1555	3.3627	0.03695	0.3438	9.3043	0.0676	0.1913	2.8296
LM_HOMCHL001897	0.00195	0.0645	32.7056	0.00203	0.0645	32.7056	0.00178	0.0901	50.7169	0.00236	0.1066	45.1956	0.001	0.0635	63.6142
LM_HOMCHL001899	0.00827	0.1875	22.679	0.13592	0.2035	1.4971	0.01521	0.4737	31.1459
LM_HOMCHL001905	0.00922	0.1429	15.4926	0.10916	0.1342	1.2294	0.08968	0.2178	2.4289	0.00426	0.1779	41.7417
LM_HOMCHL001907	0.08574	0.0596	0.6955	0.04513	0.0562	1.2462	0.05941	0.0819	1.3792	0.00179	0.0814	45.5147	0.01281	0.0633	4.9364
LM_HOMCHL001909	0.01944	0.0941	4.8421	0.06651	0.111	1.6689	0.06206	0.1284	2.0689	0.00372	0.1967	52.8762	0.0035	0.0507	14.4958
LM_HOMCHL001912	0.02701	0.0679	2.5132	0.03189	0.0565	1.7705	0.03376	0.082	2.4299	0.01234	0.1322	10.7183	0.00193	0.0711	36.9656
LM_HOMCHL001914	0.0063	0.1092	17.3317	0.06683	0.119	1.7803	0.00392	0.143	36.5078	0.01234	0.1366	11.0756	0.11439	0.1768	1.5453
LM_HOMCHL001915	0.1078	0.1126	1.0448	0.04175	0.1575	3.771	0.07745	0.1785	2.3043	0.0064	0.1878	29.3623	0.00371	0.2249	60.6002
LM_HOMCHL001917	0.02274	0.0787	3.4592	0.00342	0.1201	35.0707	0.02571	0.1284	4.9934	0.00367	0.1685	45.969	0.00259	0.0537	20.6949
LM_HOMCHL001946	0.00794	0.1492	18.7873	0.14348	0.1904	1.3272	0.1011	0.2162	2.1382	0.00638	0.2539	39.8053
LM_HOMCHL001948	0.05082	0.0346	0.6816	0.03211	0.0296	0.923	0.02494	0.0384	1.5394	0.01532	0.0528	3.4467	0.01216	0.0324	2.6652
LM_HOMCHL001955	0.0762	0.0584	0.767	0.03271	0.071	2.1703	0.05133	0.0711	1.3862	0.00277	0.1193	43.0439	0.07416	0.0729	0.983
LM_HOMCHL001956	0.062	0.0889	1.4337	0.08282	0.1176	1.4206	0.07055	0.1633	2.3151	0.00586	0.3003	51.2025	0.00646	0.3848	59.5395
LM_HOMCHL001959	0.15364	0.0905	0.5891	0.03219	0.2115	6.5705	0.05187	0.1176	2.2673	0.00344	0.1282	37.308	0.01825	0.2376	13.0182
LM_HOMCHL001965	0.04548	0.1327	2.9172	0.06053	0.1097	1.8118	0.06168	0.1508	2.4443	0.00335	0.1819	54.3424	0.00894	0.5749	64.3385
LM_HOMCHL001972	0.07277	0.0965	1.3261	0.0669	0.1239	1.8518	0.10793	0.224	2.0756	0.00606	0.1469	24.267	0.31752	0.2858	0.9
LM_HOMCHL001981	0.15769	0.1244	0.7891	0.06202	0.1522	2.4546	0.04136	0.2495	6.0323	0.05404	0.2118	3.9198	0.0046	0.2491	54.1637
LM_HOMCHL001985	0.04888	0.1034	2.1158	0.09482	0.114	1.2017	0.08231	0.1438	1.747	0.00432	0.1312	30.3595
LM_HOMCHL001988	0.04614	0.1345	2.9158	0.07854	0.1183	1.5063	0.09204	0.1581	1.7175	0.00427	0.1848	43.2596	0.00214	0.1158	54.2348
LM_HOMCHL001995	0.02882	0.099	3.4349	0.05761	0.0905	1.5703	0.05292	0.1327	2.5084	0.02226	0.1337	6.0063	0.00125	0.0769	61.3087
LM_HOMCHL002007	0.1308	0.1103	0.8432	0.06551	0.0827	1.2619	0.08369	0.1047	1.2508	0.0848	0.0806	0.9508	0.00416	0.2316	55.6305
LM_HOMCHL002011	0.01812	0.0948	5.2318	0.03972	0.0905	2.2787	0.01801	0.1154	6.4067	0.00688	0.1427	20.7476	0.02431	0.1387	5.7054
LM_HOMCHL002021	0.00898	0.1691	18.8001	0.13288	0.1422	1.0703	0.00905	0.1691	18.8001	0.00564	0.3262	57.8155
LM_HOMCHL002024	0.10226	0.0876	0.8566	0.07708	0.1061	1.3766	0.06868	0.0763	1.1107	0.0024	0.108	44.9387	0.00449	0.184	41.0242
LM_HOMCHL002025	0.12593	0.0662	0.5254	0.00318	0.1172	36.863	0.06924	0.1376	1.9868	0.00754	0.156	20.6973	0.00293	0.1895	64.7458
LM_HOMCHL002033	0.0081	0.1332	16.4483	0.01523	0.3917	25.718	0.00642	0.2616	40.7492	0.00622	0.2785	44.7542	0.00392	0.2228	56.7662
LM_HOMCHL002040	0.08331	0.1883	2.2597	0.15701	0.1889	1.2031	0.16188	0.2456	1.5172	0.01039	0.369	35.518	0.03272	0.3318	10.1422
LM_HOMCHL002041	0.06071	0.0809	1.3324	0.03448	0.0749	2.1732	0.05353	0.1053	1.9673	0.0138	0.0991	7.177	0.01714	0.0768	4.4816
LM_HOMCHL002048	0.00698	0.1073	15.3675	0.00378	0.1256	33.22	0.00653	0.1808	27.6796	0.0959	0.235	2.4504	0.00356	0.1976	55.4832
LM_HOMCHL002051	0.00704	0.15	21.297	0.09895	0.1657	1.6746	0.00465	0.2204	47.3521	0.00466	0.2204	47.3521
LM_HOMCHL002053	0.01052	0.1566	14.8867	0.00423	0.1709	40.3829	0.00814	0.2265	27.8207	0.00433	0.2271	52.3907	0.00958	0.1669	17.4329
LM_HOMCHL002062	0.08837	0.0593	0.6706	0.03281	0.0663	2.0205	0.06037	0.1186	1.9646	0.00405	0.2595	64.1131	0.00119	0.0764	64.2477
LM_HOMCHL002074	0.10309	0.1067	1.0351	0.05011	0.1355	2.7031	0.03703	0.1634	4.4122	0.00649	0.1832	28.2387	0.16122	0.1588	0.9853
LM_HOMCHL002097	0.00326	0.1178	36.2887	0.02049	0.1174	5.7315	0.00325	0.1178	36.2887	0.08919	0.1282	1.4368	0.00137	0.0812	59.1022
LM_HOMCHL002099	0.16579	0.1188	0.7167	0.03254	0.1659	5.0985	0.08899	0.2994	3.364	0.01029	0.183	17.792	0.00229	0.1129	49.2786
LM_HOMCHL002103	0.08838	0.0962	1.0886	0.04666	0.0824	1.7653	0.05694	0.1198	2.104	0.00283	0.1278	45.2399	0.0028	0.1278	45.2399
LM_HOMCHL002112	0.00796	0.1521	19.0724	0.02998	0.1641	5.4732	0.04611	0.1326	2.8765	0.00804	0.1521	19.0724	0.00163	0.0863	52.8105
LM_HOMCHL002113	0.00547	0.1276	23.3428	0.07308	0.1281	1.7522	0.0793	0.1587	2.0014	0.00409	0.1946	47.6278	0.00235	0.1347	57.3135
LM_HOMCHL002115	0.04677	0.1318	2.8176	0.04896	0.1205	2.4613	0.06594	0.1714	2.5988	0.01293	0.3022	23.3795	0.00463	0.2828	61.1295
LM_HOMCHL002129	0.08487	0.0646	0.761	0.0637	0.0741	1.1634	0.03272	0.17	5.1963	1.00547			0.00257	0.1669	64.9229
LM_HOMCHL002131	0.09007	0.08	0.8886	0.02898	0.065	2.2434	0.04865	0.1052	2.1631	0.00185	0.0658	35.558	0.00211	0.1411	66.8359
LM_HOMCHL002132	0.15666	0.0945	0.6031	0.06262	0.1401	2.2366	0.08399	0.178	2.1187	0.0065	0.1434	22.0709	0.00303	0.1974	65.1864
LM_HOMCHL002134	0.09503	0.1329	1.3988	0.11078	0.1177	1.0623	0.08224	0.1545	1.8791	0.00278	0.105	37.7779	0.02653	0.1375	5.1826
LM_HOMCHL002148	0.03865	0.0636	1.646	0.02613	0.0215	0.8241	0.01466	0.0624	4.2533	0.00109	0.0413	37.7194	0.00456	0.0385	8.4537
LM_HOMCHL002150	0.00464	0.122	26.2603	0.00486	0.172	35.7221	0.00497	0.1168	24.0107	0.00481	0.172	35.7221	0.00942	0.1612	17.1156
LM_HOMCHL002174	0.03912	0.0412	1.0539	0.01498	0.0531	3.5473	0.01638	0.0495	3.0215	0.00187	0.0903	48.3832	0.03714	0.0635	1.7097
LM_HOMCHL002176	0.02687	0.0948	3.5285	0.04607	0.0737	1.5988	0.05742	0.1079	1.8798	0.0078	0.1361	17.4535	0.00171	0.0735	42.95
LM_HOMCHL002181	0.09157	0.1005	1.0979	0.04889	0.1043	2.1332	0.09182	0.1776	1.9341	0.0123	0.1549	12.5948	0.00299	0.1952	65.2452
LM_HOMCHL002186	0.00745	0.1156	15.5009	0.09936	0.1866	1.8781	0.00407	0.1486	36.5368	0.0038	0.2002	52.6204	0.01327	0.181	13.6435
LM_HOMCHL002189	0.05042	0.0662	1.3125	0.01604	0.0725	4.5179	0.02307	0.0572	2.4799	0.00898	0.0816	9.0858	0.00416	0.0398	9.5719
LM_HOMCHL002190	0.00361	0.0824	22.8567	0.03671	0.0847	2.3064	0.01587	0.1722	10.8461	0.00278	0.131	47.1104	0.00583	0.4049	69.5029
LM_HOMCHL002193	0.00758	0.1445	19.0542	0.0729	0.1171	1.606	0.07859	0.2489	3.1666	0.1482	0.3371	2.2746	0.00528	0.337	63.8467
LM_HOMCHL002195	0.12236	0.1296	1.0595	0.09864	0.1239	1.2558	0.13456	0.2064	1.5339	0.01395	0.1936	13.8758	0.00493	0.2124	43.0801
LM_HOMCHL002199	0.06844	0.0593	0.8662	0.06385	0.0748	1.1709	0.07687	0.2013	2.619	0.0891	0.1154	1.2951	0.02185	0.0743	3.3998
LM_HOMCHL002200	0.03687	0.0983	2.6651	0.09597	0.1201	1.2514	0.0367	0.1678	4.5736	0.01412	0.2447	17.3308	0.00432	0.2914	67.4922
LM_HOMCHL002201	0.00538	0.0934	17.3757	0.00739	0.123	16.6453	0.00357	0.1375	38.5467	0.00334	0.1433	42.8672	0.00379	0.257	67.884
LM_HOMCHL002204	0.00725	0.0596	8.2219	0.00605	0.0881	14.5725	0.01908	0.0474	2.4822	0.03891	0.0987	2.5354	0.01068	0.1482	13.8796
LM_HOMCHL002217	0.00655	0.119	18.1718	0.11181	0.1207	1.0796	0.07084	0.1941	2.741	0.00706	0.4801	68.042	0.00667	0.119	18.1718
LM_HOMCHL002226	0.00685	0.1127	16.4624	0.0529	0.283	5.3488	0.00507	0.1683	33.1794	0.00451	0.2412	53.4683	0.00569	0.3306	58.1427
LM_HOMCHL002228	0.02464	0.1016	4.1231	0.01782	0.1196	6.7125	0.04228	0.1631	3.8562	0.02323	0.2651	11.4164	0.00318	0.1891	59.4998
LM_HOMCHL002232	0.09741	0.0515	0.5291	0.03064	0.0584	1.9067	0.0574	0.0918	1.5996	0.00212	0.1063	50.146	0.03984	0.0543	1.3629
LM_HOMCHL002236	0.05827	0.1072	1.8397	0.02098	0.1329	6.3346	0.09661	0.2503	2.5904	0.04176	0.3001	7.1862	0.1755	0.2073	1.1814
LM_HOMCHL002237	0.23985	0.1426	0.5943	0.09348	0.2032	2.1737	0.17292	0.2374	1.3724	0.01683	0.2334	13.8675	0.00582	0.3913	67.2431
LM_HOMCHL002240	0.00573	0.1317	22.9601	0.03264	0.1726	5.2868	0.00773	0.264	34.138	0.00511	0.2336	45.6967	0.00692	0.4578	66.1287
LM_HOMCHL002248	0.00521	0.1073	20.5993	0.06102	0.1456	2.3867	0.05424	0.1697	3.1291	0.00291	0.1568	53.9453	0.05841	0.1335	2.2854
LM_HOMCHL002254	0.04162	0.073	1.7544	0.05484	0.0544	0.9915	0.03623	0.2261	6.2415	0.03443	0.0893	2.5936	0.01562	0.1015	6.4955
LM_HOMCHL002257	0.00472	0.0885	18.7707	0.00491	0.1071	21.8048	0.00361	0.1477	40.9141	0.00291	0.1503	51.64	0.00243	0.1603	65.975
LM_HOMCHL002260	0.00329	0.0616	18.7352	0.03761	0.0645	1.715	0.02671	0.0936	3.5033	0.03599	0.1039	2.8858	0.00193	0.1062	55.1116
LM_HOMCHL002261	0.03346	0.0598	1.7856	0.01374	0.0781	5.6885	0.0266	0.068	2.5572	0.00279	0.1548	55.3975	0.00349	0.1669	47.8798
LM_HOMCHL002263	0.08991	0.0542	0.6027	0.0136	0.0597	4.3881	0.04438	0.0938	2.1141	0.00253	0.0817	32.3293	0.00196	0.0692	35.2362
LM_HOMCHL002264	0.00765	0.1475	19.2648	0.0972	0.1568	1.6133	0.12559	0.2332	1.857	0.01181	0.249	21.0845	0.0045	0.2035	45.1879
LM_HOMCHL002267	0.10296	0.0798	0.7755	0.05089	0.0969	1.9037	0.03676	0.1174	3.1952	0.00242	0.1381	57.0974	0.00182	0.0972	53.4168
LM_HOMCHL002271	0.00836	0.142	16.9746	0.00563	0.1742	30.9279	0.05768	0.3666	6.3561	0.00638	0.2238	35.0671	0.00797	0.5039	63.2536
LM_HOMCHL002272	0.05931	0.1092	1.8415	0.03839	0.2644	6.8877	0.08336	0.1064	1.2759	0.00504	0.2144	42.5435	0.05746	0.1158	2.0141
LM_HOMCHL002277	0.03456	0.0898	2.5973	0.10771	0.0997	0.9254	0.07646	0.1805	2.3609	0.00374	0.1389	37.1197	0.33835	0.7389	2.1839
LM_HOMCHL002278	0.04981	0.1178	2.3652	0.00277	0.11	39.6713	0.07599	0.2713	3.5698	0.03923	0.2885	7.3544	0.02724	0.1878	6.8927
LM_HOMCHL002280	0.04753	0.1207	2.5396	0.04791	0.1165	2.4311	0.06752	0.1522	2.2539	0.00588	0.1936	32.9263	0.00522	0.1652	31.6315
LM_HOMCHL002286	0.05299	0.068	1.2824	0.03022	0.068	2.2488	0.02798	0.0767	2.7418	0.00189	0.0878	46.4662	0.00462	0.0447	9.6838
LM_HOMCHL002288	0.09513	0.0573	0.6025	0.03633	0.0696	1.9155	0.05319	0.0972	1.8267	0.0154	0.0638	4.1432	0.01056	0.0304	2.8743
LM_HOMCHL002293	0.09822	0.1078	1.0974	0.094	0.1286	1.3684	0.10511	0.1704	1.621	0.00456	0.1586	34.7676	0.07278	0.1827	2.5105
LM_HOMCHL002303	0.03225	0.0987	3.0609	0.03198	0.1122	3.5094	0.04799	0.143	2.9795	0.01838	0.1349	7.3389	0.00292	0.163	55.7889
LM_HOMCHL002305	0.00486	0.1318	27.1451	0.02766	0.1196	4.3251	0.00897	0.2314	25.8107	0.1285	0.2898	2.2555	0.0032	0.1932	60.3272
LM_HOMCHL002306	0.01325	0.0732	5.5239	0.05819	0.0699	1.2008	0.04159	0.0846	2.0334	0.04486	0.1522	3.3935	0.00208	0.1319	63.4698
LM_HOMCHL002310	0.06678	0.1266	1.8954	0.04276	0.1205	2.8174	0.02623	0.1483	5.6534	0.01091	0.289	26.4982	0.00444	0.133	29.9189
LM_HOMCHL002313	0.12845	0.0939	0.7309	0.01778	0.1536	8.6367	0.07298	0.1554	2.1288	0.01672	0.1974	11.8079	0.02432	0.2956	12.1555
LM_HOMCHL002317	0.02336	0.1037	4.4378	0.00353	0.0996	28.2224	0.02481	0.1431	5.7668	0.00383	0.1629	42.5295	0.00688	0.0963	13.9937
LM_HOMCHL002324	0.08421	0.0762	0.9045	0.08823	0.0883	1.0007	0.01669	0.1106	6.6254	0.00284	0.1622	57.0362	0.00388	0.2665	68.6693
LM_HOMCHL002327	0.00399	0.1047	26.2178	0.00556	0.1499	26.9814	0.00364	0.1575	43.2532	0.00776	0.5025	64.7525	0.03951	0.2328	5.8926
LM_HOMCHL002338	0.03722	0.1345	3.6148	0.03235	0.116	3.585	0.05798	0.1957	3.3755	0.0208	0.2168	10.4241
LM_HOMCHL002340	0.10759	0.1207	1.122	0.04031	0.1568	3.8903	0.10836	0.198	1.827	0.02456	0.2092	8.5179	0.00354	0.1764	49.8468
LM_HOMCHL002347	0.05282	0.0982	1.8595	0.04611	0.0912	1.9771	0.02134	0.1453	6.81	0.00459	0.1658	36.0807	0.03564	0.4388	12.3121
LM_HOMCHL002361	0.09475	0.0912	0.9624	0.00469	0.1467	31.2861	0.12239	0.2023	1.6531	0.00387	0.1681	43.4846	0.00156	0.0759	48.5709
LM_HOMCHL002363	0.00425	0.0767	18.0175	0.04622	0.1348	2.9156	0.06716	0.1011	1.5049	0.00443	0.2155	48.6117	0.00251	0.1442	57.4582
LM_HOMCHL002365	0.00624	0.1015	16.2622	0.10459	0.1268	1.2121	0.00556	0.2129	38.1796	0.00563	0.2129	38.1796
LM_HOMCHL002366	0.02138	0.0605	2.8282	0.07526	0.0914	1.2145	0.0237	0.097	4.0946	0.00216	0.0732	33.8377	0.00321	0.174	54.1918
LM_HOMCHL002380	0.14572	0.1415	0.9713	0.00469	0.1973	41.88	0.04659	0.2278	4.8888	0.00473	0.1973	41.88	0.00329	0.2107	63.9467
LM_HOMCHL002381	0.00592	0.0988	16.6988	0.0263	0.0489	1.861	0.03976	0.0961	2.4166	0.00359	0.1357	37.816	0.00248	0.0915	36.8307
LM_HOMCHL002387	0.00725	0.1318	18.1803	0.07104	0.1113	1.5668	0.04874	0.2755	5.6526	0.00734	0.3637	49.5403	0.01041	0.668	64.1922
LM_HOMCHL002400	0.09813	0.1491	1.5191	0.09953	0.1491	1.4984	0.09103	0.3413	3.7496	0.00845	0.1813	21.461	0.04032	0.196	4.8603
LM_HOMCHL002401	0.00495	0.1198	24.1879	0.08195	0.1527	1.864	0.00404	0.186	46.0088	0.00543	0.2117	38.9661
LM_HOMCHL002412	0.00656	0.1501	22.863	0.13993	0.1288	0.9202	0.08871	0.1792	2.0206	0.00567	0.162	28.5838	0.0263	0.1439	5.4698
LM_HOMCHL002414	0.07238	0.0677	0.9351	0.04388	0.094	2.1428	0.0505	0.1009	1.9982	0.00552	0.1157	20.9736	0.002	0.1064	53.2729
LM_HOMCHL002417	0.00683	0.1191	17.439	0.00966	0.1422	14.7186	0.00608	0.1816	29.8817	0.00726	0.175	24.1078
LM_HOMCHL002424	0.14511	0.1467	1.011	0.02462	0.1308	5.31	0.08927	0.179	2.0051	0.00615	0.239	38.8916	0.10062	0.1757	1.7466
LM_HOMCHL002425	0.00831	0.1323	15.9255	0.00527	0.1379	26.1417	0.01607	0.2009	12.5008	0.00515	0.222	43.1381	0.0046	0.189	41.0656
LM_HOMCHL002428	0.05877	0.0588	1	0.04581	0.0454	0.9901	0.04488	0.0819	1.8247	0.02793	0.1051	3.7651	0.00105	0.0542	51.8205
LM_HOMCHL002432	0.00649	0.1603	24.6847	0.14359	0.3523	2.4536	0.00778	0.2845	36.5639	0.02785	0.2776	9.9656	0.00261	0.1579	60.5776
LM_HOMCHL002433	0.00619	0.0705	11.3859	0.02468	0.078	3.1603	0.05126	0.1253	2.4449	0.0127	0.1135	8.9378	0.03691	0.0955	2.5873
LM_HOMCHL002436	0.04138	0.1432	3.4611	0.07062	0.1222	1.7302	0.06813	0.1806	2.6515	0.00459	0.1777	38.7415	0.00176	0.1023	58.1778
LM_HOMCHL002441	0.0043	0.1038	24.1658	0.00491	0.1273	25.9548	0.00419	0.1734	41.4248	0.00599	0.2241	37.3846	0.00268	0.1313	49.0094
LM_HOMCHL002471	0.00769	0.1192	15.5066	0.01154	0.1191	10.3188	0.00402	0.1828	45.4903	0.26213	0.2769	1.0563	0.00612	0.3832	62.6535
LM_HOMCHL002482	0.00919	0.1343	14.6071	0.07369	0.142	1.9274	0.00695	0.2414	34.7127	0.00658	0.2359	35.8703	0.05658	0.1541	2.7233
LM_HOMCHL002488	0.0477	0.0988	2.0721	0.00202	0.1083	53.7133	0.03967	0.1474	3.7148	0.0027	0.176	65.1542	0.02123	0.1765	8.315
LM_HOMCHL002489	0.01684	0.0713	4.2302	0.04904	0.0574	1.1703	0.05602	0.0969	1.7293	0.00569	0.0829	14.5604	0.00111	0.0659	59.2017
LM_HOMCHL002492	0.14419	0.0805	0.5586	0.00217	0.0969	44.6903	0.077	0.1797	2.3333	0.00313	0.1409	44.9446	0.00217	0.0969	44.6903
LM_HOMCHL002493	0.06659	0.0769	1.1546	0.00198	0.1059	53.4179	0.05383	0.1552	2.8838	0.00458	0.1681	36.7086	0.04196	0.1644	3.9193
LM_HOMCHL002496	0.04422	0.0986	2.2307	0.04823	0.1024	2.1237	0.04892	0.1402	2.867	0.0037	0.1577	42.5888	0.0022	0.1407	63.802
LM_HOMCHL002497	0.00568	0.0915	16.111	0.05682	0.1443	2.5392	0.00534	0.1717	32.1764	0.0048	0.265	55.1933	0.00424	0.2116	49.886
LM_HOMCHL002498	0.01793	0.0742	4.14	0.02406	0.072	2.9934	0.02302	0.12	5.2127	0.02845	0.1446	5.0804	0.02194	0.057	2.6002
LM_HOMCHL002512	0.10908	0.0944	0.8658	0.10768	0.1153	1.0707	0.09507	0.168	1.7672	0.003	0.1392	46.3732	0.00225	0.1413	62.8392
LM_HOMCHL002517	0.02112	0.0877	4.1535	0.04128	0.0979	2.3732	0.04182	0.1517	3.6266	0.006	0.2477	41.2572	0.00281	0.1633	58.008
LM_HOMCHL002521	0.00496	0.1013	20.4014	0.04672	0.1194	2.5549	0.00383	0.1573	41.0855	0.00391	0.1722	44.077	0.0271	0.3425	12.6401
LM_HOMCHL002522	0.00718	0.1426	19.8548	0.02861	0.1358	4.7486	0.03473	0.2544	7.3227	0.00975	0.6494	66.6399
LM_HOMCHL002527	0.00763	0.1176	15.4146	0.00577	0.1434	24.8655	0.00526	0.2095	39.8199	0.04294	0.1783	4.1532
LM_HOMCHL002528	0.04683	0.1175	2.5098	0.02723	0.1339	4.9169	0.03778	0.125	3.3079	0.00359	0.1613	44.9446	0.00295	0.1528	51.812
LM_HOMCHL002532	0.0153	0.097	6.342	0.08739	0.0916	1.0484	0.07991	0.1289	1.6132	0.0026	0.0823	31.6662	0.0034	0.2125	62.5735
LM_HOMCHL002536	0.00424	0.1053	24.8671	0.00345	0.2074	61.24	0.00377	0.1548	41.027	0.00361	0.1489	41.2261	0.00339	0.2074	61.24
LM_HOMCHL002546	0.13361	0.1114	0.8341	0.0796	0.1511	1.898	0.1037	0.1522	1.4683	0.079	0.1668	2.1117	0.00279	0.1492	53.4609
LM_HOMCHL002547	0.01041	0.1602	15.3904	0.0129	0.1983	15.374	0.00701	0.2438	34.7987	0.00734	0.3794	51.6689	0.00648	0.3934	60.6897
LM_HOMCHL002548	0.01363	0.0688	5.0491	0.0238	0.0489	2.0549	0.02235	0.073	3.2675	0.00131	0.0828	63.1954	0.00084	0.0432	51.1889
LM_HOMCHL002552	0.00507	0.0875	17.2459	0.02585	0.0754	2.9179	0.0604	0.1044	1.7286	0.00703	0.2407	34.2339	0.04368	0.1783	4.0813
LM_HOMCHL002553	0.11538	0.1068	0.9258	0.05927	0.1456	2.4558	0.06515	0.2027	3.1111	0.01855	0.2474	13.337	0.00333	0.2	60.02
LM_HOMCHL002554	0.09884	0.0961	0.9726	0.00459	0.1269	27.6512	0.09903	0.1616	1.6316	0.00415	0.1659	39.9369	0.0034	0.2104	61.8091
LM_HOMCHL002563	0.06917	0.1233	1.7822	0.06394	0.1374	2.1491	0.11092	0.1796	1.619	0.00466	0.2382	51.1475
LM_HOMCHL002567	0.00606	0.1369	22.5881	0.00745	0.1817	24.3982	0.0052	0.1919	36.9077	0.00494	0.2028	41.0862	0.00215	0.1092	50.8592
LM_HOMCHL002570	0.00588	0.1355	23.0336	0.00558	0.2134	38.2565	0.01	0.1914	19.1298	0.00596	0.1355	23.0336	0.00669	0.3326	49.7143
LM_HOMCHL002574	0.00708	0.15	21.1889	0.05046	0.1195	2.3685	0.00473	0.2238	47.2628	0.00776	0.3438	44.322
LM_HOMCHL002584	0.00539	0.12	22.2621	0.00559	0.1438	25.7265	0.00575	0.1685	29.3018	0.00416	0.2662	64.0207	0.05032	0.169	3.3589
LM_HOMCHL002595	0.02492	0.0898	3.6023	0.01423	0.1256	8.8306	0.04236	0.1434	3.3843	0.00347	0.2208	63.6403	0.0191	0.0912	4.7789
LM_HOMCHL002602	0.00926	0.1551	16.7542	0.02602	0.2588	9.945	0.00595	0.2874	48.8	0.00589	0.2874	48.8	0.10105	0.1373	1.3589
LM_HOMCHL002606	0.01109	0.1501	13.526	0.09827	0.1112	1.132	0.10326	0.2685	2.6004	0.02596	0.2019	7.7775
LM_HOMCHL002613	0.02838	0.0765	2.696	0.07944	0.0964	1.2132	0.05094	0.1016	1.9945	0.08871	0.1652	1.8622	0.00245	0.1261	51.5061
LM_HOMCHL002615	0.00671	0.1461	21.7699	0.00581	0.196	33.7395	0.02325	0.1815	7.805	0.00487	0.2324	47.6815
LM_HOMCHL002622	0.00521	0.1344	25.8289	0.0505	0.1362	2.6976	0.00581	0.2371	40.817	0.00518	0.1344	25.8289	0.00613	0.4126	67.3537
LM_HOMCHL002623	0.00698	0.1487	21.3252	0.11266	0.1806	1.6033	0.04582	0.2271	4.9575	0.00629	0.2142	34.0827
LM_HOMCHL002627	0.0894	0.1011	1.1307	0.06362	0.114	1.7921	0.05326	0.121	2.2713	0.02135	0.164	7.6815	0.01265	0.1179	9.3232
LM_HOMCHL002630	0.03769	0.0802	2.1281	0.04585	0.0957	2.0866	0.05953	0.1435	2.4099	0.00397	0.2011	50.6751	0.00275	0.1411	51.3492
LM_HOMCHL002639	0.00726	0.1399	19.2774	0.0633	0.0975	1.5406	0.07486	0.2047	2.735	0.00998	0.6304	63.1581
LM_HOMCHL002641	0.00484	0.1303	26.907	0.01086	0.2459	22.6492	0.00535	0.2513	46.9762	0.00825	0.3162	38.3043
LM_HOMCHL002642	0.00475	0.1116	23.5043	0.09721	0.1535	1.5791	0.00636	0.1864	29.2895	0.00477	0.1116	23.5043	0.00316	0.187	59.0971
LM_HOMCHL002650	0.17317	0.122	0.7043	0.04908	0.1472	2.9996	0.13122	0.2322	1.7698	0.05905	0.3292	5.575	0.03804	0.0627	1.6494
LM_HOMCHL002651	0.02633	0.0934	3.5474	0.04669	0.1004	2.1503	0.04173	0.1241	2.9745	0.00303	0.1134	37.452	0.00211	0.1163	55.1899
LM_HOMCHL002653	0.0444	0.2104	4.7391	0.04347	0.175	4.025	0.02731	0.213	7.8016	0.00945	0.5662	59.9249	0.19	0.525	2.7629
LM_HOMCHL002656	0.0056	0.0899	16.0659	0.03681	0.0748	2.0328	0.03461	0.0838	2.4218	0.00814	0.1139	13.9868	0.03068	0.1857	6.0511
LM_HOMCHL002657	0.04141	0.1089	2.6304	0.00432	0.1389	32.1866	0.11915	0.2059	1.7277	0.00494	0.3376	68.298	0.00636	0.4328	67.9972
LM_HOMCHL002670	0.10795	0.1017	0.9424	0.01301	0.0886	6.8056	0.0446	0.1242	2.7859	0.00632	0.133	21.0335	0.00306	0.0813	26.5659
LM_HOMCHL002671	0.07409	0.1135	1.5325	0.00322	0.1358	42.1849	0.11343	0.1648	1.4525	0.01206	0.1677	13.9117
LM_HOMCHL002675	0.00727	0.1695	23.3041	0.09844	0.19	1.93	0.01052	0.3096	29.433	0.00622	0.2974	47.8131	0.00413	0.2557	61.9719
LM_HOMCHL002678	0.01264	0.0747	5.9078	0.00309	0.124	41.1055	0.07955	0.1157	1.4545	0.00302	0.124	41.1055	0.0027	0.1549	57.4273
LM_HOMCHL002685	0.01059	0.1071	10.1095	0.0072	0.0722	10.0266	0.02738	0.1623	5.9283	0.00693	0.17	24.5387	0.00903	0.1866	20.67
LM_HOMCHL002690	0.01275	0.1648	12.9259	0.04426	0.1767	3.9912	0.02145	0.2504	11.6745	0.00656	0.359	54.7077
LM_HOMCHL002692	0.00469	0.1915	41.8762	0.06627	0.0901	1.3594	0.0569	0.2155	3.7877	0.01816	0.3464	19.0785	0.00457	0.1915	41.8762
LM_HOMCHL002708	0.00633	0.1288	20.3666	0.07725	0.235	3.0414	0.00818	0.245	29.9497	0.00577	0.2724	47.2015
LM_HOMCHL002719	0.00601	0.1664	27.7046	0.08301	0.176	2.12	0.00907	0.2543	28.0333	0.00599	0.1664	27.7046
LM_HOMCHL002732	0.05623	0.0644	1.1454	0.06368	0.0778	1.2218	0.04108	0.0934	2.2729	0.00529	0.1486	28.0871	0.06472	0.0921	1.4227
LM_HOMCHL002734	0.0079	0.1491	18.8766	0.02642	0.1273	4.8162	0.00938	0.2083	22.2052	0.00961	0.2914	30.3254
LM_HOMCHL002735	0.06631	0.1044	1.574	0.08564	0.1023	1.1952	0.06891	0.15	2.1762	0.01392	0.1303	9.3583	0.10555	0.1825	1.7294
LM_HOMCHL002737	0.00618	0.0948	15.3574	0.00654	0.1681	25.6853	0.00385	0.135	35.0458	0.00672	0.1977	29.4126	0.0984	0.1951	1.9827
LM_HOMCHL002741	0.00715	0.1528	21.3833	0.09132	0.2528	2.7686	0.01419	0.3622	25.5265	0.00404	0.0959	23.747	0.31218	0.4128	1.3223
LM_HOMCHL002742	0.0051	0.1029	20.1767	0.00542	0.1718	31.7205	0.00775	0.2184	28.1918	0.0376	0.3488	9.2754
LM_HOMCHL002744	0.00888	0.1726	19.4279	0.02434	0.1291	5.3024	0.00868	0.2383	27.462	0.01967	0.1798	9.1425
LM_HOMCHL002749	0.04484	0.1152	2.5688	0.05201	0.0945	1.8166	0.02808	0.1402	4.9928	0.06515	0.2425	3.723	0.11328	0.4649	4.1036
LM_HOMCHL002750	0.04845	0.1683	3.4748	0.08552	0.1375	1.6079	0.14273	0.2392	1.6759	0.00679	0.2649	39.0254	0.01294	0.3938	30.4333
LM_HOMCHL002753	0.00921	0.1237	13.4326	0.00793	0.1067	13.4593	0.00836	0.1939	23.1898	0.0073	0.1451	19.8856	0.00402	0.1691	42.0315
LM_HOMCHL002755	0.00711	0.1202	16.9067	0.0803	0.1482	1.8453	0.02284	0.1781	7.7975	0.00401	0.1992	49.7078
LM_HOMCHL002759	0.14103	0.1833	1.2994	0.10669	0.1462	1.3706	0.1232	0.1946	1.5798	0.0071	0.2028	28.5596	0.06795	0.1547	2.2778
LM_HOMCHL002760	0.10888	0.134	1.2308	0.10518	0.1454	1.382	0.18084	0.1987	1.0985	0.07824	0.2779	3.5515	0.00335	0.1428	42.6448
LM_HOMCHL002762	0.0058	0.1124	19.3805	0.01297	0.1637	12.6268	0.00335	0.1414	42.1655	0.09445	0.1614	1.709	0.01352	0.2064	15.2662
LM_HOMCHL002771	0.05267	0.0914	1.7357	0.02818	0.094	3.3342	0.04065	0.1169	2.8749	0.00198	0.1107	55.8878	0.00135	0.0735	54.5195
LM_HOMCHL002773	0.00541	0.1147	21.2071	0.10797	0.1345	1.2455	0.06445	0.2005	3.1106	0.00445	0.1744	39.1717	0.00823	0.3805	46.2646
LM_HOMCHL002778	0.01655	0.122	7.3686	0.03599	0.1796	4.9905	0.02132	0.1276	5.9886	0.00649	0.4095	63.111	0.00249	0.1503	60.4978
LM_HOMCHL002779	0.01632	0.1038	6.3624	0.06424	0.0824	1.2831	0.04548	0.1446	3.179	0.00326	0.1343	41.2053	0.00209	0.1164	55.8194
LM_HOMCHL002784	0.00567	0.1354	23.8579	0.11164	0.1416	1.2681	0.08215	0.2085	2.5372	0.00598	0.3787	63.2929	0.00174	0.0897	51.376
LM_HOMCHL002800	0.17971	0.1041	0.5793	0.04883	0.1177	2.4108	0.0907	0.1606	1.7706	0.00539	0.2502	46.4558	0.00358	0.2408	67.2014
LM_HOMCHL002802	0.00832	0.1318	15.8346	0.10707	0.1595	1.4893	0.0045	0.2255	50.1569	0.00518	0.2968	57.2839	0.00322	0.1908	59.3059
LM_HOMCHL002809	0.00545	0.0997	18.2834	0.00442	0.1184	26.8085	0.00426	0.1469	34.4671	0.00358	0.1409	39.3333	0.00212	0.1425	67.0723
LM_HOMCHL002816	0.00584	0.1246	21.3373	0.00438	0.1649	37.6351	0.00535	0.2089	39.051	0.02926	0.3809	13.0147	0.00284	0.1698	59.7722
LM_HOMCHL002819	0.00808	0.1731	21.4179	0.10981	0.2576	2.3459	0.08762	0.2478	2.8281	0.0053	0.2488	46.9723
LM_HOMCHL002824	0.03522	0.1068	3.0331	0.04508	0.1743	3.866	0.05485	0.1236	2.2534	0.00396	0.208	52.4717	0.05185	0.1227	2.3657
LM_HOMCHL002831	0.12726	0.1339	1.052	0.07226	0.1449	2.0055	0.10951	0.2142	1.956	0.08018	0.2093	2.6105	0.02693	0.2447	9.0877
LM_HOMCHL002834	0.04474	0.0641	1.4328	0.04422	0.0823	1.8617	0.03679	0.1062	2.8865	0.00257	0.1134	44.1391	0.00146	0.0825	56.344
LM_HOMCHL002835	0.00424	0.0955	22.5019	0.00595	0.0843	14.1711	0.0053	0.1754	33.0595	0.00294	0.155	52.6521	0.03303	0.224	6.7825
LM_HOMCHL002836	0.00482	0.1076	22.329	0.09171	0.1369	1.4932	0.00623	0.1583	25.4032	0.0053	0.23	43.3553	0.0047	0.1827	38.8455
LM_HOMCHL002838	0.09921	0.0873	0.8805	0.10638	0.1197	1.1247	0.09673	0.1221	1.2622	0.07219	0.1315	1.8218	0.00217	0.1125	51.8394
LM_HOMCHL002840	0.00871	0.1437	16.4993	0.21858	0.1273	0.5823	0.1372	0.2688	1.9594	0.16014	0.3241	2.0244	0.16009	0.3241	2.0244
LM_HOMCHL002848	0.05213	0.1234	2.367	0.04297	0.1444	3.361	0.06435	0.1148	1.7829	0.00519	0.196	37.7614	0.00305	0.1986	65.1102
LM_HOMCHL002849	0.01615	0.037	2.288	0.00446	0.0517	11.5999	0.00408	0.0192	4.702	0.00131	0.0275	21.0269	0.01481	0.0232	1.5699
LM_HOMCHL002861	0.10417	0.1649	1.5824	0.12569	0.2899	2.3061	0.12071	0.2162	1.791	0.14938	0.5533	3.7035	0.00556	0.3285	59.1079
LM_HOMCHL002870	0.01051	0.129	12.2789	0.00675	0.2262	33.5302	0.00677	0.2262	33.5302	0.00569	0.1957	34.4206	0.00178	0.0951	53.4448
LM_HOMCHL002873	0.0071	0.141	19.8568	0.10511	0.1523	1.4489	0.00416	0.1829	43.995	0.00608	0.238	39.1379	0.00549	0.3208	58.4289
LM_HOMCHL002876	0.03461	0.1193	3.4484	0.0049	0.1596	32.5969	0.08512	0.2098	2.4653	0.00572	0.2692	47.0608	0.19111	0.3228	1.6891
LM_HOMCHL002877	0.13857	0.1138	0.8213	0.04316	0.1287	2.9826	0.06169	0.1458	2.3639	0.00625	0.2752	44.0067	0.14104	0.5897	4.181
LM_HOMCHL002878	0.12286	0.0626	0.5098	0.02084	0.0707	3.3896	0.07246	0.0988	1.3639	0.00239	0.108	45.2308	0.0579	0.1219	2.105
LM_HOMCHL002883	0.09899	0.1227	1.24	0.06085	0.1064	1.749	0.08842	0.166	1.8776	0.07116	0.1617	2.2723	0.22546	0.417	1.8495
LM_HOMCHL002886	0.00892	0.1619	18.1555	0.0954	0.1388	1.4553	0.00655	0.1885	28.77	0.00451	0.2251	49.9412	0.01537	0.099	6.4429
LM_HOMCHL002890	0.22556	0.1123	0.4978	0.0369	0.1243	3.3697	0.11929	0.192	1.6099	0.00397	0.1842	46.3523
LM_HOMCHL002892	0.0062	0.1141	18.3872	0.00268	0.104	38.8715	0.00539	0.1554	28.832	0.00422	0.192	45.4416	0.00222	0.1464	65.8521
LM_HOMCHL002894	0.00724	0.1338	18.4751	0.00842	0.1314	15.6175	0.00688	0.2208	32.0901	0.00353	0.2288	64.8248	0.00259	0.1542	59.5804
LM_HOMCHL002895	0.02432	0.0991	4.0737	0.05663	0.1102	1.9457	0.05461	0.1905	3.4892	0.00421	0.1909	45.3671	0.00813	0.5169	63.5532
LM_HOMCHL002897	0.00979	0.1332	13.6027	0.06446	0.1817	2.8192	0.01427	0.231	16.1875	0.02765	0.5216	18.8616	0.01004	0.3637	36.2269
LM_HOMCHL002910	0.00596	0.1323	22.1852	0.01819	0.1426	7.841	0.00461	0.1953	42.3201	0.00607	0.1323	22.1852	0.00285	0.1618	56.7187
LM_HOMCHL002919	0.01755	0.1034	5.8913	0.00246	0.0865	35.2223	0.05205	0.132	2.5348	0.00299	0.1367	45.7836	0.00368	0.2152	58.4975
LM_HOMCHL002926	0.05312	0.0888	1.6725	0.06604	0.1396	2.1148	0.08389	0.1394	1.6611	0.20457	0.4138	2.0229
LM_HOMCHL002936	0.0256	0.1278	4.9905	0.07824	0.1371	1.7526	0.06429	0.196	3.0479	0.0052	0.2493	47.9863	0.01256	0.1356	10.792
LM_HOMCHL002942	0.00472	0.0997	21.1307	0.00337	0.1524	45.1911	0.00947	0.2483	26.2343	0.01255	0.1507	12.0065	0.02768	0.1601	5.7832
LM_HOMCHL002950	0.1005	0.1319	1.312	0.08593	0.1677	1.9521	0.07853	0.378	4.8133	0.0109	0.3682	33.7798
LM_HOMCHL002955	0.00647	0.1222	18.8964	0.15492	0.2218	1.4317	0.00483	0.1993	41.247	0.00575	0.2798	48.661
LM_HOMCHL002959	0.12007	0.1308	1.089	0.08398	0.111	1.321	0.10171	0.1809	1.7791	0.02418	0.1616	6.6846	0.01244	0.195	15.6722
LM_HOMCHL002961	0.02113	0.0621	2.9387	0.0637	0.0863	1.3545	0.03554	0.0693	1.9507	0.00215	0.1301	60.4893	0.00137	0.0748	54.4865
LM_HOMCHL002962	0.00567	0.1373	24.2155	0.01652	0.2776	16.8015	0.006	0.241	40.1885	0.00879	0.5116	58.1991	0.00372	0.2479	66.5763
LM_HOMCHL002964	0.02064	0.0885	4.2904	0.03955	0.0785	1.9855	0.06067	0.1061	1.749	0.00468	0.15	32.0627	0.00177	0.1041	58.7077
LM_HOMCHL002969	0.12382	0.1126	0.9097	0.09975	0.13	1.3027	0.09964	0.177	1.7767	0.00468	0.1898	40.5224	0.00426	0.2427	56.9874
LM_HOMCHL002996	0.05406	0.0972	1.7975	0.04666	0.1381	2.9599	0.03656	0.1636	4.474	0.00905	0.1683	18.5915	0.00306	0.1738	56.7973
LM_HOMCHL003003	0.00393	0.107	27.3513	0.00382	0.1413	36.9535	0.00386	0.1413	36.9535	0.00328	0.163	49.4057	0.00335	0.163	49.4057
LM_HOMCHL003026	0.00498	0.1171	23.486	0.05528	0.1592	2.8793	0.00674	0.203	30.134	0.02748	0.1744	6.3467	0.00941	0.6566	69.7951
LM_HOMCHL003039	0.17651	0.137	0.7765	0.01036	0.3081	29.7308	0.21147	0.2089	0.9881	0.00432	0.188	43.4793	0.01287	0.3105	24.1148
LM_HOMCHL003040	0.00703	0.1206	17.1415	0.0139	0.1479	10.6452	0.00492	0.1711	34.7917	0.00304	0.1366	44.9358	0.00321	0.1679	52.3826
LM_HOMCHL003041	0.02607	0.1368	5.248	0.03425	0.1341	3.9152	0.05647	0.1535	2.7194	0.03947	0.1447	3.6674	0.00315	0.1697	53.8146
LM_HOMCHL003044	0.07373	0.1385	1.8781	0.12138	0.1885	1.5529	0.08759	0.1912	2.1833	0.0339	0.4346	12.8213
LM_HOMCHL003053	0.10901	0.0767	0.7036	0.01058	0.0935	8.8329	0.06193	0.1096	1.7697	0.00961	0.1169	12.168	0.0188	0.1426	7.5883
LM_HOMCHL003060	0.00527	0.1448	27.4514	0.06123	0.2228	3.6393	0.04071	0.2262	5.5554	0.00787	0.5066	64.3799	0.00275	0.181	65.9158
LM_HOMCHL003064	0.0797	0.0686	0.8613	0.00403	0.1021	25.3315	0.03765	0.0747	1.9852	0.17662	0.1797	1.0173	0.00093	0.0562	60.5103
LM_HOMCHL003067	0.22488	0.1305	0.5803	0.11291	0.2286	2.0252	0.03159	0.2237	7.0818	0.00755	0.2634	34.8884
LM_HOMCHL003068	0.03849	0.0842	2.1874	0.00302	0.1234	40.8303	0.05361	0.1442	2.6902	0.00363	0.1611	44.3444	0.00223	0.1098	49.2653
LM_HOMCHL003070	0.08421	0.1513	1.7966	0.17828	0.2396	1.3441	0.16495	0.2743	1.6627	0.01043	0.6074	58.2434	0.00445	0.2618	58.8642
LM_HOMCHL003082	0.0077	0.1718	22.3098	0.00685	0.2119	30.9175	0.00529	0.2688	50.8203	0.00512	0.2158	42.1967	0.01021	0.6536	64.0389
LM_HOMCHL003088	0.06463	0.1257	1.9456	0.0048	0.161	33.5438	0.05472	0.147	2.686	0.02447	0.2554	10.4369	0.0021	0.1396	66.4776
LM_HOMCHL003090	0.12763	0.0949	0.7438	0.02989	0.1249	4.1783	0.03248	0.1439	4.4322	0.01925	0.1552	8.0586	0.00412	0.193	46.8032
LM_HOMCHL003094	0.00419	0.2277	55.8779	0.06453	0.1139	1.7658	0.00457	0.1976	43.2058	0.00407	0.2277	55.8779	0.00435	0.2457	56.5163
LM_HOMCHL003105	0.11956	0.1163	0.9725	0.18104	0.2011	1.1106	0.14805	0.2364	1.597	0.05674	0.1977	3.484	0.01681	0.2147	12.7664
LM_HOMCHL003109	0.00938	0.1529	16.3125	0.05915	0.1546	2.6141	0.01415	0.169	11.9413	0.01495	0.2891	19.3353	0.00406	0.1769	43.5521
LM_HOMCHL003114	0.02824	0.1376	4.8717	0.15062	0.1285	0.8533	0.05486	0.2494	4.5461	0.01617	0.2415	14.9356	0.00598	0.2843	47.5156
LM_HOMCHL003116	0.01226	0.146	11.9041	0.1006	0.2716	2.6994	0.01317	0.3729	28.3082	0.01432	0.2505	17.4952
LM_HOMCHL003119	0.07577	0.0954	1.2589	0.03045	0.0795	2.6119	0.03747	0.1268	3.3844	0.01888	0.2329	12.3348	0.01772	0.1066	6.0184
LM_HOMCHL003135	0.04731	0.1153	2.437	0.02368	0.1407	5.9417	0.04686	0.1666	3.5538	0.19392	0.2561	1.3205	0.00651	0.336	51.638
LM_HOMCHL003144	0.12235	0.1372	1.1212	0.04801	0.137	2.8533	0.1144	0.1948	1.7032	0.0497	0.2255	4.538	0.05924	0.3863	6.5211
LM_HOMCHL003147	0.11285	0.1275	1.13	0.05569	0.1793	3.219	0.10532	0.1786	1.6962	0.01218	0.3287	26.9867	0.03696	0.2739	7.4106
LM_HOMCHL003148	0.00529	0.1065	20.1337	0.05546	0.121	2.1818	0.00608	0.2187	35.9431	0.03598	0.1479	4.1105	0.00366	0.1931	52.7014
LM_HOMCHL003167	0.00268	0.0784	29.2141	0.0051	0.1311	25.6899	0.00318	0.1345	42.3369	0.00359	0.1294	36.0293	0.00644	0.4077	63.3072
LM_HOMCHL003173	0.00551	0.1382	25.1033	0.00375	0.1311	34.9368	0.00818	0.2207	26.9784	0.0033	0.1985	60.1249
LM_HOMCHL003175	0.0337	0.1092	3.2396	0.05248	0.1021	1.9462	0.0555	0.119	2.1439	0.00376	0.1951	51.9006	0.00157	0.0902	57.6403
LM_HOMCHL003177	0.00737	0.1219	16.5391	0.00715	0.2575	35.9886	0.03853	0.1805	4.6829	0.54255	0.3518	0.6485	0.00402	0.2373	58.9591
LM_HOMCHL003180	0.00951	0.1423	14.9639	0.04049	0.1441	3.5591	0.00988	0.2923	29.5907	0.0067	0.2037	30.4162	0.00344	0.2313	67.3375
LM_HOMCHL003191	0.00822	0.1673	20.3424	0.10164	0.1625	1.5984	0.00562	0.2363	42.0243	0.19417	0.2783	1.4335	0.00489	0.2814	57.5837
LM_HOMCHL003204	0.005	0.1135	22.6827	0.09815	0.1667	1.6979	0.00901	0.2207	24.4909	0.03935	0.2107	5.3554	0.02222	0.3276	14.7447
LM_HOMCHL003207	0.01181	0.1275	10.7916	0.05565	0.1167	2.097	0.04728	0.131	2.7712	0.09095	0.4792	5.2687	0.00265	0.1768	66.7914
LM_HOMCHL003211	0.02857	0.1416	4.9577	0.12231	0.1608	1.3143	0.08735	0.1331	1.5236	0.00684	0.3183	46.5256	0.00947	0.5429	57.3463
LM_HOMCHL003218	0.04448	0.1192	2.6789	0.06276	0.1297	2.0669	0.06804	0.1676	2.4641	0.00527	0.2706	51.3096	0.00788	0.4755	60.3157
LM_HOMCHL003219	0.08634	0.1717	1.9886	0.00676	0.2532	37.3787	0.11959	0.2275	1.9023	0.00679	0.2532	37.3787
LM_HOMCHL003224	0.02902	0.18	6.2001	0.00298	0.2112	70.896	0.04853	0.2053	4.2312
LM_HOMCHL003247	0.02538	0.0989	3.8976	0.00257	0.1072	41.7683	0.02942	0.1924	6.5387	0.01427	0.1081	7.575	0.06899	0.1041	1.5091
LM_HOMCHL003252	0.13315	0.1226	0.9209	0.15086	0.189	1.2527	0.09717	0.2078	2.138	0.00482	0.1956	40.5414	0.00388	0.2351	60.6335
LM_HOMCHL003258	0.00467	0.0703	15.0648	0.00345	0.0731	21.171	0.00565	0.079	13.9687	0.00377	0.1171	31.0886	0.00131	0.0517	39.4021
LM_HOMCHL003269	0.07562	0.0998	1.3193	0.04544	0.0966	2.1267	0.09623	0.166	1.7252	0.00781	0.2588	33.1327
LM_HOMCHL003270	0.00408	0.1066	26.091	0.06244	0.1501	2.4035	0.03732	0.1683	4.5108	0.0042	0.1936	46.104	0.01625	0.1497	9.2089
LM_HOMCHL003271	0.05582	0.106	1.8999	0.0226	0.1003	4.4404	0.01396	0.0203	1.4556	0.01091	0.1749	16.0256	0.00062	0.0439	70.8485
LM_HOMCHL003272	0.00794	0.1553	19.5566	0.06873	0.1883	2.7394	0.00631	0.2741	43.4702	0.00551	0.2479	44.9673
LM_HOMCHL003276	0.00754	0.1165	15.4501	0.01416	0.1296	9.1526	0.00634	0.2052	32.3717	0.00553	0.2742	49.5508	0.0037	0.2483	67.1535
LM_HOMCHL003277	0.00852	0.1434	16.8447	0.07399	0.1512	2.0439	0.00653	0.2441	37.3967	0.01427	0.5438	38.1049	0.18838	0.2291	1.2165
LM_HOMCHL003306	0.00603	0.1434	23.7873	0.1258	0.1768	1.4054	0.00637	0.3037	47.677	0.00638	0.3037	47.677
LM_HOMCHL003307	0.00706	0.1737	24.6217	0.19592	0.3337	1.7033	0.01097	0.3568	32.5099	0.07206	0.5061	7.0241
LM_HOMCHL003327	0.00704	0.1133	16.0938	0.13526	0.2556	1.8893	0.05468	0.2153	3.9362	0.02061	0.2036	9.881	0.00294	0.1772	60.2067
LM_HOMCHL003329	0.02391	0.1244	5.2016	0.07827	0.1547	1.9759	0.06089	0.2375	3.9014	0.00461	0.2955	64.0642	0.00624	0.3982	63.7669
LM_HOMCHL003344	0.00545	0.1165	21.3582	0.00367	0.2542	69.2564	0.00298	0.1648	55.3081	0.00387	0.1857	47.9993	0.00464	0.3207	69.0434
LM_HOMCHL003351	0.01026	0.1252	12.1979	0.00539	0.171	31.7234	0.00664	0.2087	31.4181	0.00343	0.1922	56.0657	0.00843	0.5337	63.291
LM_HOMCHL003352	0.13825	0.1093	0.7904	0.04315	0.1117	2.5881	0.08057	0.1713	2.1261	0.00949	0.1741	18.351	0.00323	0.1491	46.1628
LM_HOMCHL003364	0.08603	0.1089	1.2662	0.09547	0.1318	1.3805	0.11914	0.1758	1.4754	0.00395	0.2249	57.0165	0.00449	0.257	57.2262
LM_HOMCHL003368	0.00713	0.165	23.1282	0.11091	0.1597	1.4399	0.00473	0.1681	35.5469	0.00732	0.2461	33.6183	0.09398	0.5304	5.6433
LM_HOMCHL003388	0.0339	0.1281	3.7775	0.06506	0.2438	3.7469	0.20564	0.2101	1.0215	0.09309	0.2904	3.1192	0.00855	0.5032	58.8625
LM_HOMCHL003391	0.03292	0.1171	3.5571	0.00842	0.1515	18.0075	0.04775	0.1656	3.4671	0.00256	0.1481	57.86
LM_HOMCHL003395	0.0093	0.177	19.0224	0.06838	0.204	2.9839	0.00736	0.3265	44.3519	0.00453	0.2513	55.5152	0.008	0.4695	58.6742
LM_HOMCHL003428	0.00539	0.0957	17.7685	0.10616	0.1226	1.1546	0.08139	0.1559	1.9158	0.00476	0.2118	44.5031	0.09208	0.2581	2.8032
LM_HOMCHL003435	0.00707	0.1537	21.7458	0.00778	0.2555	32.8462	0.00756	0.249	32.937	0.01131	0.3533	31.2324
LM_HOMCHL003440	0.00549	0.1102	20.055	0.00299	0.1082	36.1579	0.02348	0.1901	8.0975	0.00358	0.1579	44.0902	0.00434	0.2236	51.5249
LM_HOMCHL003445	0.00595	0.1266	21.2691	0.00473	0.1275	26.9451	0.00487	0.1993	40.9438	0.05141	0.2005	3.8992
LM_HOMCHL003470	0.01076	0.1747	16.2297	0.08504	0.3233	3.802	0.00697	0.1962	28.1409	0.00639	0.3972	62.1323
LM_HOMCHL003480	0.00922	0.1902	20.6347	0.01113	0.3498	31.4139	0.0928	0.3722	4.0106	0.01075	0.7327	68.151
LM_HOMCHL003481	0.00758	0.1779	23.4536	0.06113	0.251	4.1061	0.00624	0.2488	39.8405	0.12377	0.5833	4.7125	0.00774	0.4786	61.8327
LM_HOMCHL003482	0.00619	0.1353	21.8683	0.00436	0.1417	32.4641	0.00464	0.1822	39.2182	0.00377	0.261	69.2654
LM_HOMCHL003494	0.00495	0.1044	21.0712	0.03682	0.1087	2.9518	0.16834	0.2047	1.2162	0.0024	0.1645	68.474	0.00408	0.2338	57.3455
LM_HOMCHL003501	0.0067	0.1623	24.2446	0.00577	0.3005	52.0835	0.00712	0.3042	42.7173	0.11058	0.4428	4.0041	0.00619	0.4601	74.3377
LM_HOMCHL003503	0.00792	0.1257	15.8859	0.00372	0.1313	35.3135	0.00686	0.1852	26.9948	0.00767	0.2211	28.8294	0.00853	0.4107	48.1459
LM_HOMCHL003509	0.08544	0.0888	1.0395	0.04215	0.0778	1.8461	0.05027	0.1336	2.6583	0.02878	0.1072	3.7249
LM_HOMCHL003540	0.00602	0.122	20.2634	0.00466	0.2048	43.9056	0.03184	0.2863	8.9926	0.00497	0.3069	61.8103	0.00744	0.4569	61.3963
LM_HOMCHL003549	0.007	0.1351	19.3007	0.00522	0.1769	33.9002	0.00545	0.2596	47.6052	0.0266	0.2423	9.108
LM_HOMCHL003559	0.00629	0.1279	20.3351	0.00552	0.1424	25.7754	0.00675	0.2152	31.9029	0.01015	0.2123	20.9197	0.00315	0.1906	60.5931
LM_HOMCHL003561	0.14317	0.1163	0.8126	0.00788	0.2205	28.0039	0.21079	0.2706	1.2836	0.00743	0.2364	31.7981	0.08538	0.3982	4.6643
LM_HOMCHL003570	0.00643	0.1367	21.2664	0.01011	0.2513	24.8556	0.00681	0.2104	30.9089	0.19639	0.2664	1.3564	0.22952	0.5804	2.5286
LM_HOMCHL003579	0.00879	0.1735	19.7499	0.21266	0.3338	1.5696	0.00688	0.2252	32.7201	0.00481	0.2334	48.5783	0.07882	0.2328	2.9531
LM_HOMCHL003585	0.06886	0.1159	1.6827	0.04915	0.1026	2.0866	0.03426	0.1867	5.4483	0.03988	0.1468	3.6802
LM_HOMCHL003602	0.00679	0.1097	16.1596	0.01693	0.0913	5.3946	0.00587	0.1893	32.2328	0.00306	0.1315	42.9471	0.00877	0.5751	65.536
LM_HOMCHL003613	0.00687	0.1066	15.5226	0.0314	0.1326	4.2245	0.00595	0.206	34.62	0.00644	0.2416	37.5018	0.01816	0.1884	10.375
LM_HOMCHL003631	0.00874	0.1702	19.4849	0.0265	0.1886	7.1155	0.0057	0.1959	34.3891	0.10544	0.2087	1.9798
LM_HOMCHL003633	0.00865	0.2089	24.1476	0.08965	0.1485	1.6565	0.00542	0.2282	42.1016	0.00594	0.3053	51.3761
LM_HOMCHL003634	0.00471	0.1034	21.9563	0.06221	0.1502	2.4149	0.00622	0.2057	33.0601	0.02166	0.2202	10.1643
LM_HOMCHL003647	0.0451	0.115	2.5497	0.01331	0.1167	8.766	0.03006	0.1499	4.9881	0.0021	0.0866	41.2778	0.0035	0.2139	61.0753
LM_HOMCHL003651	0.33919	0.1519	0.448	0.02944	0.2561	8.6981	0.1793	0.1632	0.9104	0.03829	0.9235	24.1151	0.34158	0.2605	0.7626
LM_HOMCHL003655	0.05033	0.0681	1.3531	0.01417	0.0725	5.1202	0.02929	0.0983	3.3549	0.00917	0.3969	43.2731	0.00436	0.2771	63.4996
LM_HOMCHL003658	0.12831	0.1213	0.9455	0.00744	0.2591	34.8182	0.05334	0.1908	3.5776	0.00732	0.2377	32.4883	0.03722	0.1049	2.8185
LM_HOMCHL003669	0.00555	0.1557	28.0429	0.1826	0.215	1.1771	0.11109	0.2341	2.1076	0.00608	0.3152	51.871	0.00269	0.1579	58.7931
LM_HOMCHL003691	0.00733	0.136	18.554	0.08501	0.1704	2.0041	0.03579	0.2825	7.8935	0.00686	0.4225	61.5887	0.33236	0.4285	1.2894
LM_HOMCHL003711	0.17913	0.117	0.6529	0.10801	0.1801	1.6677	0.01514	0.1493	9.8585	0.17405	0.2849	1.6372	0.00417	0.2031	48.7051
LM_HOMCHL003715	0.00672	0.1642	24.4293	0.07367	0.2195	2.9798	0.01127	0.3534	31.3466	0.00688	0.3279	47.6899	0.00615	0.4083	66.3402
LM_HOMCHL003749	0.00602	0.1381	22.9453	0.11904	0.2999	2.5193	0.00927	0.2594	27.9724	0.00699	0.4008	57.3527	0.18599	0.4407	2.3693
LM_HOMCHL003760	0.04166	0.1499	3.598	0.03873	0.1924	4.967	0.04458	0.1374	3.0825	0.00741	0.2135	28.8182	0.04922	0.0698	1.4195
LM_HOMCHL003764	0.08027	0.117	1.4576	0.29198	0.1754	0.6008	0.16807	0.1728	1.0281	0.04337	0.1329	3.0638
LM_HOMCHL003794	0.00556	0.1444	25.9549	0.00959	0.263	27.4297	0.00862	0.313	36.3003	0.02494	0.2271	9.1078	0.00639	0.4015	62.8515
LM_HOMCHL003832	0.08719	0.1683	1.93	0.09686	0.2837	2.9288	0.12639	0.2885	2.2825	0.00708	0.4388	61.9785
LM_HOMCHL003842	0.00882	0.1596	18.0995	0.04336	0.1614	3.7225	0.00537	0.214	39.8854	0.00737	0.3138	42.5962	0.04777	0.2658	5.5639
LM_HOMCHL003855	0.00547	0.1336	24.4308	0.05251	0.1325	2.5234	0.11855	0.2289	1.9311	0.0045	0.2352	52.2806	0.00319	0.2286	71.5524
LM_HOMCHL003857	0.00819	0.1607	19.6099	0.05073	0.1185	2.3356	0.00792	0.1586	20.0173	0.00381	0.251	65.9235	0.00413	0.2076	50.2545
LM_HOMCHL003865	0.12317	0.1315	1.0673	0.11555	0.183	1.5841	0.1199	0.314	2.6189	0.00549	0.2369	43.1402	0.00603	0.2545	42.242
LM_HOMCHL003866	0.00636	0.1465	23.0374	0.05154	0.1704	3.3072	0.16117	0.2771	1.7192	0.0048	0.2047	42.645	0.00801	0.4547	56.7762
LM_HOMCHL003875	0.05827	0.1391	2.3878	0.03497	0.2735	7.8211	0.04153	0.2061	4.9619	0.20633	0.6793	3.2924	0.01088	0.3441	31.6387
LM_HOMCHL003886	0.05049	0.1932	3.8267	0.00852	0.3596	42.2244	0.00757	0.4121	54.3233	0.00765	0.4121	54.3233
LM_HOMCHL003915	0.00791	0.167	21.1103	0.03798	0.2389	6.2894	0.0056	0.2357	42.055	0.00746	0.4022	53.9497
LM_HOMCHL003922	0.08768	0.1697	1.9355	0.01952	0.1755	8.9886	0.08466	0.2449	2.8922	0.00821	0.5431	66.1359
LM_HOMCHL003936	0.00933	0.1433	15.3544	0.0061	0.2169	35.5386	0.00953	0.3305	34.6917	0.03383	0.2548	7.5309
LM_HOMCHL003954	0.00561	0.1868	33.3248	0.00342	0.2865	83.6536	0.0031	0.164	52.819	0.00638	0.5275	82.6678
LM_HOMCHL003990	0.00642	0.1535	23.9003	0.02498	0.1953	7.8182	0.00937	0.3075	32.8075	0.84746			0.01188	0.8283	69.6975
LM_HOMCHL004059	0.07546	0.1699	2.251	0.00497	0.2251	45.2896	0.05896	0.2162	3.6664	0.01411	0.238	16.8668	0.01095	0.8046	73.4999
LM_HOMCHL004087	0.00621	0.1519	24.4639	0.00431	0.1624	37.7216	0.00889	0.2565	28.8568	0.02843	0.3233	11.3693	0.03106	0.183	5.8909
LM_HOMCHL004099	0.0077	0.1333	17.3176	0.03049	0.1511	4.9574	0.00798	0.255	31.9651	0.00477	0.3181	66.7541	0.00519	0.346	66.6685
LM_HOMCHL004106	0.00925	0.1631	17.6299	0.0076	0.4742	62.3593	0.01277	0.3293	25.7947	0.00555	0.2472	44.5677	0.01649	0.5358	32.4863
LM_HOMCHL004117	0.00597	0.1232	20.6335	0.00497	0.2419	48.6598	0.00776	0.2486	32.045	0.00566	0.4317	76.3031	0.00452	0.3466	76.6159
LM_HOMCHL004162	0.00877	0.1642	18.7341	0.15566	0.2798	1.7972	0.0069	0.2757	39.9355	1.16914			0.00355	0.1809	50.9224
LM_HOMCHL004179	0.00526	0.14	26.6145	0.00579	0.1535	26.5088	0.00337	0.1623	48.2001	0.0064	0.3497	54.6189
LM_HOMCHL004204	0.00594	0.142	23.9178	0.00309	0.1208	39.076	0.05787	0.191	3.3007	0.0394	0.5424	13.7659
LM_HOMCHL004213	0.06591	0.1277	1.9375	0.30135	0.2329	0.773	0.05562	0.3914	7.0367	0.08006	0.2256	2.8183	0.00706	0.4737	67.0675
LM_HOMCHL004221	0.03947	0.083	2.1038	0.01138	0.1075	9.4417	0.01406	0.1009	7.1813
LM_HOMCHL004259	0.00423	0.1337	31.613	0.26619	0.6805	2.5563	0.00965	0.2648	27.4351	0.91658			0.00362	0.2905	80.2955
LM_HOMCHL004261	0.00623	0.1463	23.4734	0.13402	0.1561	1.1647	0.00708	0.361	50.9669	0.00567	0.2902	51.2034
LM_HOMCHL004329	0.00988	0.1833	18.5619	0.014	0.161	11.4946	0.00436	0.2377	54.524	0.12985	0.3491	2.689	0.27344	0.6067	2.2189
LM_HOMCHL004386	0.00782	0.1261	16.1291	0.0974	0.1795	1.8434	0.11581	0.226	1.9513	0.00634	0.3594	56.6646	0.12065	0.3371	2.7944
LM_HOMCHL004495	0.00489	0.1424	29.1213	0.00624	0.2353	37.7339	0.0451	0.1612	3.5747	0.02199	0.4635	21.0762	0.005	0.3799	76.0354
LM_HOMCHL004497	0.00856	0.178	20.7879	0.00841	0.307	36.5399	0.00625	0.2439	39.0192	0.00836	0.307	36.5399
LM_HOMCHL004567	0.01149	0.1928	16.7788	0.1041	0.2657	2.5522	0.00572	0.2349	41.0868	0.0097	0.5871	60.5327
LM_HOMCHL004569	0.00978	0.1846	18.8696	0.16182	0.15	0.9267	0.28127	0.3166	1.1257	0.01441	0.2561	17.7632	0.00658	0.3893	59.199
LM_HOMCHL004597	0.00671	0.1784	26.5677	0.10462	0.1471	1.4058	0.07038	0.2046	2.9065	0.00828	0.4275	51.6304
LM_HOMCHL004687	0.00743	0.1645	22.1745	0.00738	0.3874	52.9021	0.00394	0.1473	37.4052	0.00732	0.3874	52.9021
LM_HOMCHL004722	0.00724	0.1429	19.7346	0.00416	0.1114	26.7981	0.02319	0.1382	5.9593	0.00668	0.2874	43.0121
LM_HOMCHL004775	0.06486	0.1707	2.6321	0.00406	0.1859	45.7336	0.00475	0.2564	54.0011
LM_HOMCHL004912	0.05541	0.1349	2.4351	0.01966	0.1426	7.2536	0.05556	0.1842	3.3151
LM_HOMCHL004928	0.01379	0.1593	11.5483	0.06065	0.1244	2.0516	0.01219	0.1658	13.5963	0.00437	0.1977	45.1949
LM_HOMCHL004963	0.19147	0.117	0.611	0.01448	0.2082	14.3781	0.12657	0.1015	0.8022	0.0062	0.1883	30.3527	0.09096	0.1825	2.0062
LM_HOMCHL005051	0.00485	0.1418	29.206	0.00295	0.1128	38.2817	0.00251	0.1189	47.4719	0.01806	0.2942	16.2937
LM_HOMCHL005087	0.0069	0.1447	20.9689	0.00445	0.3135	70.4279	0.00715	0.2635	36.8663	0.0083	0.5021	60.5036	0.0075	0.523	69.7393
LM_HOMCHL005095	0.0472	0.1338	2.8345	0.09118	0.0906	0.9934	0.05036	0.1316	2.6139	0.00323	0.2375	73.4424
LM_HOMCHL005226	0.01925	0.1367	7.1008	0.03021	0.0548	1.815	0.04356	0.1422	3.2644	999	0.1641	0.0002
Average	0.0486401	0.110255	9.60277	0.0509833	0.136937	9.68062	0.0486601	0.171673	11.9898	1.89889	0.212525	31.2423	0.0235004	0.203588	38.9768
Median	0.03136	0.1089	3.4484	0.04388	0.1268	2.4558	0.04354	0.166	3.1666	0.006235	0.1898	34.7676	0.0046	0.1677	49.7143
