# Supplementary material for: Genome-wide patterns of selection–drift variation strongly associate with organismal traits across the green plant lineage
Source: PubMed Central journal article supplement (PMC11444171; doi:10.1101/gr.279002.124), 2024-08
Supplement: Supplemental_figure_S3.pdf [file Supplemental_figure_S3.pdf]

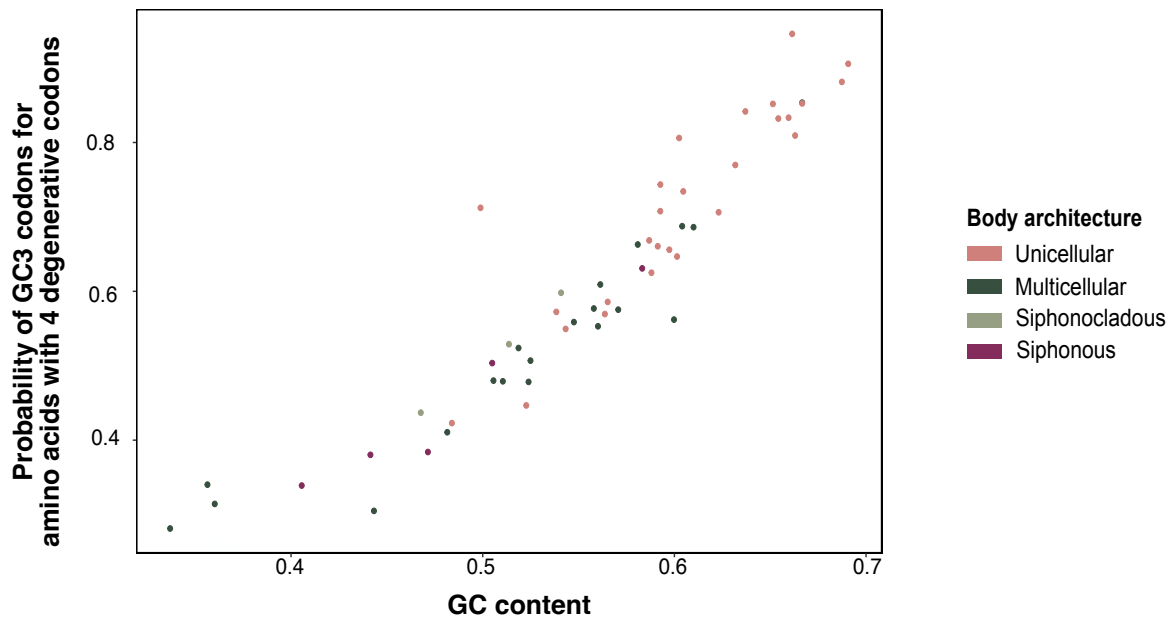

**Supplemental Figure S3:** Plot showing the correlation between the probability of GC3 codons for amino acids with 4 degenerative codons and GC content. The linear correlation between the probability of GC3 codons for amino acids with 4 degenerative codons and GC content suggests that GC composition is major factor driving usage of these codons.
