# Supplementary material for: Genome-wide patterns of selection–drift variation strongly associate with organismal traits across the green plant lineage
Source: PubMed Central journal article supplement (PMC11444171; doi:10.1101/gr.279002.124), 2024-08
Supplement: Supplemental_figure_S7.pdf [file Supplemental_figure_S7.pdf]

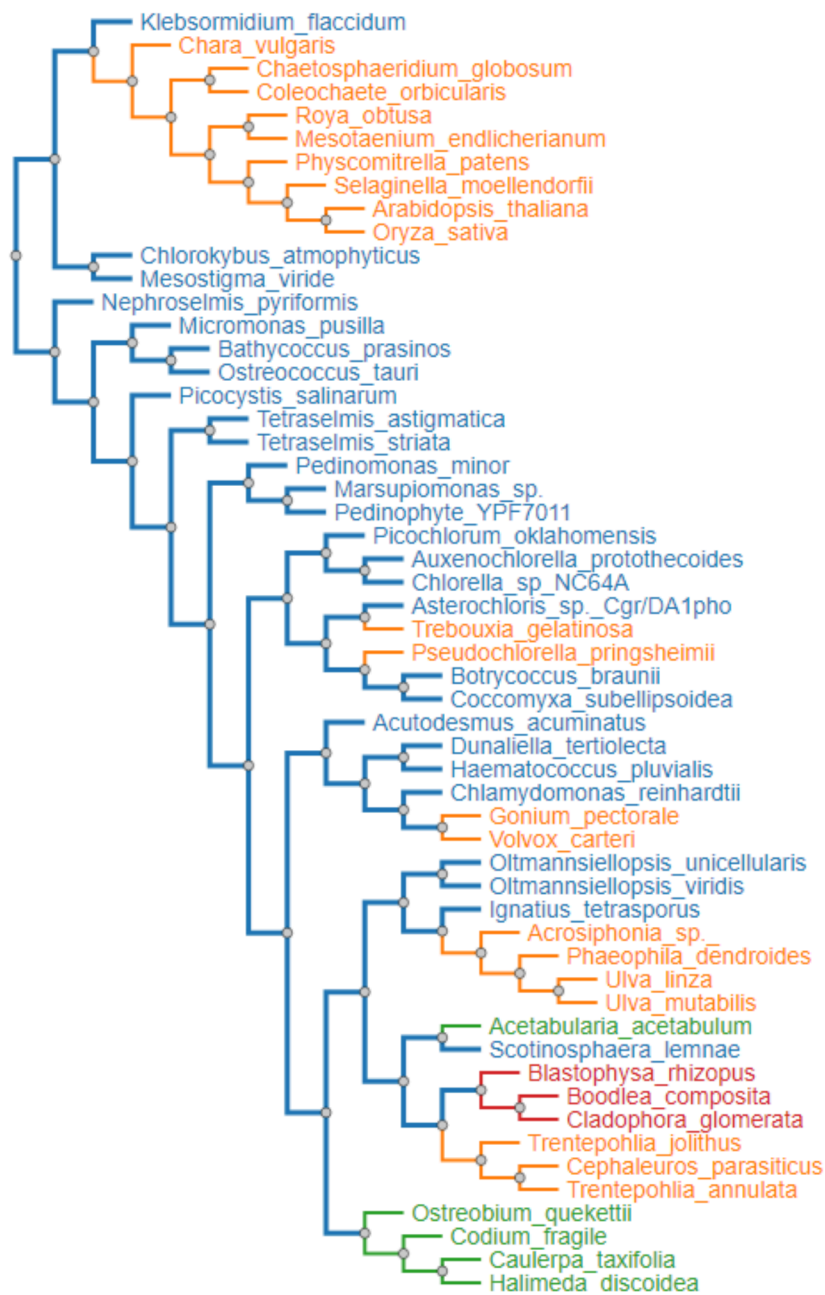

- Unicellular
- Multicellular AI
- Siphonous
- Siphonocladous

**Supplemental Figure S7:** Green Algal Phylogeny showing the trait categories (Unicellular, Multicellular, Siphonous and Siphonocladous) for body architecture based model [M1]. The molecular evolutionary traits: omega(dN/dS), non-synonymous(dN) and synonymous(dS) were obtained for each of the four categories by allowing four different selection pattern corresponding to the trait categories.
