# Supplementary material for: Genome-wide patterns of selection–drift variation strongly associate with organismal traits across the green plant lineage
Source: PubMed Central journal article supplement (PMC11444171; doi:10.1101/gr.279002.124), 2024-08
Supplement: Supplemental_figure_S10.pdf [file Supplemental_figure_S10.pdf]

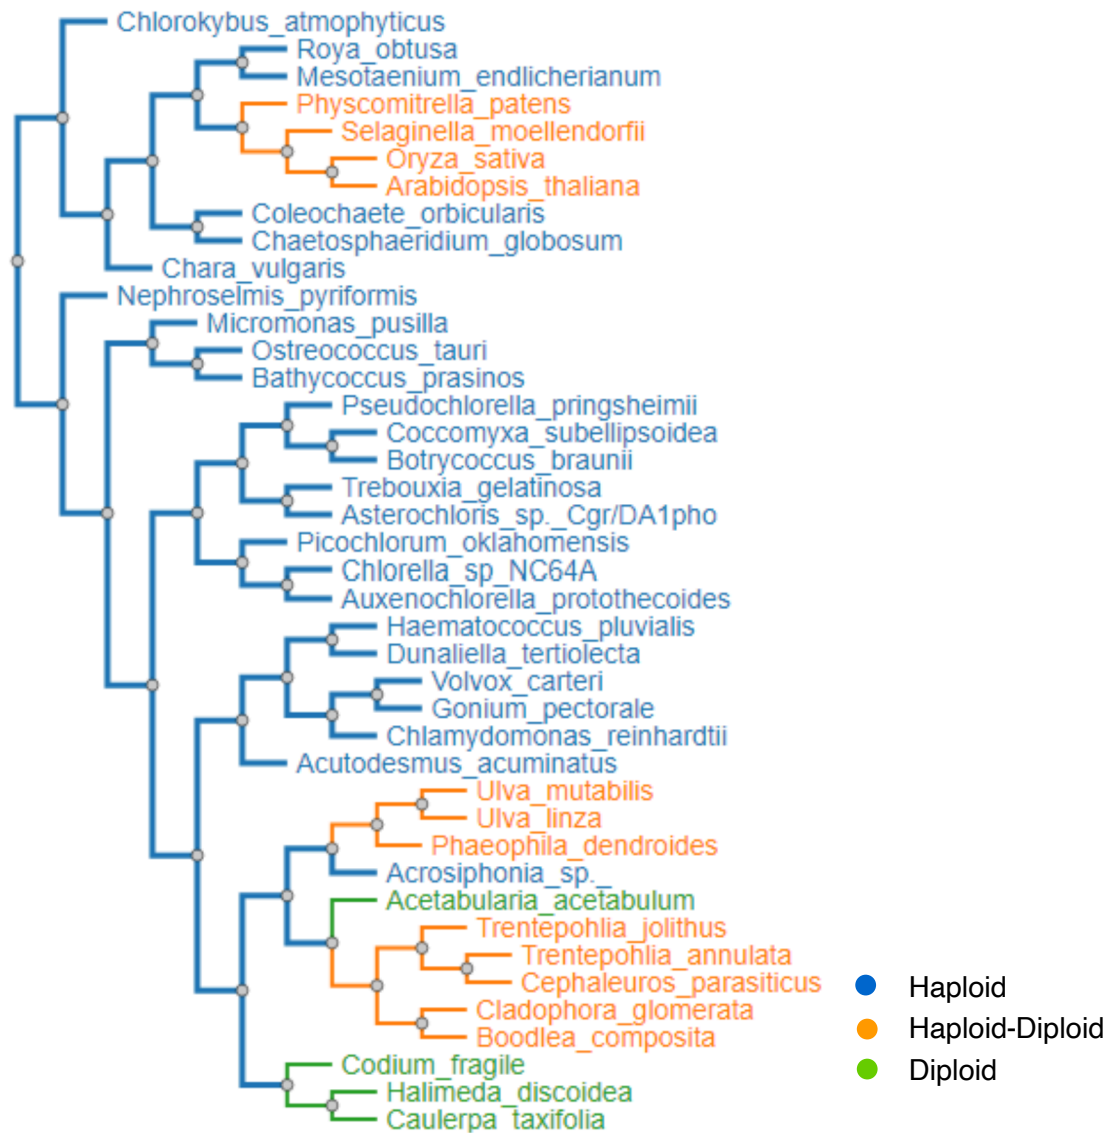

**Supplemental Figure S10:** Green Algal Phylogeny of liberal dataset showing the trait categories (haploid, haploid-diploid and diploid) for Life cycle based model [M2]. The molecular evolutionary traits: omega ( $dN/dS$ ), non-synonymous ( $dN$ ) and synonymous ( $dS$ ) were obtained for each of the three categories by allowing three different selection pattern corresponding to the trait categories.
