# Supplementary material for: Genome-wide patterns of selection–drift variation strongly associate with organismal traits across the green plant lineage
Source: PubMed Central journal article supplement (PMC11444171; doi:10.1101/gr.279002.124), 2024-08
Supplement: Supplemental_figure_S11.pdf [file Supplemental_figure_S11.pdf]

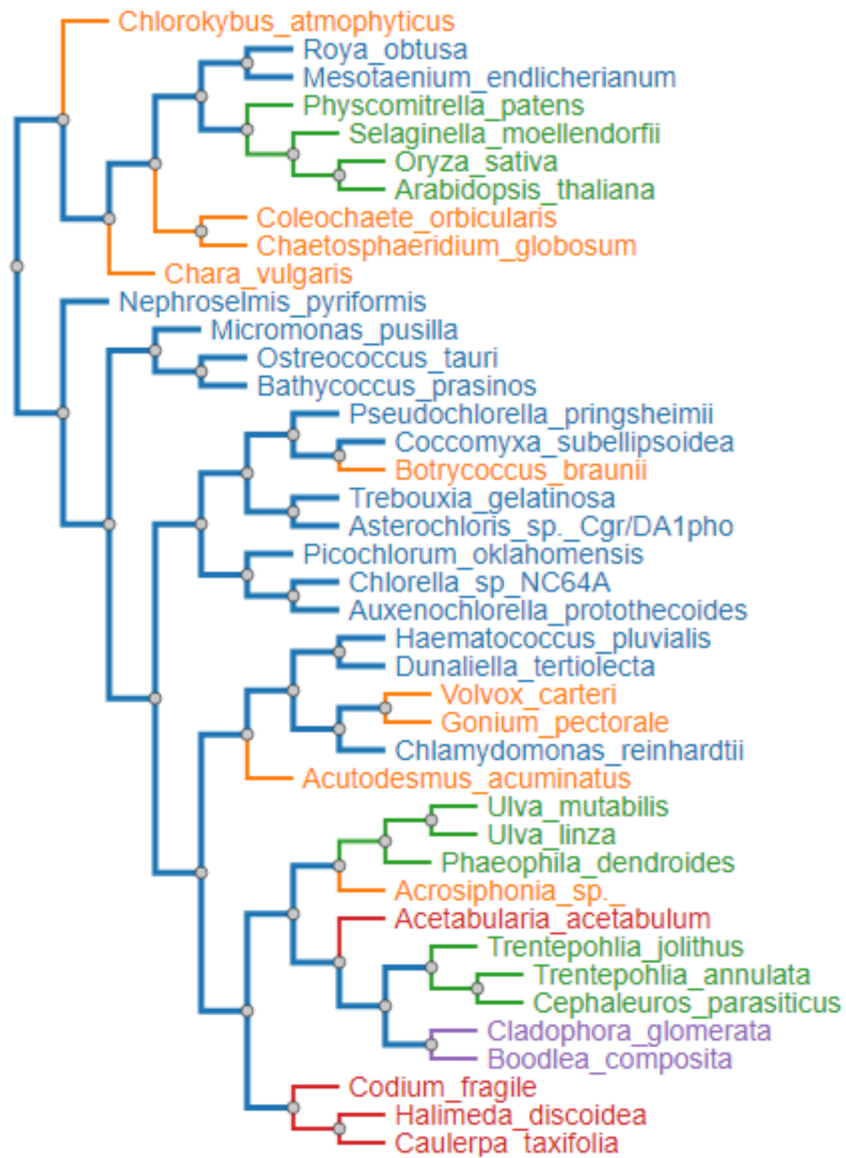

- Unicellular Haploid
- Multicellular Haploid
- Multicellular Haploid-Diploid
- Siphonous Diploid
- Siphonocladous Haploid-Diploid

**Supplemental Figure S11:** Green Algal Phylogeny of liberal dataset showing the trait categories (unicellular haploid, multicellular haploid, multicellular haploid-diploid, siphonocladous haploid-diploid and siphonous diploid) for combined model (Body architecture + Life cycle) [M3]. The molecular evolutionary traits: omega (dN/dS), non-synonymous (dN) and synonymous (dS) were obtained for each of the five categories by allowing five different selection pattern corresponding to the trait categories.
